# Supplementary material for: Methylation level of potato gene OMT30376 regulates tuber anthocyanin transformations
Source: Front Plant Sci. 2022 Oct 7;13:1021617. doi: 10.3389/fpls.2022.1021617 (PMC9585915; doi:10.3389/fpls.2022.1021617)
Supplement: Supplementary file 3 [file Table_3.xlsx]

## Sheet: 5-fold change gene
#ID	gene_name	RS1_FPKM	RS1_count	RS2_FPKM	RS2_count	RS3_FPKM	RS3_count	PS1_FPKM	PS1_count	PS2_FPKM	PS2_count	PS3_FPKM	PS3_count	FDR	log2FC	regulated	COG_class	COG_class_annotation	GO_annotation	KEGG_annotation	KEGG_pathway_annotation	KOG_class	KOG_class_annotation	Pfam_annotation	Swiss_Prot_annotation	eggNOG_class	eggNOG_class_annotation	NR_annotation	GO_second_level_annotation
PGSC0003DMG400010113	Gene of unknown function	1.03536	16	1.27177	22	2.17537	34	11.3895	176	14.5883	199	13.6701	196	1.23704e-11	3.22449	up	--	--	--	--	--	--	--	--	--	S	Function unknown	--	--
PGSC0003DMG400012987	Threonine dehydratase biosynthetic, chloroplastic	0	0	0.026827	3	0	0	11.7024	794	2.27588	137	7.74289	487	1.01081e-06	9.12298	up	[E]	Amino acid transport and metabolism	Molecular Function: L-threonine ammonia-lyase activity (GO:0004794);; Biological Process: gluconeogenesis (GO:0006094);; Biological Process: L-serine metabolic process (GO:0006563);; Biological Process: threonine metabolic process (GO:0006566);; Biological Process: response to stress (GO:0006950);; Biological Process: cytoskeleton organization (GO:0007010);; Biological Process: isoleucine biosynt…	K01754|0|sot:102582387|K01754 threonine dehydratase [EC:4.3.1.19] | (RefSeq) TD; threonine dehydratase biosynthetic-like	Glycine, serine and threonine metabolism (ko00260);; Valine, leucine and isoleucine biosynthesis (ko00290);; Carbon metabolism (ko01200);; Biosynthesis of amino acids (ko01230)	[E]	Amino acid transport and metabolism	Pyridoxal-phosphate dependent enzyme;; C-terminal regulatory domain of Threonine dehydratase	Threonine dehydratase biosynthetic, chloroplastic (Precursor) GN=TD OS=Solanum lycopersicum (Tomato) PE=1 SV=1	E	Amino acid transport and metabolism	PREDICTED: threonine dehydratase biosynthetic, chloroplastic [Solanum lycopersicum]	molecular function: catalytic activity (GO:0003824);; biological process: metabolic process (GO:0008152);; biological process: single-organism process (GO:0044699);; biological process: cellular process (GO:0009987);; biological process: response to stimulus (GO:0050896);; biological process: cellular component organization or biogenesis (GO:0071840);; cellular component: cell (GO:0005623);; cell…
PGSC0003DMG400000547	UP-9A	1.53568	38	3.5897	96	1.7106	42	0.120589	3	0.392987	9	0.1807	5	0.00642591	-3.07072	down	--	--	--	--	--	--	--	--	--	S	Function unknown	PREDICTED: uncharacterized protein LOC101268660 [Solanum lycopersicum]	--
PGSC0003DMG400031529	Glycine-rich protein	0	0	0	0	0	0	2.64031	80	2.13239	59	1.82362	50	7.58422e-16	Inf	up	--	--	Biological Process: cell morphogenesis (GO:0000902);; Cellular Component: cell wall (GO:0005618);; Cellular Component: fungal-type cell wall (GO:0009277);; Biological Process: trichoblast differentiation (GO:0010054);; Biological Process: cell growth (GO:0016049);; Biological Process: cell development (GO:0048468);; Biological Process: developmental growth involved in morphogenesis (GO:0060560);;	--	--	--	--	--	Formin-like protein 20 GN=MBK20.20/MBK20.21 OS=Arabidopsis thaliana (Mouse-ear cress) PE=2 SV=3	--	--	PREDICTED: uncharacterized protein LOC101257603 isoform 1 [Solanum lycopersicum]	biological process: cellular process (GO:0009987);; biological process: developmental process (GO:0032502);; biological process: single-organism process (GO:0044699);; biological process: cellular component organization or biogenesis (GO:0071840);; cellular component: cell (GO:0005623);; cellular component: cell part (GO:0044464);; biological process: multicellular organismal process (GO:0032501)…
PGSC0003DMG400024586	PBng143	0	0	0.130603	16	0.152203	14	0.678946	66	0.476339	40	0.701962	62	7.40668e-05	2.71523	up	[S]	Function unknown	Biological Process: myo-inositol hexakisphosphate biosynthetic process (GO:0010264);;	--	--	--	--	Protein of unknown function, DUF393	Uncharacterized protein At5g50100, mitochondrial (Precursor) GN=At5g50100 OS=Arabidopsis thaliana (Mouse-ear cress) PE=1 SV=1	S	Function unknown	PREDICTED: uncharacterized protein At5g50100, mitochondrial-like [Solanum lycopersicum]	biological process: metabolic process (GO:0008152);; biological process: cellular process (GO:0009987);; biological process: single-organism process (GO:0044699)
PGSC0003DMG400022648	Conserved gene of unknown function	0.202917	24	0.161535	22	0.053879	7	4.87903	574	3.66229	381	4.2542	464	1.56797e-37	4.97464	up	--	--	Molecular Function: binding (GO:0005488);; Biological Process: metabolic process (GO:0008152);; Molecular Function: hydrolase activity (GO:0016787);; Molecular Function: hydrolase activity, acting on glycosyl bonds (GO:0016798);;	--	--	[R]	General function prediction only	Reverse transcriptase (RNA-dependent DNA polymerase)	Endonuclease OS=Nicotiana tabacum (Common tobacco) PE=2 SV=1	R	General function prediction only	PREDICTED: uncharacterized protein LOC101266877 [Solanum lycopersicum]	molecular function: binding (GO:0005488);; biological process: metabolic process (GO:0008152);; molecular function: catalytic activity (GO:0003824)
PGSC0003DMG400020467	Conserved gene of unknown function	2.82421	74	2.63571	76	2.10567	55	12.2125	317	11.1367	256	14.1412	340	7.63117e-10	2.3899	up	[Q]	Secondary metabolites biosynthesis, transport and catabolism	Biological Process: very long-chain fatty acid metabolic process (GO:0000038);; Molecular Function: monooxygenase activity (GO:0004497);; Molecular Function: iron ion binding (GO:0005506);; Cellular Component: extracellular region (GO:0005576);; Cellular Component: endoplasmic reticulum (GO:0005783);; Biological Process: intra-Golgi vesicle-mediated transport (GO:0006891);; Biological Process: me…	--	--	[Q]	Secondary metabolites biosynthesis, transport and catabolism	Cytochrome P450	Cytochrome P450 76C2 GN=CYP76C2 OS=Arabidopsis thaliana (Mouse-ear cress) PE=2 SV=1	Q	Secondary metabolites biosynthesis, transport and catabolism	PREDICTED: geraniol 8-hydroxylase-like [Solanum lycopersicum]	biological process: metabolic process (GO:0008152);; biological process: cellular process (GO:0009987);; biological process: single-organism process (GO:0044699);; molecular function: catalytic activity (GO:0003824);; molecular function: binding (GO:0005488);; cellular component: extracellular region (GO:0005576);; cellular component: cell (GO:0005623);; cellular component: organelle (GO:0043226)…
PGSC0003DMG400020723	Germin 3	82.6779	2048	172.966	4822	179.333	4708	22.2636	554	37.2966	832	18.5482	328	0.00118066	-2.49705	down	--	--	Cellular Component: cytoplasm (GO:0005737);; Cellular Component: extracellular matrix (GO:0031012);; Molecular Function: oxalate oxidase activity (GO:0050162);;	--	--	--	--	Cupin	Germin-like protein subfamily 1 member 13 (Precursor) GN=GLP6 OS=Arabidopsis thaliana (Mouse-ear cress) PE=2 SV=2	R	General function prediction only	germin-like protein subfamily 1 member 20 precursor [Solanum tuberosum]	cellular component: cell (GO:0005623);; cellular component: cell part (GO:0044464);; cellular component: extracellular region (GO:0005576);; cellular component: extracellular region part (GO:0044421);; molecular function: catalytic activity (GO:0003824);; biological process: metabolic process (GO:0008152);; biological process: single-organism process (GO:0044699)
PGSC0003DMG400038918	Serine-threonine protein kinase, plant-type	2.20994	129	2.13965	139	2.35696	137	15.5333	905	17.5992	906	17.723	956	5.50724e-31	3.01108	up	[RTKL]	General function prediction only;; Signal transduction mechanisms;; Transcription;; Replication, recombination and repair	Molecular Function: protein kinase activity (GO:0004672);; Molecular Function: protein binding (GO:0005515);; Cellular Component: endosome (GO:0005768);; Cellular Component: plasma membrane (GO:0005886);; Biological Process: protein phosphorylation (GO:0006468);; Biological Process: signal transduction (GO:0007165);; Molecular Function: chitin binding (GO:0008061);; Biological Process: response t…	K04733|0|sot:102596810|K04733 interleukin-1 receptor-associated kinase 4 [EC:2.7.11.1] | (RefSeq) protein LYK5-like	--	--	--	Protein tyrosine kinase;; Protein kinase domain;; LysM domain	Protein LYK5 (Precursor) GN=LYK5 OS=Arabidopsis thaliana (Mouse-ear cress) PE=1 SV=1	T	Signal transduction mechanisms	PREDICTED: lysM domain receptor-like kinase 4-like [Solanum lycopersicum]	molecular function: catalytic activity (GO:0003824);; biological process: metabolic process (GO:0008152);; biological process: cellular process (GO:0009987);; molecular function: binding (GO:0005488);; cellular component: cell (GO:0005623);; cellular component: organelle (GO:0043226);; cellular component: cell part (GO:0044464);; cellular component: membrane (GO:0016020);; biological process: bio…
PGSC0003DMG400014212	Heat shock protein	23.4689	1696	2.8748	231	18.0457	1298	59.111	4271	56.8987	3635	103.343	6918	0.000695653	2.41469	up	[O]	Posttranslational modification, protein turnover, chaperones	Molecular Function: protease binding (GO:0002020);; Molecular Function: receptor activity (GO:0004872);; Molecular Function: KDEL sequence binding (GO:0005046);; Molecular Function: ATP binding (GO:0005524);; Cellular Component: cell wall (GO:0005618);; Cellular Component: mitochondrion (GO:0005739);; Cellular Component: vacuolar membrane (GO:0005774);; Cellular Component: endoplasmic reticulum l…	K03283|0|sot:102588418|K03283 heat shock 70kDa protein 1/8 | (RefSeq) heat shock 70 kDa protein 5	Spliceosome (ko03040);; Protein processing in endoplasmic reticulum (ko04141);; Endocytosis (ko04144)	[O]	Posttranslational modification, protein turnover, chaperones	Hsp70 protein;; Hydantoinase/oxoprolinase;; NAD-specific glutamate dehydrogenase	Heat shock cognate 70 kDa protein GN=HSP70 OS=Petunia hybrida (Petunia) PE=2 SV=1	O	Posttranslational modification, protein turnover, chaperones	PREDICTED: heat shock cognate 70 kDa protein-like [Solanum lycopersicum]	molecular function: binding (GO:0005488);; molecular function: molecular transducer activity (GO:0060089);; cellular component: cell (GO:0005623);; cellular component: cell part (GO:0044464);; cellular component: organelle (GO:0043226);; cellular component: membrane (GO:0016020);; cellular component: organelle part (GO:0044422);; cellular component: membrane-enclosed lumen (GO:0031974);; biologic…
PGSC0003DMG400002791	Conserved gene of unknown function	2.19458	55	1.24977	35	1.16077	29	14.044	349	8.07885	178	13.0397	300	3.42727e-11	3.00788	up	--	--	--	--	--	--	--	Protein of unknown function, DUF538	--	S	Function unknown	PREDICTED: uncharacterized protein LOC101254641 [Solanum lycopersicum]	--
PGSC0003DMG402022401	Conserved gene of unknown function	0.303993	11	0.339286	14	0.483221	18	3.2663	116	5.52604	174	3.89308	129	5.24382e-09	3.53643	up	--	--	--	--	--	--	--	Wound-induced protein	--	S	Function unknown	Uncharacterized protein TCM_030005 [Theobroma cacao]	--
PGSC0003DMG400007335	Apyrase 3	0.072355	5	0	0	0.133664	8	2.18203	117	1.16198	57	1.96293	87	7.44716e-12	4.50134	up	[GO]	Carbohydrate transport and metabolism;; Posttranslational modification, protein turnover, chaperones	Molecular Function: nucleotide binding (GO:0000166);; Molecular Function: guanosine-diphosphatase activity (GO:0004382);; Molecular Function: calmodulin binding (GO:0005516);; Cellular Component: extracellular space (GO:0005615);; Cellular Component: mitochondrion (GO:0005739);; Cellular Component: endosome (GO:0005768);; Cellular Component: Golgi apparatus (GO:0005794);; Cellular Component: tran…	K14641|0|sot:102590620|K14641 apyrase [EC:3.6.1.5] | (RefSeq) apyrase-like	Purine metabolism (ko00230);; Pyrimidine metabolism (ko00240)	[F]	Nucleotide transport and metabolism	GDA1/CD39 (nucleoside phosphatase) family	Apyrase GN=RROP1 OS=Solanum tuberosum (Potato) PE=1 SV=2	F	Nucleotide transport and metabolism	PREDICTED: apyrase-like [Solanum lycopersicum]	molecular function: binding (GO:0005488);; molecular function: catalytic activity (GO:0003824);; cellular component: extracellular region (GO:0005576);; cellular component: extracellular region part (GO:0044421);; cellular component: cell (GO:0005623);; cellular component: organelle (GO:0043226);; cellular component: cell part (GO:0044464);; cellular component: organelle part (GO:0044422);; cellu…
PGSC0003DMG400002076	Homeobox protein	0.021849	2	0.040908	4	0.046535	5	1.4047	119	0.391204	31	1.22151	100	9.36515e-05	4.69802	up	[K]	Transcription	Biological Process: double-strand break repair via homologous recombination (GO:0000724);; Molecular Function: transcription factor activity, sequence-specific DNA binding (GO:0003700);; Molecular Function: protein binding (GO:0005515);; Cellular Component: nucleus (GO:0005634);; Cellular Component: cytoplasm (GO:0005737);; Biological Process: regulation of transcription, DNA-templated (GO:000635…	K09338|0|sot:102586817|K09338 homeobox-leucine zipper protein | (RefSeq) homeobox-leucine zipper protein PROTODERMAL FACTOR 2	--	--	--	START domain;; Homeobox domain	Homeobox-leucine zipper protein PROTODERMAL FACTOR 2 GN=PDF2 OS=Arabidopsis thaliana (Mouse-ear cress) PE=2 SV=1	K	Transcription	PREDICTED: homeobox-leucine zipper protein PROTODERMAL FACTOR 2-like [Solanum lycopersicum]	biological process: metabolic process (GO:0008152);; biological process: cellular process (GO:0009987);; biological process: response to stimulus (GO:0050896);; molecular function: nucleic acid binding transcription factor activity (GO:0001071);; biological process: biological regulation (GO:0065007);; molecular function: binding (GO:0005488);; cellular component: cell (GO:0005623);; cellular com…
PGSC0003DMG400006394	DNA binding protein	10.7702	576	18.1814	1045	15.3278	819	90.2975	4696	108.286	4895	92.816	4389	5.15437e-40	2.76466	up	--	--	Biological Process: cell fate specification (GO:0001708);; Molecular Function: DNA binding (GO:0003677);; Molecular Function: protein binding (GO:0005515);; Cellular Component: nucleus (GO:0005634);; Biological Process: post-embryonic animal morphogenesis (GO:0009886);; Biological Process: flower development (GO:0009908);; Biological Process: epidermal cell differentiation (GO:0009913);; Biologic…	--	--	--	--	Helix-loop-helix DNA-binding domain	Transcription factor bHLH93 GN=K21L13.16 OS=Arabidopsis thaliana (Mouse-ear cress) PE=1 SV=1	K	Transcription	PREDICTED: transcription factor bHLH93-like [Solanum lycopersicum]	biological process: cellular process (GO:0009987);; biological process: developmental process (GO:0032502);; biological process: single-organism process (GO:0044699);; molecular function: binding (GO:0005488);; cellular component: cell (GO:0005623);; cellular component: organelle (GO:0043226);; cellular component: cell part (GO:0044464);; biological process: reproduction (GO:0000003);; biological…
Solanum_tuberosum_newGene_2686	--	0.733952	26	0	0	0	0	2.2097	73	1.55975	48	1.31222	43	3.14343e-05	2.85709	up	--	--	Molecular Function: zinc ion binding (GO:0008270);;	--	--	--	--	--	--	S	Function unknown	PREDICTED: uncharacterized protein LOC102599910 [Solanum tuberosum]	molecular function: binding (GO:0005488)
PGSC0003DMG401024975	Conserved gene of unknown function	19.1683	815	31.6024	1491	26.0398	1102	182.086	7740	125.575	4719	130.765	5150	2.1704e-17	2.5915	up	--	--	Biological Process: developmental process involved in reproduction (GO:0003006);; Molecular Function: binding (GO:0005488);; Cellular Component: plasma membrane (GO:0005886);; Biological Process: response to abiotic stimulus (GO:0009628);; Biological Process: response to hormone (GO:0009725);; Biological Process: post-embryonic development (GO:0009791);; Biological Process: cellular component org…	--	--	--	--	--	Lysine-rich arabinogalactan protein 18 (Precursor) GN=AGP18 OS=Arabidopsis thaliana (Mouse-ear cress) PE=2 SV=1	--	--	arabinogalactan [Solanum tuberosum]	biological process: reproduction (GO:0000003);; biological process: reproductive process (GO:0022414);; biological process: developmental process (GO:0032502);; molecular function: binding (GO:0005488);; cellular component: cell (GO:0005623);; cellular component: membrane (GO:0016020);; cellular component: cell part (GO:0044464);; biological process: response to stimulus (GO:0050896);; biological…
Solanum_tuberosum_newGene_12215	--	0.32638	15	0.040078	3	0.125392	6	7.63834	325	1.58427	62	5.36219	216	0.000826833	4.8179	up	[E]	Amino acid transport and metabolism	Molecular Function: arginase activity (GO:0004053);; Biological Process: putrescine biosynthetic process from arginine (GO:0033388);; Molecular Function: metal ion binding (GO:0046872);;	K01476|0|sot:102601598|K01476 arginase [EC:3.5.3.1] | (RefSeq) arginase 1, mitochondrial-like	Arginine biosynthesis (ko00220);; Arginine and proline metabolism (ko00330);; Biosynthesis of amino acids (ko01230)	[E]	Amino acid transport and metabolism	Arginase family	Arginase 1, mitochondrial OS=Arabidopsis thaliana OX=3702 GN=ARGAH1 PE=1 SV=1	E	Amino acid transport and metabolism	PREDICTED: arginase 1, mitochondrial-like [Solanum tuberosum]	molecular function: catalytic activity (GO:0003824);; biological process: metabolic process (GO:0008152);; biological process: cellular process (GO:0009987);; biological process: single-organism process (GO:0044699);; molecular function: binding (GO:0005488)
PGSC0003DMG400031827	Conserved gene of unknown function	4.33758	472	3.21985	389	4.2415	460	21.5518	2345	20.377	1958	18.5433	1867	4.73856e-30	2.44883	up	--	--	Biological Process: response to stress (GO:0006950);; Biological Process: response to abiotic stimulus (GO:0009628);; Biological Process: primary metabolic process (GO:0044238);; Biological Process: cellular biosynthetic process (GO:0044249);; Biological Process: cellular macromolecule metabolic process (GO:0044260);; Biological Process: organic substance biosynthetic process (GO:1901576);;	--	--	--	--	--	--	S	Function unknown	PREDICTED: uncharacterized protein LOC101261956 [Solanum lycopersicum]	biological process: response to stimulus (GO:0050896);; biological process: metabolic process (GO:0008152);; biological process: cellular process (GO:0009987)
PGSC0003DMG400018407	Zinc finger protein	20.4248	556	13.9602	422	17.6387	478	70.9947	1932	99.2432	2387	80.5664	2031	5.89016e-13	2.36826	up	--	--	Biological Process: respiratory burst involved in defense response (GO:0002679);; Molecular Function: ubiquitin-protein transferase activity (GO:0004842);; Molecular Function: protein binding (GO:0005515);; Cellular Component: nucleus (GO:0005634);; Cellular Component: vacuolar membrane (GO:0005774);; Cellular Component: cytosol (GO:0005829);; Molecular Function: zinc ion binding (GO:0008270);; B…	--	--	[O]	Posttranslational modification, protein turnover, chaperones	Ring finger domain;; Zinc finger, C3HC4 type (RING finger);; Zinc finger, C3HC4 type (RING finger);; Zinc finger, C3HC4 type (RING finger)	E3 ubiquitin-protein ligase RING1-like GN=At3g19950 OS=Arabidopsis thaliana (Mouse-ear cress) PE=2 SV=1	O	Posttranslational modification, protein turnover, chaperones	PREDICTED: E3 ubiquitin-protein ligase Praja-1-like isoform 1 [Solanum lycopersicum]	biological process: immune system process (GO:0002376);; biological process: metabolic process (GO:0008152);; biological process: single-organism process (GO:0044699);; molecular function: catalytic activity (GO:0003824);; molecular function: binding (GO:0005488);; cellular component: cell (GO:0005623);; cellular component: organelle (GO:0043226);; cellular component: cell part (GO:0044464);; cel…
PGSC0003DMG400029773	Ethylene-responsive transcriptional coactivator	10.3562	343	3.71814	124	6.10951	187	44.5019	1334	60.3912	1664	45.2165	1341	3.92608e-14	2.96739	up	[K]	Transcription	Molecular Function: DNA binding (GO:0003677);; Molecular Function: transcription factor activity, sequence-specific DNA binding (GO:0003700);; Molecular Function: transcription coactivator activity (GO:0003713);; Cellular Component: nucleolus (GO:0005730);; Cellular Component: cytoplasm (GO:0005737);; Biological Process: protein folding (GO:0006457);; Biological Process: response to heat (GO:0009…	K03627|2.33072e-88|sot:102594575|K03627 putative transcription factor | (RefSeq) multiprotein-bridging factor 1c	--	[K]	Transcription	Multiprotein bridging factor 1;; Helix-turn-helix;; Helix-turn-helix domain	Multiprotein-bridging factor 1c GN=MBF1C OS=Arabidopsis thaliana (Mouse-ear cress) PE=1 SV=1	K	Transcription	ethylene-responsive transcriptional coactivator [Solanum lycopersicum]	molecular function: binding (GO:0005488);; molecular function: nucleic acid binding transcription factor activity (GO:0001071);; biological process: biological regulation (GO:0065007);; molecular function: transcription factor activity, protein binding (GO:0000988);; cellular component: cell (GO:0005623);; cellular component: organelle (GO:0043226);; cellular component: organelle part (GO:0044422…
PGSC0003DMG400001172	Conserved gene of unknown function	0	0	0	0	0	0	3.57987	55	5.33918	72	3.52685	50	3.05116e-15	Inf	up	--	--	--	--	--	--	--	--	--	S	Function unknown	PREDICTED: uncharacterized protein LOC101264057 [Solanum lycopersicum]	--
PGSC0003DMG400025098	All-trans-retinol 13,14-reductase	0	0	0.136768	12	0.093768	7	2.20833	143	1.2028	76	2.06675	124	2.96858e-13	4.40887	up	[Q]	Secondary metabolites biosynthesis, transport and catabolism	Molecular Function: catalytic activity (GO:0003824);; Cellular Component: mitochondrion (GO:0005739);; Cellular Component: chloroplast (GO:0009507);; Biological Process: carotenoid biosynthetic process (GO:0016117);; Biological Process: cellular biosynthetic process (GO:0044249);; Biological Process: pigment biosynthetic process (GO:0046148);; Molecular Function: carotenoid isomerase activity (GO…	--	--	[H]	Coenzyme transport and metabolism	NAD(P)-binding Rossmann-like domain;; FAD dependent oxidoreductase;; Flavin containing amine oxidoreductase;; FAD binding domain;; GDP dissociation inhibitor;; HI0933-like protein	Prolycopene isomerase 1, chloroplastic (Precursor) GN=CRTISO1 OS=Oncidium hybrid cultivar (Orchid) PE=2 SV=1	H	Coenzyme transport and metabolism	PREDICTED: prolycopene isomerase, chloroplastic-like [Solanum lycopersicum]	molecular function: catalytic activity (GO:0003824);; cellular component: cell (GO:0005623);; cellular component: organelle (GO:0043226);; cellular component: cell part (GO:0044464);; biological process: metabolic process (GO:0008152);; biological process: cellular process (GO:0009987);; biological process: single-organism process (GO:0044699)
PGSC0003DMG400019302	Nt-iaa4.5 deduced protein	0.591423	30	0.356523	14	0.28477	15	1.16864	80	1.42261	77	1.81986	105	5.97651e-05	2.38399	up	--	--	Molecular Function: transcription factor activity, sequence-specific DNA binding (GO:0003700);; Cellular Component: nucleus (GO:0005634);; Biological Process: transcription, DNA-templated (GO:0006351);; Biological Process: regulation of transcription, DNA-templated (GO:0006355);; Biological Process: regulation of translation (GO:0006417);; Biological Process: response to osmotic stress (GO:000697…	K14484|4.35091e-122|sot:102578779|K14484 auxin-responsive protein IAA | (RefSeq) auxin-induced protein 22D-like	Plant hormone signal transduction (ko04075)	--	--	AUX/IAA family	Auxin-induced protein 22D GN=AUX22D OS=Vigna radiata var. radiata (Mung bean) PE=2 SV=1	K	Transcription	IAA3 protein [Solanum lycopersicum]	molecular function: nucleic acid binding transcription factor activity (GO:0001071);; biological process: biological regulation (GO:0065007);; cellular component: cell (GO:0005623);; cellular component: organelle (GO:0043226);; cellular component: cell part (GO:0044464);; biological process: metabolic process (GO:0008152);; biological process: cellular process (GO:0009987);; biological process: r…
PGSC0003DMG400002607	Conserved gene of unknown function	7.32081	1055	2.93595	470	3.22259	463	0.287549	42	0.39223	50	0.319009	43	0.00158038	-3.63968	down	--	--	--	--	--	--	--	--	Protein ycf2 (Fragment) GN=ycf2 OS=Oenothera picensis (Evening primrose) PE=3 SV=1	S	Function unknown	PREDICTED: uncharacterized protein LOC101253763 [Solanum lycopersicum]	--
PGSC0003DMG402025869	C2 domain-containing protein	44.1591	2106	45.9139	2416	49.375	2339	286.769	13623	283.558	11912	246.829	10860	6.04117e-39	2.63901	up	--	--	Biological Process: developmental process involved in reproduction (GO:0003006);; Cellular Component: cell wall (GO:0005618);; Biological Process: response to stress (GO:0006950);; Biological Process: response to abiotic stimulus (GO:0009628);; Biological Process: anatomical structure morphogenesis (GO:0009653);; Biological Process: post-embryonic development (GO:0009791);; Biological Process: ti…	--	--	[R]	General function prediction only	C2 domain	Proline-rich extensin-like protein EPR1 (Precursor) GN=EPR1 OS=Arabidopsis thaliana (Mouse-ear cress) PE=2 SV=1	R	General function prediction only	PREDICTED: elicitor-responsive protein 1-like isoform 2 [Solanum lycopersicum]	biological process: reproduction (GO:0000003);; biological process: reproductive process (GO:0022414);; biological process: developmental process (GO:0032502);; cellular component: cell (GO:0005623);; cellular component: cell part (GO:0044464);; biological process: response to stimulus (GO:0050896);; biological process: multicellular organismal process (GO:0032501);; biological process: single-or…
PGSC0003DMG400010718	GDSL-motif lipase/hydrolase family protein	0.227461	11	0	0	0	0	7.48665	330	1.00321	40	5.09847	208	0.00173401	5.87129	up	--	--	Biological Process: very long-chain fatty acid metabolic process (GO:0000038);; Biological Process: polysaccharide biosynthetic process (GO:0000271);; Molecular Function: carboxylic ester hydrolase activity (GO:0004091);; Cellular Component: extracellular region (GO:0005576);; Biological Process: pattern specification process (GO:0007389);; Biological Process: regulation of cell size (GO:0008361)…	--	--	--	--	GDSL-like Lipase/Acylhydrolase	GDSL esterase/lipase At5g45950 (Precursor) GN=At5g45950 OS=Arabidopsis thaliana (Mouse-ear cress) PE=2 SV=1	I	Lipid transport and metabolism	PREDICTED: GDSL esterase/lipase At5g45950-like [Solanum lycopersicum]	biological process: metabolic process (GO:0008152);; biological process: cellular process (GO:0009987);; biological process: single-organism process (GO:0044699);; cellular component: extracellular region (GO:0005576);; biological process: multicellular organismal process (GO:0032501);; biological process: biological regulation (GO:0065007);; biological process: cellular component organization or…
PGSC0003DMG400007244	GDSL-lipase 1	1.84698	84	0.113428	7	1.15107	51	19.8559	879	4.84573	191	12.8065	526	0.00464184	3.64825	up	--	--	Biological Process: very long-chain fatty acid metabolic process (GO:0000038);; Molecular Function: carboxylic ester hydrolase activity (GO:0004091);; Cellular Component: extracellular space (GO:0005615);; Cellular Component: cell wall (GO:0005618);; Cellular Component: nucleus (GO:0005634);; Biological Process: lipid metabolic process (GO:0006629);; Biological Process: water transport (GO:000683…	--	--	--	--	GDSL-like Lipase/Acylhydrolase	GDSL esterase/lipase At1g29670 (Precursor) GN=At1g29670 OS=Arabidopsis thaliana (Mouse-ear cress) PE=2 SV=1	R	General function prediction only	PREDICTED: GDSL esterase/lipase At1g29670-like [Solanum lycopersicum]	biological process: metabolic process (GO:0008152);; biological process: cellular process (GO:0009987);; biological process: single-organism process (GO:0044699);; cellular component: extracellular region (GO:0005576);; cellular component: extracellular region part (GO:0044421);; cellular component: cell (GO:0005623);; cellular component: cell part (GO:0044464);; cellular component: organelle (GO…
Solanum_tuberosum_newGene_12320	--	0	0	0.054183	3	0.088995	3	1.51166	51	2.02122	61	1.91622	60	1.43774e-10	5.09492	up	--	--	--	--	--	--	--	--	--	--	--	PREDICTED: uncharacterized protein LOC107057900 [Solanum tuberosum]	--
PGSC0003DMG400009152	Endonuclease	8.12012	1331	7.79589	1439	8.50975	1396	1.79635	220	0.949706	84	0.930355	82	4.91136e-38	-3.2439	down	--	--	--	--	--	--	--	NUMOD3 motif (2 copies)	--	S	Function unknown	PREDICTED: uncharacterized protein LOC101243687 isoform 2 [Solanum lycopersicum]	--
PGSC0003DMG400014836	Steroid binding protein	11.7143	241	13.9448	318	13.7032	280	1.80634	38	0.167828	4	1.81398	35	5.33079e-13	-3.25979	down	--	--	Cellular Component: extracellular region (GO:0005576);; Cellular Component: nucleus (GO:0005634);; Cellular Component: endoplasmic reticulum (GO:0005783);; Cellular Component: cytosol (GO:0005829);; Cellular Component: plasma membrane (GO:0005886);; Cellular Component: chloroplast thylakoid membrane (GO:0009535);; Biological Process: indoleacetic acid biosynthetic process (GO:0009684);; Biologica…	K17278|5.30154e-67|sot:102598454|K17278 membrane-associated progesterone receptor component | (RefSeq) probable steroid-binding protein 3	--	[R]	General function prediction only	Cytochrome b5-like Heme/Steroid binding domain	Probable steroid-binding protein 3 GN=MP3 OS=Arabidopsis thaliana (Mouse-ear cress) PE=1 SV=1	R	General function prediction only	PREDICTED: probable steroid-binding protein 3-like [Solanum lycopersicum]	cellular component: extracellular region (GO:0005576);; cellular component: cell (GO:0005623);; cellular component: organelle (GO:0043226);; cellular component: cell part (GO:0044464);; cellular component: membrane (GO:0016020);; cellular component: organelle part (GO:0044422);; biological process: metabolic process (GO:0008152);; biological process: cellular process (GO:0009987);; biological pro…
PGSC0003DMG400015104	WRKY transcription factor	0.546111	34	0.556485	39	0.686142	43	0.128573	9	0.117764	7	0	0	0.00140122	-2.64749	down	--	--	Biological Process: transition metal ion transport (GO:0000041);; Biological Process: respiratory burst involved in defense response (GO:0002679);; Molecular Function: DNA binding (GO:0003677);; Molecular Function: transcription factor activity, sequence-specific DNA binding (GO:0003700);; Molecular Function: calmodulin binding (GO:0005516);; Cellular Component: nucleus (GO:0005634);; Cellular Co…	--	--	--	--	WRKY DNA -binding domain	Probable WRKY transcription factor 14 GN=WRKY14 OS=Arabidopsis thaliana (Mouse-ear cress) PE=2 SV=2	K	Transcription	PREDICTED: LOW QUALITY PROTEIN: probable WRKY transcription factor 35-like [Solanum lycopersicum]	biological process: localization (GO:0051179);; biological process: immune system process (GO:0002376);; biological process: metabolic process (GO:0008152);; biological process: single-organism process (GO:0044699);; molecular function: binding (GO:0005488);; molecular function: nucleic acid binding transcription factor activity (GO:0001071);; biological process: biological regulation (GO:0065007…
PGSC0003DMG400000383	Mrp protein	0.179933	15	0.093316	9	0.156578	11	0.988106	68	0.779988	55	0.934263	70	4.02986e-05	2.68768	up	[D]	Cell cycle control, cell division, chromosome partitioning	Biological Process: maltose metabolic process (GO:0000023);; Molecular Function: ATP binding (GO:0005524);; Cellular Component: cytosol (GO:0005829);; Biological Process: pentose-phosphate shunt (GO:0006098);; Biological Process: rRNA processing (GO:0006364);; Cellular Component: chloroplast stroma (GO:0009570);; Biological Process: chloroplast relocation (GO:0009902);; Biological Process: thylak…	--	--	[D]	Cell cycle control, cell division, chromosome partitioning	ParA/MinD ATPase like;; CobQ/CobB/MinD/ParA nucleotide binding domain;; Domain of unknown function DUF59;; AAA domain;; ATPase MipZ;; Protein of unknown function (DUF971);; VirC1 protein	Cytosolic Fe-S cluster assembly factor NBP35 GN=NBP35 OS=Arabidopsis thaliana (Mouse-ear cress) PE=1 SV=1	D	Cell cycle control, cell division, chromosome partitioning	PREDICTED: protein mrp homolog isoform 1 [Solanum lycopersicum]	biological process: metabolic process (GO:0008152);; biological process: cellular process (GO:0009987);; biological process: single-organism process (GO:0044699);; molecular function: binding (GO:0005488);; cellular component: cell (GO:0005623);; cellular component: cell part (GO:0044464);; cellular component: organelle (GO:0043226);; cellular component: organelle part (GO:0044422);; biological p…
PGSC0003DMG400000277	Cytokinin oxidase/dehydrogenase 2	0.124608	7	0	0	0.042085	3	2.96763	144	1.09101	47	2.50455	113	3.52817e-07	5.09821	up	[C]	Energy production and conversion	Cellular Component: extracellular region (GO:0005576);; Cellular Component: vacuole (GO:0005773);; Molecular Function: primary amine oxidase activity (GO:0008131);; Molecular Function: UDP-N-acetylmuramate dehydrogenase activity (GO:0008762);; Biological Process: cytokinin metabolic process (GO:0009690);; Biological Process: jasmonic acid metabolic process (GO:0009694);; Biological Process: respo…	K00279|0|sot:102577888|K00279 cytokinin dehydrogenase [EC:1.5.99.12] | (RefSeq) cytokinin oxidase/dehydrogenase 2	Zeatin biosynthesis (ko00908)	[C]	Energy production and conversion	Cytokinin dehydrogenase 1, FAD and cytokinin binding;; FAD binding domain	Cytokinin dehydrogenase 3 (Precursor) GN=CKX3 OS=Arabidopsis thaliana (Mouse-ear cress) PE=1 SV=1	C	Energy production and conversion	cytokinin oxidase/dehydrogenase 2 [Solanum tuberosum]	cellular component: extracellular region (GO:0005576);; cellular component: cell (GO:0005623);; cellular component: organelle (GO:0043226);; cellular component: cell part (GO:0044464);; molecular function: catalytic activity (GO:0003824);; biological process: metabolic process (GO:0008152);; biological process: single-organism process (GO:0044699);; biological process: cellular process (GO:000998…
Solanum_tuberosum_newGene_2121	--	0.137878	7	0	0	0	0	5.08687	216	5.10396	210	2.84911	119	1.82237e-17	6.50012	up	--	--	--	--	--	--	--	Plant transposase (Ptta/En/Spm family)	--	S	Function unknown	PREDICTED: uncharacterized protein LOC107061933 [Solanum tuberosum]	--
Solanum_tuberosum_newGene_11154	--	1.45362	105	1.31978	168	1.40359	161	0.145515	17	0.295808	30	0	0	5.12526e-08	-2.94003	down	--	--	--	--	--	--	--	GRF zinc finger	--	--	--	PREDICTED: uncharacterized protein LOC107001919 [Solanum pennellii]	--
PGSC0003DMG400027181	Transferase family protein	2.97205	149	1.70722	95	1.56808	79	0.283332	15	0.179218	8	0.150498	7	5.31524e-06	-3.22499	down	--	--	Cellular Component: cytoplasm (GO:0005737);; Molecular Function: O-acyltransferase activity (GO:0008374);; Biological Process: anatomical structure morphogenesis (GO:0009653);; Biological Process: phenylpropanoid biosynthetic process (GO:0009699);; Biological Process: cellular component organization (GO:0016043);; Molecular Function: N-acyltransferase activity (GO:0016410);; Biological Process: p…	--	--	--	--	Transferase family	Uncharacterized acetyltransferase At3g50280 GN=At3g50280 OS=Arabidopsis thaliana (Mouse-ear cress) PE=1 SV=1	S	Function unknown	PREDICTED: BAHD acyltransferase DCR-like [Solanum lycopersicum]	cellular component: cell (GO:0005623);; cellular component: cell part (GO:0044464);; molecular function: catalytic activity (GO:0003824);; biological process: developmental process (GO:0032502);; biological process: metabolic process (GO:0008152);; biological process: cellular process (GO:0009987);; biological process: single-organism process (GO:0044699);; biological process: cellular component …
PGSC0003DMG401018962	Beta-amyrin synthase	0.378317	28	0	0	0	0	5.03195	367	2.39552	155	5.08246	343	5.57679e-11	5.14084	up	[I]	Lipid transport and metabolism	Biological Process: pentacyclic triterpenoid biosynthetic process (GO:0019745);; Molecular Function: lupeol synthase activity (GO:0042299);; Molecular Function: beta-amyrin synthase activity (GO:0042300);; Biological Process: cuticle development (GO:0042335);; Molecular Function: alpha-amyrin synthase activity (GO:0042561);; Molecular Function: camelliol C synthase activity (GO:0090438);;	K15813|0|sot:102591877|K15813 beta-amyrin synthase [EC:5.4.99.39] | (RefSeq) delta-amyrin synthase	Sesquiterpenoid and triterpenoid biosynthesis (ko00909)	[I]	Lipid transport and metabolism	Prenyltransferase-like;; Prenyltransferase and squalene oxidase repeat;; Prenyltransferase-like;; Pectic acid lyase	Delta-amyrin synthase GN=TTS2 OS=Solanum lycopersicum (Tomato) PE=1 SV=1	I	Lipid transport and metabolism	delta-amyrin synthase [Solanum lycopersicum]	biological process: metabolic process (GO:0008152);; biological process: cellular process (GO:0009987);; biological process: single-organism process (GO:0044699);; molecular function: catalytic activity (GO:0003824);; biological process: developmental process (GO:0032502)
Solanum_tuberosum_newGene_8622	--	18.28	233	1.59232	26	6.55835	85	136.962	1763	55.2133	648	144.37	1660	8.41042e-06	3.75151	up	--	--	Molecular Function: serine-type endopeptidase inhibitor activity (GO:0004867);; Biological Process: response to wounding (GO:0009611);; Biological Process: negative regulation of endopeptidase activity (GO:0010951);;	--	--	--	--	Potato inhibitor I family	Ethylene-responsive proteinase inhibitor 1 OS=Solanum lycopersicum OX=4081 PE=3 SV=1	--	--	proteinase inhibitor I [Solanum tuberosum]	molecular function: molecular function regulator (GO:0098772);; biological process: biological regulation (GO:0065007);; biological process: response to stimulus (GO:0050896)
PGSC0003DMG400021894	Gene of unknown function	0.444046	36	0.201302	18	0.314322	26	3.86404	310	3.41575	243	3.2413	241	2.65461e-16	3.52882	up	--	--	--	--	--	--	--	--	--	--	--	--	--
PGSC0003DMG400029736	Gene of unknown function	11.0746	161	15.6048	252	10.8446	157	63.1206	916	106.789	1370	66.5921	896	1.07288e-05	2.74576	up	--	--	--	--	--	--	--	--	--	--	--	--	--
Solanum_tuberosum_newGene_3872	--	0.073621	7	0.125801	14	0.172809	17	0.951681	91	0.497133	43	0.455535	40	0.00185563	2.39239	up	--	--	--	--	--	--	--	--	--	--	--	--	--
Solanum_tuberosum_newGene_8731	--	1.00856	26	0.123523	4	0.499877	13	5.95632	151	1.68299	38	4.1979	99	0.00891977	2.91207	up	--	--	--	--	--	--	--	Glycine rich protein family	--	--	--	PREDICTED: glycine-rich cell wall structural protein-like isoform X1 [Solanum tuberosum]	--
PGSC0003DMG400028578	DNA binding protein	5.05466	189	1.80503	75	3.15828	118	0.242029	10	0	0	0	0	9.74111e-06	-5.17545	down	--	--	Cellular Component: nucleus (GO:0005634);; Biological Process: cellular protein modification process (GO:0006464);; Biological Process: signal transduction (GO:0007165);; Biological Process: response to abiotic stimulus (GO:0009628);; Biological Process: guard cell differentiation (GO:0010052);; Biological Process: cellular component organization (GO:0016043);; Biological Process: regulation of d…	--	--	--	--	Helix-loop-helix DNA-binding domain	Transcription factor bHLH96 GN=T9N14.4 OS=Arabidopsis thaliana (Mouse-ear cress) PE=2 SV=1	K	Transcription	PREDICTED: transcription factor bHLH96-like [Solanum lycopersicum]	cellular component: cell (GO:0005623);; cellular component: organelle (GO:0043226);; cellular component: cell part (GO:0044464);; biological process: metabolic process (GO:0008152);; biological process: cellular process (GO:0009987);; biological process: biological regulation (GO:0065007);; biological process: response to stimulus (GO:0050896);; biological process: developmental process (GO:00325…
Solanum_tuberosum_newGene_6715	--	1.08533	26	0.963129	26	1.08636	26	6.98572	161	7.46092	152	5.66896	122	9.79602e-08	2.71294	up	--	--	Molecular Function: transcription corepressor activity (GO:0003714);; Cellular Component: nucleus (GO:0005634);; Biological Process: response to wounding (GO:0009611);; Biological Process: regulation of defense response (GO:0031347);; Biological Process: negative regulation of nucleic acid-templated transcription (GO:1903507);; Biological Process: regulation of jasmonic acid mediated signaling pa…	--	--	--	--	Divergent CCT motif;; tify domain	Protein TIFY 5A OS=Arabidopsis thaliana OX=3702 GN=TIFY5A PE=1 SV=1	S	Function unknown	PREDICTED: protein TIFY 5A-like [Solanum tuberosum]	molecular function: transcription factor activity, protein binding (GO:0000988);; biological process: biological regulation (GO:0065007);; cellular component: cell (GO:0005623);; cellular component: organelle (GO:0043226);; cellular component: cell part (GO:0044464);; biological process: response to stimulus (GO:0050896)
PGSC0003DMG400018215	Germin 12	11.2919	291	19.6855	574	14.833	382	2.28353	59	2.71274	61	2.50883	60	4.53921e-06	-2.54265	down	--	--	Cellular Component: extracellular region (GO:0005576);; Cellular Component: cell wall (GO:0005618);; Biological Process: oligopeptide transport (GO:0006857);; Biological Process: response to salt stress (GO:0009651);; Cellular Component: cytoplasmic vesicle (GO:0016023);; Molecular Function: manganese ion binding (GO:0030145);; Cellular Component: extracellular matrix (GO:0031012);; Biological Pr…	--	--	--	--	Cupin;; Cupin domain	Germin-like protein subfamily 1 member 14 (Precursor) GN=At5g39110 OS=Arabidopsis thaliana (Mouse-ear cress) PE=3 SV=1	R	General function prediction only	germin-like protein subfamily 1 member 20 precursor [Solanum tuberosum]	cellular component: extracellular region (GO:0005576);; cellular component: cell (GO:0005623);; cellular component: cell part (GO:0044464);; biological process: localization (GO:0051179);; biological process: response to stimulus (GO:0050896);; molecular function: binding (GO:0005488);; cellular component: extracellular region part (GO:0044421);; biological process: metabolic process (GO:0008152)…
PGSC0003DMG400021838	Gene of unknown function	0.792063	15	0.854306	18	0.877908	17	6.45953	119	14.9542	244	8.07912	138	0.000769647	3.59502	up	--	--	--	--	--	--	--	--	--	--	--	--	--
PGSC0003DMG400024664	Conserved gene of unknown function	1.60363	77	1.66375	89	1.97813	95	0	0	0	0	0	0	1.52887e-16	#NAME?	down	--	--	--	--	--	--	--	--	--	S	Function unknown	PREDICTED: uncharacterized protein LOC101262301 [Solanum lycopersicum]	--
Solanum_tuberosum_newGene_9559	--	0.083074	3	0.221743	8	0.083158	3	1.56284	48	1.08281	30	1.15809	33	4.66927e-05	3.22425	up	[I]	Lipid transport and metabolism	Biological Process: metabolic process (GO:0008152);; Molecular Function: carboxylic ester hydrolase activity (GO:0052689);;	--	--	[V]	Defense mechanisms	alpha/beta hydrolase fold	Probable carboxylesterase 18 OS=Arabidopsis thaliana OX=3702 GN=CXE18 PE=1 SV=1	I	Lipid transport and metabolism	PREDICTED: probable carboxylesterase 18 [Solanum tuberosum]	biological process: metabolic process (GO:0008152);; molecular function: catalytic activity (GO:0003824)
PGSC0003DMG400010112	Conserved gene of unknown function	2.57404	61	3.5077	93	2.44412	58	19.5441	463	35.1294	735	24.5785	539	2.13234e-07	3.30174	up	--	--	--	--	--	--	--	--	--	S	Function unknown	PREDICTED: uncharacterized protein LOC101509147 [Cicer arietinum]	--
PGSC0003DMG400000685	Zinc finger protein	0.043436	3	0	0	0.303115	15	19.4989	910	9.2744	383	17.3058	749	9.88008e-19	6.99066	up	--	--	Biological Process: reproduction (GO:0000003);; Molecular Function: carboxylic ester hydrolase activity (GO:0004091);; Biological Process: lipid metabolic process (GO:0006629);; Biological Process: root morphogenesis (GO:0010015);; Biological Process: regulation of hormone levels (GO:0010817);; Biological Process: cell growth (GO:0016049);; Biological Process: cellular metabolic process (GO:00442…	--	--	--	--	GDSL-like Lipase/Acylhydrolase	GDSL esterase/lipase At2g04570 (Precursor) GN=At2g04570 OS=Arabidopsis thaliana (Mouse-ear cress) PE=2 SV=1	R	General function prediction only	PREDICTED: GDSL esterase/lipase At2g04570-like [Solanum lycopersicum]	biological process: reproduction (GO:0000003);; biological process: metabolic process (GO:0008152);; biological process: single-organism process (GO:0044699);; biological process: developmental process (GO:0032502);; biological process: biological regulation (GO:0065007);; biological process: cellular process (GO:0009987);; biological process: growth (GO:0040007);; cellular component: extracellul…
PGSC0003DMG400034309	Non-specific lipid-transfer protein	0.353396	11	0	0	0.149858	3	7.25208	205	1.95687	49	5.41755	143	7.83868e-05	4.99002	up	--	--	Biological Process: lipid transport (GO:0006869);; Cellular Component: anchored component of plasma membrane (GO:0046658);;	--	--	--	--	Probable lipid transfer;; Protease inhibitor/seed storage/LTP family	Uncharacterized GPI-anchored protein At1g27950 (Precursor) GN=At1g27950 OS=Arabidopsis thaliana (Mouse-ear cress) PE=1 SV=1	R	General function prediction only	PREDICTED: uncharacterized GPI-anchored protein At1g27950-like [Solanum lycopersicum]	biological process: single-organism process (GO:0044699);; biological process: localization (GO:0051179);; cellular component: cell (GO:0005623);; cellular component: membrane (GO:0016020);; cellular component: membrane part (GO:0044425);; cellular component: cell part (GO:0044464)
PGSC0003DMG400033650	Sterol desaturase	0.680734	49	0	0	0.517925	27	14.735	1026	2.63194	161	8.76587	566	0.00490213	4.67312	up	[I]	Lipid transport and metabolism	Molecular Function: iron ion binding (GO:0005506);; Cellular Component: mitochondrion (GO:0005739);; Biological Process: lipid metabolic process (GO:0006629);; Biological Process: fatty acid biosynthetic process (GO:0006633);; Biological Process: response to water deprivation (GO:0009414);; Biological Process: wax biosynthetic process (GO:0010025);; Biological Process: cutin biosynthetic process …	K15404|0|sot:102593084|K15404 aldehyde decarbonylase [EC:4.1.99.5] | (RefSeq) protein ECERIFERUM 1-like	Cutin, suberine and wax biosynthesis (ko00073)	--	--	WAX2 C-terminal domain;; Fatty acid hydroxylase superfamily	Protein ECERIFERUM 1 GN=CER1 OS=Arabidopsis thaliana (Mouse-ear cress) PE=1 SV=1	I	Lipid transport and metabolism	PREDICTED: protein ECERIFERUM 1-like [Solanum lycopersicum]	molecular function: binding (GO:0005488);; cellular component: cell (GO:0005623);; cellular component: organelle (GO:0043226);; cellular component: cell part (GO:0044464);; biological process: metabolic process (GO:0008152);; biological process: single-organism process (GO:0044699);; biological process: cellular process (GO:0009987);; biological process: response to stimulus (GO:0050896);; cellul…
PGSC0003DMG400001478	Conserved gene of unknown function	0.566999	12	0.258776	7	0.096269	3	1.52436	33	3.06523	58	2.1331	42	0.000212504	2.86215	up	--	--	Cellular Component: membrane (GO:0016020);; Biological Process: secretion by cell (GO:0032940);; Cellular Component: intracellular membrane-bounded organelle (GO:0043231);; Biological Process: multi-organism process (GO:0051704);; Biological Process: regulation of amino acid export (GO:0080143);;	--	--	--	--	--	Protein GLUTAMINE DUMPER 2 GN=GDU2 OS=Arabidopsis thaliana (Mouse-ear cress) PE=2 SV=1	S	Function unknown	PREDICTED: protein GLUTAMINE DUMPER 1-like [Fragaria vesca subsp. vesca]	cellular component: membrane (GO:0016020);; biological process: cellular process (GO:0009987);; biological process: single-organism process (GO:0044699);; biological process: localization (GO:0051179);; cellular component: cell (GO:0005623);; cellular component: organelle (GO:0043226);; cellular component: cell part (GO:0044464);; biological process: multi-organism process (GO:0051704);; biologic…
PGSC0003DMG400003456	TdcA1-ORF2 protein	0.428832	19	0.409907	19	0.321475	9	1.69146	76	2.61634	101	1.02173	43	0.00715773	2.48496	up	--	--	--	--	--	--	--	Domain of unknown function (DUF4216)	Protein ycf2 GN=ycf2-B OS=Oenothera parviflora (Small-flowered evening primrose) PE=3 SV=1	S	Function unknown	PREDICTED: uncharacterized protein LOC101501585 [Cicer arietinum]	--
Solanum_tuberosum_newGene_9629	--	14.7561	473	17.1195	608	14.0481	448	1.54304	50	2.20807	63	2.02057	60	8.8264e-17	-2.88969	down	--	--	Molecular Function: peroxidase activity (GO:0004601);; Cellular Component: extracellular region (GO:0005576);; Biological Process: response to oxidative stress (GO:0006979);; Molecular Function: heme binding (GO:0020037);; Biological Process: hydrogen peroxide catabolic process (GO:0042744);; Molecular Function: metal ion binding (GO:0046872);; Biological Process: oxidation-reduction process (GO:…	K00430|0|sot:102592776|K00430 peroxidase [EC:1.11.1.7] | (RefSeq) cationic peroxidase 1-like	Phenylpropanoid biosynthesis (ko00940)	--	--	Peroxidase	Cationic peroxidase 1 OS=Arachis hypogaea OX=3818 GN=PNC1 PE=1 SV=2	S	Function unknown	PREDICTED: cationic peroxidase 1-like [Solanum tuberosum]	molecular function: catalytic activity (GO:0003824);; molecular function: antioxidant activity (GO:0016209);; biological process: metabolic process (GO:0008152);; biological process: cellular process (GO:0009987);; biological process: single-organism process (GO:0044699);; biological process: response to stimulus (GO:0050896);; biological process: detoxification (GO:0098754);; cellular component:…
PGSC0003DMG400020653	Early tobacco anther 1	0.48342	15	0	0	0.331655	11	4.95136	152	1.93689	53	5.25213	150	3.5166e-05	3.9468	up	[S]	Function unknown	Cellular Component: cytoplasm (GO:0005737);;	--	--	--	--	--	Uncharacterized protein At5g48480 GN=At5g48480 OS=Arabidopsis thaliana (Mouse-ear cress) PE=1 SV=1	S	Function unknown	PREDICTED: uncharacterized protein At5g48480-like [Solanum lycopersicum]	cellular component: cell (GO:0005623);; cellular component: cell part (GO:0044464)
PGSC0003DMG400019336	Conserved gene of unknown function	1.48169	52	1.99452	77	1.51233	53	0.201715	8	0.121781	4	0.478713	16	0.000536344	-2.46634	down	--	--	Molecular Function: protein binding (GO:0005515);; Cellular Component: endosome (GO:0005768);; Biological Process: cellular process (GO:0009987);; Cellular Component: intracellular membrane-bounded organelle (GO:0043231);;	K12183|0|sly:101266865|K12183 ESCRT-I complex subunit TSG101 | (RefSeq) protein ELC-like	Endocytosis (ko04144)	[OU]	Posttranslational modification, protein turnover, chaperones;; Intracellular trafficking, secretion, and vesicular transport	UEV domain;; Vps23 core domain	Protein ELC-like GN=MAC12.18 OS=Arabidopsis thaliana (Mouse-ear cress) PE=1 SV=1	OU	Posttranslational modification, protein turnover, chaperones;; Intracellular trafficking, secretion, and vesicular transport	PREDICTED: protein ELC-like [Solanum lycopersicum]	molecular function: binding (GO:0005488);; cellular component: cell (GO:0005623);; cellular component: organelle (GO:0043226);; cellular component: cell part (GO:0044464);; biological process: cellular process (GO:0009987)
PGSC0003DMG400028624	Small heat-shock protein	14.6973	456	5.23493	180	10.2558	317	57.0382	1767	44.8837	1229	51.8889	1489	1.57799e-27	2.44548	up	[O]	Posttranslational modification, protein turnover, chaperones	Biological Process: protein folding (GO:0006457);; Cellular Component: plastid (GO:0009536);; Biological Process: response to high light intensity (GO:0009644);; Biological Process: heat acclimation (GO:0010286);; Biological Process: response to hydrogen peroxide (GO:0042542);; Cellular Component: intracellular membrane-bounded organelle (GO:0043231);; Cellular Component: cytoplasmic part (GO:004…	K13993|1.12018e-138|sot:102578969|K13993 HSP20 family protein | (RefSeq) 26.5 kDa heat shock protein, mitochondrial	Protein processing in endoplasmic reticulum (ko04141)	[O]	Posttranslational modification, protein turnover, chaperones	Hsp20/alpha crystallin family	26.5 kDa heat shock protein, mitochondrial (Precursor) GN=HSP26.5 OS=Arabidopsis thaliana (Mouse-ear cress) PE=2 SV=1	O	Posttranslational modification, protein turnover, chaperones	PREDICTED: 26.5 kDa heat shock protein, mitochondrial-like isoform 2 [Solanum lycopersicum]	biological process: cellular process (GO:0009987);; cellular component: cell (GO:0005623);; cellular component: organelle (GO:0043226);; cellular component: cell part (GO:0044464);; biological process: response to stimulus (GO:0050896);; biological process: cellular component organization or biogenesis (GO:0071840)
PGSC0003DMG400002176	Glutathione S-transferase	0.943161	30	1.07723	38	0.998723	32	0	0	0	0	0	0	6.50209e-09	#NAME?	down	[O]	Posttranslational modification, protein turnover, chaperones	Molecular Function: glutathione transferase activity (GO:0004364);; Cellular Component: cytosol (GO:0005829);; Cellular Component: plasma membrane (GO:0005886);; Biological Process: fatty acid beta-oxidation (GO:0006635);; Biological Process: response to oxidative stress (GO:0006979);; Biological Process: toxin catabolic process (GO:0009407);; Cellular Component: plasmodesma (GO:0009506);; Biolog…	K00799|1.47348e-152|sot:102601385|K00799 glutathione S-transferase [EC:2.5.1.18] | (RefSeq) probable glutathione S-transferase	Glutathione metabolism (ko00480)	[O]	Posttranslational modification, protein turnover, chaperones	Glutathione S-transferase, N-terminal domain;; Glutathione S-transferase, N-terminal domain;; Glutathione S-transferase, N-terminal domain;; Glutathione S-transferase, C-terminal domain;; Glutaredoxin	Probable glutathione S-transferase OS=Nicotiana tabacum (Common tobacco) PE=2 SV=1	O	Posttranslational modification, protein turnover, chaperones	glutathione S-transferase-like protein [Solanum tuberosum]	molecular function: catalytic activity (GO:0003824);; cellular component: cell (GO:0005623);; cellular component: cell part (GO:0044464);; cellular component: membrane (GO:0016020);; biological process: metabolic process (GO:0008152);; biological process: cellular process (GO:0009987);; biological process: single-organism process (GO:0044699);; biological process: response to stimulus (GO:0050896…
PGSC0003DMG402031237	Non-specific lipid-transfer protein	4.51199	87	0.236263	5	2.83824	56	43.0158	728	15.0763	239	38.1765	635	5.97651e-05	3.61128	up	--	--	Biological Process: lipid transport (GO:0006869);; Biological Process: response to stress (GO:0006950);; Biological Process: defense response (GO:0006952);; Molecular Function: lipid binding (GO:0008289);; Biological Process: response to biotic stimulus (GO:0009607);; Cellular Component: cytoplasmic vesicle (GO:0016023);; Biological Process: multi-organism process (GO:0051704);;	--	--	--	--	Protease inhibitor/seed storage/LTP family	Non-specific lipid-transfer protein 1 (Precursor) GN=LTP1 OS=Solanum pennellii (Tomato) PE=3 SV=1	T	Signal transduction mechanisms	non-specific lipid transfer protein 2 [Solanum tuberosum]	biological process: single-organism process (GO:0044699);; biological process: localization (GO:0051179);; biological process: response to stimulus (GO:0050896);; molecular function: binding (GO:0005488);; biological process: multi-organism process (GO:0051704)
PGSC0003DMG400003257	Taxane 13-alpha-hydroxylase cytochrome P450	0.911986	49	0.2883	19	0.846661	40	10.0606	583	3.91564	199	7.02007	376	1.94247e-05	3.60287	up	[Q]	Secondary metabolites biosynthesis, transport and catabolism	Molecular Function: monooxygenase activity (GO:0004497);; Molecular Function: binding (GO:0005488);; Cellular Component: endoplasmic reticulum (GO:0005783);; Biological Process: response to stress (GO:0006950);; Biological Process: metabolic process (GO:0008152);; Biological Process: lipid biosynthetic process (GO:0008610);; Biological Process: response to UV (GO:0009411);; Biological Process: re…	K20667|0|sot:102594160|K20667 beta-amyrin 28-monooxygenase [EC:1.14.13.201] | (RefSeq) beta-amyrin 28-oxidase-like	--	[QI]	Secondary metabolites biosynthesis, transport and catabolism;; Lipid transport and metabolism	Cytochrome P450	Cytochrome P450 716B1 GN=CYP716B1 OS=Picea sitchensis (Sitka spruce) PE=2 SV=1	Q	Secondary metabolites biosynthesis, transport and catabolism	PREDICTED: cytochrome P450 716B1-like [Solanum lycopersicum]	molecular function: catalytic activity (GO:0003824);; biological process: metabolic process (GO:0008152);; biological process: single-organism process (GO:0044699);; molecular function: binding (GO:0005488);; cellular component: cell (GO:0005623);; cellular component: organelle (GO:0043226);; cellular component: cell part (GO:0044464);; biological process: response to stimulus (GO:0050896);; biol…
PGSC0003DMG400006442	Early light inducible protein	22.607	923	8.41083	407	14.6312	635	104.302	4252	56.8212	2193	104.938	4013	3.0875e-08	2.61592	up	--	--	Biological Process: response to cold (GO:0009409);; Cellular Component: chloroplast thylakoid membrane (GO:0009535);; Biological Process: anthocyanin-containing compound biosynthetic process (GO:0009718);; Biological Process: response to sucrose (GO:0009744);; Biological Process: positive regulation of seed germination (GO:0010030);; Biological Process: photoprotection (GO:0010117);; Biological P…	--	--	--	--	Chlorophyll A-B binding protein	Early light-induced protein, chloroplastic (Precursor) OS=Pisum sativum (Garden pea) PE=2 SV=1	S	Function unknown	PREDICTED: early light-induced protein, chloroplastic-like isoform 1 [Solanum lycopersicum]	biological process: response to stimulus (GO:0050896);; cellular component: cell (GO:0005623);; cellular component: membrane (GO:0016020);; cellular component: organelle (GO:0043226);; cellular component: organelle part (GO:0044422);; cellular component: cell part (GO:0044464);; biological process: metabolic process (GO:0008152);; biological process: single-organism process (GO:0044699);; biologi…
PGSC0003DMG400016551	Conserved gene of unknown function	16.48	528	19.3469	610	14.6833	513	75.8245	3414	116.865	3336	75.0928	2741	5.78311e-36	2.76201	up	--	--	--	--	--	--	--	Cleavage site for pathogenic type III effector avirulence factor Avr	--	S	Function unknown	PREDICTED: uncharacterized protein LOC101256083 [Solanum lycopersicum]	--
PGSC0003DMG400010395	Conserved gene of unknown function	0.193903	5	0.446348	11	0.547185	13	2.85352	59	5.57193	110	3.27277	64	0.000637649	3.27074	up	--	--	--	--	--	--	--	--	--	S	Function unknown	PREDICTED: uncharacterized protein LOC101263264 [Solanum lycopersicum]	--
PGSC0003DMG400028124	Alpha/beta fold family protein hydrolase	0.422674	10	0.205269	11	0.575487	13	2.60909	78	1.48907	31	1.51776	46	0.000584903	2.38286	up	[R]	General function prediction only	Cellular Component: cytoplasmic vesicle (GO:0016023);; Molecular Function: hydrolase activity (GO:0016787);;	--	--	[R]	General function prediction only	Alpha/beta hydrolase family;; alpha/beta hydrolase fold;; Alpha/beta hydrolase family;; Serine hydrolase;; Uncharacterised conserved protein (DUF2305)	--	R	General function prediction only	PREDICTED: uncharacterized protein LOC101262576 [Solanum lycopersicum]	molecular function: catalytic activity (GO:0003824)
PGSC0003DMG400030810	Conserved gene of unknown function	53.1475	2064	48.4237	2087	52.2584	2021	295.557	11478	265.138	9104	258.671	9308	6.39311e-36	2.50305	up	--	--	Cellular Component: plant-type cell wall (GO:0009505);; Biological Process: response to brassinosteroid (GO:0009741);;	--	--	--	--	Phosphate-induced protein 1 conserved region	--	R	General function prediction only	PREDICTED: uncharacterized protein LOC100264214 [Vitis vinifera]	cellular component: cell (GO:0005623);; cellular component: cell part (GO:0044464);; biological process: response to stimulus (GO:0050896)
PGSC0003DMG400023272	Elongation factor 1-alpha	19.8488	1147	15.6425	1005	2.78339	161	0.013435	1	0.115953	6	0.485846	27	0.00124539	-5.80234	down	[J]	Translation, ribosomal structure and biogenesis	Molecular Function: translation elongation factor activity (GO:0003746);; Molecular Function: GTPase activity (GO:0003924);; Molecular Function: calmodulin binding (GO:0005516);; Molecular Function: GTP binding (GO:0005525);; Cellular Component: nucleolus (GO:0005730);; Cellular Component: cytoplasm (GO:0005737);; Cellular Component: mitochondrion (GO:0005739);; Cellular Component: vacuole (GO:00…	K03231|0|sot:102600998|K03231 elongation factor 1-alpha | (RefSeq) elongation factor 1-alpha	RNA transport (ko03013)	[J]	Translation, ribosomal structure and biogenesis	Elongation factor Tu GTP binding domain;; Elongation factor Tu C-terminal domain;; Elongation factor Tu domain 2	Elongation factor 1-alpha OS=Solanum lycopersicum (Tomato) PE=2 SV=1	J	Translation, ribosomal structure and biogenesis	elongation factor 1-alpha-like [Solanum tuberosum]	molecular function: binding (GO:0005488);; biological process: metabolic process (GO:0008152);; biological process: cellular process (GO:0009987);; molecular function: catalytic activity (GO:0003824);; cellular component: cell (GO:0005623);; cellular component: organelle (GO:0043226);; cellular component: organelle part (GO:0044422);; cellular component: cell part (GO:0044464);; cellular componen…
PGSC0003DMG400013898	Hcr2-0B	0.1676	18	0.124231	15	0.059745	7	2.36607	241	0.567413	52	1.64545	156	0.0041368	3.67854	up	[S]	Function unknown	Biological Process: polysaccharide biosynthetic process (GO:0000271);; Molecular Function: protein kinase activity (GO:0004672);; Molecular Function: protein binding (GO:0005515);; Biological Process: protein phosphorylation (GO:0006468);; Biological Process: defense response (GO:0006952);; Biological Process: immune response (GO:0006955);; Biological Process: epidermis development (GO:0008544);;…	--	--	[R]	General function prediction only	Leucine Rich repeats (2 copies);; Leucine rich repeat;; Leucine Rich Repeat;; Leucine Rich repeat;; Leucine rich repeat;; Leucine rich repeat N-terminal domain	Receptor-like protein 12 (Precursor) GN=RLP12 OS=Arabidopsis thaliana (Mouse-ear cress) PE=2 SV=2	T	Signal transduction mechanisms	PREDICTED: probable LRR receptor-like serine/threonine-protein kinase At4g08850-like [Solanum lycopersicum]	biological process: metabolic process (GO:0008152);; biological process: single-organism process (GO:0044699);; molecular function: catalytic activity (GO:0003824);; biological process: cellular process (GO:0009987);; molecular function: binding (GO:0005488);; biological process: response to stimulus (GO:0050896);; biological process: immune system process (GO:0002376);; biological process: devel…
Solanum_tuberosum_newGene_11263	--	0.025608	3	0.023076	3	0.025725	3	0.650211	52	0.703153	50	0.634716	47	3.19637e-08	4.2847	up	--	--	--	--	--	--	--	--	--	--	--	--	--
PGSC0003DMG400010117	Gene of unknown function	2.11733	104	0.678606	32	1.15933	59	14.9561	802	4.31123	203	10.5528	527	0.00388616	3.14785	up	--	--	Cellular Component: cytoplasm (GO:0005737);; Molecular Function: O-acyltransferase activity (GO:0008374);; Biological Process: phenylpropanoid biosynthetic process (GO:0009699);; Biological Process: embryo development ending in seed dormancy (GO:0009793);; Biological Process: flavonoid biosynthetic process (GO:0009813);; Biological Process: trichome morphogenesis (GO:0010090);; Biological Process…	K19747|0|sot:102581988|K19747 BAHD acyltransferase [EC:2.3.1.-] | (RefSeq) BAHD acyltransferase DCR	--	--	--	Transferase family	BAHD acyltransferase DCR GN=MRO11.2 OS=Arabidopsis thaliana (Mouse-ear cress) PE=2 SV=1	S	Function unknown	PREDICTED: BAHD acyltransferase DCR-like [Solanum lycopersicum]	cellular component: cell (GO:0005623);; cellular component: cell part (GO:0044464);; molecular function: catalytic activity (GO:0003824);; biological process: metabolic process (GO:0008152);; biological process: cellular process (GO:0009987);; biological process: single-organism process (GO:0044699);; biological process: reproduction (GO:0000003);; biological process: reproductive process (GO:002…
PGSC0003DMG400026967	Kunitz-type protease inhibitor KPI-D12	0	0	0.297418	9	0.163683	4	2.27141	56	3.35692	73	1.83016	42	1.10403e-07	3.99406	up	--	--	Molecular Function: peptidase inhibitor activity (GO:0030414);;	--	--	--	--	Trypsin and protease inhibitor	Miraculin (Precursor) OS=Synsepalum dulcificum (Miracle fruit) PE=1 SV=3	R	General function prediction only	PREDICTED: miraculin-like [Solanum lycopersicum]	molecular function: molecular function regulator (GO:0098772);; biological process: biological regulation (GO:0065007)
PGSC0003DMG400041029	Bcl-2-associated athanogene	10.7433	394	6.80794	277	8.20308	299	95.9239	3510	87.3007	2824	96.3056	3265	4.04541e-61	3.53247	up	--	--	Biological Process: response to stress (GO:0006950);; Biological Process: response to temperature stimulus (GO:0009266);; Biological Process: cellular process (GO:0009987);; Biological Process: single-organism process (GO:0044699);;	--	--	--	--	BAG domain;; IQ calmodulin-binding motif	BAG family molecular chaperone regulator 5, mitochondrial (Precursor) GN=BAG5 OS=Arabidopsis thaliana (Mouse-ear cress) PE=1 SV=1	S	Function unknown	Uncharacterized protein TCM_008586 [Theobroma cacao]	biological process: response to stimulus (GO:0050896);; biological process: cellular process (GO:0009987);; biological process: single-organism process (GO:0044699)
PGSC0003DMG400020681	Early nodulin	59.0539	1150	75.2216	1625	69.1895	1340	349.032	6774	466.97	8021	378.932	6820	4.33695e-18	2.64276	up	--	--	--	--	--	--	--	Early nodulin 93 ENOD93 protein	Early nodulin-93 OS=Glycine max (Soybean) PE=2 SV=1	S	Function unknown	PREDICTED: early nodulin-93-like [Solanum lycopersicum]	--
PGSC0003DMG400007073	Epidermis-specific secreted glycoprotein EP1	29.1344	1141	37.139	1613	30.0042	1169	169.869	6648	194.731	6738	188.23	6825	3.59075e-38	2.61058	up	--	--	Molecular Function: protein kinase activity (GO:0004672);; Molecular Function: binding (GO:0005488);; Cellular Component: extracellular region (GO:0005576);; Biological Process: protein phosphorylation (GO:0006468);; Biological Process: water transport (GO:0006833);; Cellular Component: membrane (GO:0016020);; Cellular Component: cell part (GO:0044464);;	--	--	--	--	D-mannose binding lectin	Epidermis-specific secreted glycoprotein EP1 (Precursor) GN=EP1 OS=Daucus carota (Carrot) PE=1 SV=1	--	--	PREDICTED: epidermis-specific secreted glycoprotein EP1-like [Solanum lycopersicum]	molecular function: catalytic activity (GO:0003824);; biological process: metabolic process (GO:0008152);; biological process: cellular process (GO:0009987);; molecular function: binding (GO:0005488);; cellular component: extracellular region (GO:0005576);; biological process: single-organism process (GO:0044699);; biological process: localization (GO:0051179);; cellular component: membrane (GO:0…
PGSC0003DMG400011649	Monovalent cation:proton antiporter	0.205724	19	0.164135	17	0.2283	21	1.23654	109	1.62304	127	1.54569	127	8.31775e-08	2.91191	up	[P]	Inorganic ion transport and metabolism	Cellular Component: plasma membrane (GO:0005886);; Biological Process: potassium ion transport (GO:0006813);; Biological Process: sodium ion transport (GO:0006814);; Biological Process: regulation of pH (GO:0006885);; Molecular Function: potassium ion transmembrane transporter activity (GO:0015079);; Biological Process: ion transmembrane transport (GO:0034220);; Biological Process: response to ch…	--	--	[P]	Inorganic ion transport and metabolism	Sodium/hydrogen exchanger family;; Universal stress protein family	Cation/H(+) antiporter 3 GN=MRN17.13 OS=Arabidopsis thaliana (Mouse-ear cress) PE=2 SV=1	P	Inorganic ion transport and metabolism	PREDICTED: cation/H(+) antiporter 3-like [Solanum lycopersicum]	cellular component: cell (GO:0005623);; cellular component: membrane (GO:0016020);; cellular component: cell part (GO:0044464);; biological process: localization (GO:0051179);; biological process: biological regulation (GO:0065007);; molecular function: transporter activity (GO:0005215);; biological process: response to stimulus (GO:0050896);; cellular component: organelle (GO:0043226);; biologic…
PGSC0003DMG400011021	CPRD49	2.24513	58	2.01134	58	1.44213	37	0.346953	9	0	0	0.247451	6	4.5955e-05	-3.18521	down	[E]	Amino acid transport and metabolism	Molecular Function: carboxylic ester hydrolase activity (GO:0004091);; Biological Process: vegetative to reproductive phase transition of meristem (GO:0010228);; Molecular Function: hydrolase activity (GO:0016787);; Biological Process: protein desumoylation (GO:0016926);; Cellular Component: apoplast (GO:0048046);; Biological Process: hydrogen peroxide biosynthetic process (GO:0050665);;	--	--	[I]	Lipid transport and metabolism	GDSL-like Lipase/Acylhydrolase;; GDSL-like Lipase/Acylhydrolase family	GDSL esterase/lipase CPRD49 (Precursor) GN=CPRD49 OS=Arabidopsis thaliana (Mouse-ear cress) PE=2 SV=1	E	Amino acid transport and metabolism	PREDICTED: GDSL esterase/lipase CPRD49-like [Solanum lycopersicum]	biological process: reproduction (GO:0000003);; biological process: reproductive process (GO:0022414);; biological process: developmental process (GO:0032502);; molecular function: catalytic activity (GO:0003824);; biological process: metabolic process (GO:0008152);; biological process: cellular process (GO:0009987);; cellular component: extracellular region (GO:0005576)
Solanum_tuberosum_newGene_5384	--	2.22106	38	4.09208	77	4.16488	70	0.360991	7	0	0	0.128135	2	8.3471e-08	-4.22776	down	--	--	Biological Process: defense response (GO:0006952);;	--	--	--	--	--	Defensin-like protein 19 OS=Arabidopsis thaliana OX=3702 GN=PDF1.4 PE=3 SV=2	--	--	PREDICTED: defensin-like protein 19 [Nicotiana sylvestris]	biological process: response to stimulus (GO:0050896)
PGSC0003DMG400030405	Heat shock cognate 70 kDa protein 1	162.188	11783	145.578	11736	151.582	10962	933.02	67779	797.625	51230	865.861	58278	1.94378e-31	2.58854	up	[O]	Posttranslational modification, protein turnover, chaperones	Molecular Function: protease binding (GO:0002020);; Molecular Function: receptor activity (GO:0004872);; Molecular Function: KDEL sequence binding (GO:0005046);; Molecular Function: ATP binding (GO:0005524);; Cellular Component: cell wall (GO:0005618);; Cellular Component: mitochondrion (GO:0005739);; Cellular Component: vacuolar membrane (GO:0005774);; Cellular Component: endoplasmic reticulum l…	K03283|0|sot:102592347|K03283 heat shock 70kDa protein 1/8 | (RefSeq) heat shock cognate 70 kDa protein 1	Spliceosome (ko03040);; Protein processing in endoplasmic reticulum (ko04141);; Endocytosis (ko04144)	[O]	Posttranslational modification, protein turnover, chaperones	Hsp70 protein;; Hydantoinase/oxoprolinase;; NAD-specific glutamate dehydrogenase	Heat shock cognate 70 kDa protein 1 GN=HSC-I OS=Solanum lycopersicum (Tomato) PE=2 SV=1	O	Posttranslational modification, protein turnover, chaperones	heat shock protein 70 isoform 1 [Solanum lycopersicum]	molecular function: binding (GO:0005488);; molecular function: molecular transducer activity (GO:0060089);; cellular component: cell (GO:0005623);; cellular component: cell part (GO:0044464);; cellular component: organelle (GO:0043226);; cellular component: membrane (GO:0016020);; cellular component: organelle part (GO:0044422);; cellular component: membrane-enclosed lumen (GO:0031974);; biologic…
PGSC0003DMG400030339	17.6 kD class I small heat shock protein	25.4059	645	13.8238	389	19.3924	490	123.925	3142	130.817	2932	121.995	2866	3.96894e-40	2.78108	up	[O]	Posttranslational modification, protein turnover, chaperones	Cellular Component: cytoplasm (GO:0005737);; Biological Process: protein folding (GO:0006457);; Biological Process: response to stress (GO:0006950);; Biological Process: response to high light intensity (GO:0009644);; Biological Process: response to salt stress (GO:0009651);; Biological Process: heat acclimation (GO:0010286);; Biological Process: response to endoplasmic reticulum stress (GO:00349…	K13993|9.1152e-98|sot:102578786|K13993 HSP20 family protein | (RefSeq) HSP17.6, Sl20.1shsp; 17.6 kDa class I heat shock protein-like	Protein processing in endoplasmic reticulum (ko04141)	[O]	Posttranslational modification, protein turnover, chaperones	Hsp20/alpha crystallin family	17.6 kDa class I heat shock protein OS=Solanum peruvianum (Peruvian tomato) PE=2 SV=1	O	Posttranslational modification, protein turnover, chaperones	17.6 kDa class I small heat shock protein 20.1 [Solanum tuberosum]	cellular component: cell (GO:0005623);; cellular component: cell part (GO:0044464);; biological process: cellular process (GO:0009987);; biological process: response to stimulus (GO:0050896);; biological process: cellular component organization or biogenesis (GO:0071840)
Solanum_tuberosum_newGene_11505	--	0.462852	13	0.240755	8	0.427735	12	4.63227	128	5.1348	126	4.3477	113	4.20628e-11	3.70369	up	--	--	Cellular Component: histone acetyltransferase complex (GO:0000123);;	--	--	--	--	Potential DNA-binding domain	--	S	Function unknown	PREDICTED: uncharacterized protein LOC102604518 [Solanum tuberosum]	cellular component: cell (GO:0005623);; cellular component: membrane-enclosed lumen (GO:0031974);; cellular component: macromolecular complex (GO:0032991);; cellular component: organelle (GO:0043226);; cellular component: organelle part (GO:0044422);; cellular component: cell part (GO:0044464)
Solanum_tuberosum_newGene_8084	--	0.136019	12	0	0	0.084613	7	0.563356	47	0.650157	48	0.427393	33	6.81897e-05	2.96232	up	--	--	--	--	--	[R]	General function prediction only	--	--	S	Function unknown	PREDICTED: CLIP-associated protein-like [Nicotiana attenuata]	--
PGSC0003DMG400008985	Basic 7S globulin 2 small subunit	0.411437	17	0.427554	22	0.744846	36	9.36532	476	2.33837	89	6.12884	289	0.0092675	3.67923	up	--	--	Molecular Function: aspartic-type endopeptidase activity (GO:0004190);; Biological Process: proteolysis (GO:0006508);; Biological Process: defense response (GO:0006952);; Molecular Function: hydrolase activity (GO:0016787);; Biological Process: cellular metabolic process (GO:0044237);; Biological Process: single-organism metabolic process (GO:0044710);; Biological Process: regulation of cellular …	--	--	[O]	Posttranslational modification, protein turnover, chaperones	Xylanase inhibitor C-terminal;; Xylanase inhibitor N-terminal	Basic 7S globulin low kDa subunit (Precursor) GN=BG OS=Glycine max (Soybean) PE=1 SV=2	O	Posttranslational modification, protein turnover, chaperones	xyloglucan-specific endoglucanase inhibitor 1 [Solanum tuberosum]	molecular function: catalytic activity (GO:0003824);; biological process: metabolic process (GO:0008152);; biological process: response to stimulus (GO:0050896);; biological process: cellular process (GO:0009987);; biological process: single-organism process (GO:0044699);; biological process: biological regulation (GO:0065007);; biological process: multi-organism process (GO:0051704)
PGSC0003DMG400003551	Receptor kinase	0	0	0	0	0.015749	3	0.253827	33	0.264921	31	0.29082	35	4.35384e-08	5.23554	up	[S]	Function unknown	Biological Process: microtubule cytoskeleton organization (GO:0000226);; Biological Process: cytokinesis by cell plate formation (GO:0000911);; Biological Process: response to molecule of bacterial origin (GO:0002237);; Molecular Function: protein serine/threonine kinase activity (GO:0004674);; Molecular Function: protein binding (GO:0005515);; Molecular Function: ATP binding (GO:0005524);; Cellu…	--	--	--	--	Leucine Rich repeats (2 copies);; Leucine rich repeat;; Leucine Rich Repeat;; Protein kinase domain;; Protein tyrosine kinase;; Leucine Rich repeat;; Leucine rich repeat;; Leucine rich repeat N-terminal domain	Probable LRR receptor-like serine/threonine-protein kinase At4g36180 (Precursor) GN=At4g36180 OS=Arabidopsis thaliana (Mouse-ear cress) PE=1 SV=1	T	Signal transduction mechanisms	PREDICTED: probable LRR receptor-like serine/threonine-protein kinase At4g36180-like [Solanum lycopersicum]	biological process: cellular process (GO:0009987);; biological process: cellular component organization or biogenesis (GO:0071840);; biological process: single-organism process (GO:0044699);; biological process: response to stimulus (GO:0050896);; molecular function: catalytic activity (GO:0003824);; biological process: metabolic process (GO:0008152);; molecular function: binding (GO:0005488);; c…
Solanum_tuberosum_newGene_3867	--	0.11354	9	0.07008	7	0.115418	14	1.19074	73	1.01167	77	1.87942	81	4.75168e-07	3.17381	up	--	--	Cellular Component: integral component of membrane (GO:0016021);;	--	--	--	--	--	O-fucosyltransferase 16 OS=Arabidopsis thaliana OX=3702 GN=OFUT16 PE=2 SV=1	S	Function unknown	PREDICTED: uncharacterized protein At1g04910-like [Solanum tuberosum]	cellular component: membrane (GO:0016020);; cellular component: membrane part (GO:0044425)
PGSC0003DMG400030688	F-box-containing protein 1	0.255262	31	0.021708	5	0.296864	46	1.34518	110	2.52569	198	1.71324	130	0.00123574	2.65266	up	--	--	Molecular Function: protein kinase activity (GO:0004672);; Molecular Function: binding (GO:0005488);; Cellular Component: plasma membrane (GO:0005886);; Biological Process: polysaccharide metabolic process (GO:0005976);; Biological Process: cellular protein modification process (GO:0006464);; Biological Process: defense response (GO:0006952);; Biological Process: cell cycle (GO:0007049);; Biologi…	--	--	[R]	General function prediction only	Leucine Rich repeats (2 copies);; Leucine Rich repeat;; Leucine rich repeat;; Leucine Rich Repeat	F-box/LRR-repeat protein 3 GN=FBL3 OS=Arabidopsis thaliana (Mouse-ear cress) PE=2 SV=1	S	Function unknown	PREDICTED: internalin-A-like [Solanum lycopersicum]	molecular function: catalytic activity (GO:0003824);; biological process: metabolic process (GO:0008152);; biological process: cellular process (GO:0009987);; molecular function: binding (GO:0005488);; cellular component: cell (GO:0005623);; cellular component: membrane (GO:0016020);; cellular component: cell part (GO:0044464);; biological process: response to stimulus (GO:0050896);; biological p…
Solanum_tuberosum_newGene_6945	--	0	0	0	0	0	0	1.83801	51	1.9614	39	1.89879	37	2.776e-12	Inf	up	--	--	--	--	--	--	--	--	--	S	Function unknown	PREDICTED: uncharacterized protein LOC107061933 [Solanum tuberosum]	--
PGSC0003DMG402032203	Extensin	5.62288	165	6.598	186	5.39267	158	62.9147	1703	21.0076	535	35.0028	946	0.00242134	2.83606	up	--	--	Biological Process: defense response to insect (GO:0002213);; Molecular Function: single-stranded DNA binding (GO:0003697);; Molecular Function: RNA binding (GO:0003723);; Molecular Function: chitinase activity (GO:0004568);; Molecular Function: structural constituent of cell wall (GO:0005199);; Molecular Function: protein binding (GO:0005515);; Cellular Component: extracellular region (GO:000557…	--	--	--	--	--	Sulfated surface glycoprotein 185 (Precursor) OS=Volvox carteri (Green alga) PE=1 SV=1	--	--	Hop-interacting protein THI101 precursor [Solanum lycopersicum]	biological process: response to stimulus (GO:0050896);; molecular function: binding (GO:0005488);; molecular function: catalytic activity (GO:0003824);; molecular function: structural molecule activity (GO:0005198);; cellular component: extracellular region (GO:0005576);; biological process: metabolic process (GO:0008152);; cellular component: cell (GO:0005623);; cellular component: cell part (GO…
PGSC0003DMG400011247	Cation diffusion facilitator 9	0.323134	17	0.117058	4	0.315139	16	1.60414	69	1.84815	60	1.70481	62	7.57656e-05	2.57925	up	[P]	Inorganic ion transport and metabolism	Cellular Component: nucleus (GO:0005634);; Cellular Component: late endosome (GO:0005770);; Cellular Component: vacuole (GO:0005773);; Cellular Component: Golgi apparatus (GO:0005794);; Biological Process: cation transport (GO:0006812);; Molecular Function: cation transmembrane transporter activity (GO:0008324);; Biological Process: anthocyanin-containing compound biosynthetic process (GO:0009718…	--	--	[P]	Inorganic ion transport and metabolism	Cation efflux family	Metal tolerance protein 10 GN=MTP10 OS=Arabidopsis thaliana (Mouse-ear cress) PE=2 SV=1	P	Inorganic ion transport and metabolism	PREDICTED: metal tolerance protein 10-like [Solanum lycopersicum]	cellular component: cell (GO:0005623);; cellular component: organelle (GO:0043226);; cellular component: cell part (GO:0044464);; biological process: localization (GO:0051179);; molecular function: transporter activity (GO:0005215);; biological process: metabolic process (GO:0008152);; biological process: single-organism process (GO:0044699);; biological process: response to stimulus (GO:0050896)…
PGSC0003DMG400026592	Conserved gene of unknown function	1.52112	41	1.20225	36	0.852072	23	5.9435	159	10.5706	249	6.14353	152	0.000125507	2.74736	up	--	--	Cellular Component: nucleus (GO:0005634);;	--	--	--	--	Protein of unknown function (DUF581)	--	S	Function unknown	PREDICTED: uncharacterized protein LOC101246541 [Solanum lycopersicum]	cellular component: cell (GO:0005623);; cellular component: organelle (GO:0043226);; cellular component: cell part (GO:0044464)
PGSC0003DMG402016495	Stem 28 kDa glycoprotein	0.08501	5	0.000139	1	0.031662	2	5.45203	231	1.19522	45	3.32164	129	0.000274737	5.82426	up	--	--	Biological Process: defense response to insect (GO:0002213);; Molecular Function: acid phosphatase activity (GO:0003993);; Cellular Component: vacuole (GO:0005773);; Biological Process: response to oxidative stress (GO:0006979);; Biological Process: response to wounding (GO:0009611);; Molecular Function: hydrolase activity (GO:0016787);; Cellular Component: cytosolic ribosome (GO:0022626);; Biolo…	--	--	--	--	HAD superfamily, subfamily IIIB (Acid phosphatase)	Acid phosphatase 1 (Precursor) GN=APS1 OS=Solanum lycopersicum (Tomato) PE=2 SV=1	R	General function prediction only	putative acid phosphatase [Solanum tuberosum]	biological process: response to stimulus (GO:0050896);; molecular function: catalytic activity (GO:0003824);; biological process: metabolic process (GO:0008152);; biological process: cellular process (GO:0009987);; cellular component: cell (GO:0005623);; cellular component: organelle (GO:0043226);; cellular component: cell part (GO:0044464);; cellular component: macromolecular complex (GO:0032991)
PGSC0003DMG400020863	Harpin-induced 1	9.06342	607	10.5878	787	6.8628	458	0.058676	4	0.019386	2	4.38549	273	0.000400906	-2.46557	down	--	--	Cellular Component: nucleus (GO:0005634);; Cellular Component: plasmodesma (GO:0009506);; Cellular Component: anchored component of plasma membrane (GO:0046658);;	--	--	--	--	Late embryogenesis abundant protein	--	S	Function unknown	PREDICTED: uncharacterized protein LOC101268505 [Solanum lycopersicum]	cellular component: cell (GO:0005623);; cellular component: organelle (GO:0043226);; cellular component: cell part (GO:0044464);; cellular component: cell junction (GO:0030054);; cellular component: membrane (GO:0016020);; cellular component: membrane part (GO:0044425)
PGSC0003DMG400005884	Conserved gene of unknown function	0.21597	7	0	0	0.071676	3	3.5591	101	1.08224	27	1.69185	45	0.00238924	4.2668	up	--	--	--	--	--	--	--	Pollen proteins Ole e I like	--	S	Function unknown	PREDICTED: uncharacterized protein LOC101253793 isoform 3 [Solanum lycopersicum]	--
PGSC0003DMG400012838	Non-specific lipid-transfer protein	4.21435	84	0.87765	20	2.83256	57	43.324	843	20.7672	361	42.15	764	1.58345e-08	3.80205	up	--	--	Biological Process: lipid transport (GO:0006869);; Biological Process: response to stress (GO:0006950);; Biological Process: defense response (GO:0006952);; Molecular Function: lipid binding (GO:0008289);; Biological Process: response to biotic stimulus (GO:0009607);; Cellular Component: cytoplasmic vesicle (GO:0016023);; Biological Process: multi-organism process (GO:0051704);;	--	--	--	--	Protease inhibitor/seed storage/LTP family;; Probable lipid transfer	Non-specific lipid-transfer protein 2 (Precursor) OS=Nicotiana tabacum (Common tobacco) PE=3 SV=1	T	Signal transduction mechanisms	non-specific lipid transfer protein 2 [Solanum tuberosum]	biological process: single-organism process (GO:0044699);; biological process: localization (GO:0051179);; biological process: response to stimulus (GO:0050896);; molecular function: binding (GO:0005488);; biological process: multi-organism process (GO:0051704)
PGSC0003DMG400023962	Gene of unknown function	6.70288	389	6.06166	390	6.72422	388	0.567051	33	1.93411	100	0.97682	53	1.44401e-10	-2.36659	down	--	--	--	--	--	--	--	--	--	--	--	--	--
PGSC0003DMG400027729	Gene of unknown function	0.419346	33	0.126454	11	0.333222	26	1.35417	106	1.59962	111	1.40516	102	1.42025e-05	2.41298	up	--	--	--	--	--	--	--	--	--	--	--	--	--
PGSC0003DMG400012542	Conserved gene of unknown function	0	0	0.104871	7	0.116651	7	1.40768	74	0.957533	45	0.89685	44	2.11218e-07	3.76159	up	--	--	Molecular Function: O-acyltransferase activity (GO:0008374);; Biological Process: flavonoid biosynthetic process (GO:0009813);; Molecular Function: N-acyltransferase activity (GO:0016410);; Biological Process: cellular biosynthetic process (GO:0044249);; Biological Process: single-organism metabolic process (GO:0044710);; Biological Process: single-organism cellular process (GO:0044763);;	K13065|0|sot:102605429|K13065 shikimate O-hydroxycinnamoyltransferase [EC:2.3.1.133] | (RefSeq) acetyl-CoA-benzylalcohol acetyltransferase-like	Phenylpropanoid biosynthesis (ko00940);; Flavonoid biosynthesis (ko00941);; Stilbenoid, diarylheptanoid and gingerol biosynthesis (ko00945)	--	--	Transferase family	Salutaridinol 7-O-acetyltransferase GN=SALAT OS=Papaver somniferum (Opium poppy) PE=1 SV=1	S	Function unknown	acylsugar acetyltransferase [Solanum habrochaites]	molecular function: catalytic activity (GO:0003824);; biological process: metabolic process (GO:0008152);; biological process: cellular process (GO:0009987);; biological process: single-organism process (GO:0044699)
PGSC0003DMG400017918	Glycine-rich protein	0.844451	17	0	0	0.253238	6	28.568	572	7.46661	132	21.8947	406	1.03701e-05	5.7555	up	--	--	Molecular Function: nucleotide binding (GO:0000166);; Biological Process: defense response to insect (GO:0002213);; Molecular Function: RNA binding (GO:0003723);; Molecular Function: chitinase activity (GO:0004568);; Molecular Function: protein binding (GO:0005515);; Cellular Component: extracellular region (GO:0005576);; Cellular Component: nucleus (GO:0005634);; Biological Process: chitin catab…	--	--	--	--	Glycine rich protein family	Glycine-rich protein (Precursor) GN=GRP OS=Nicotiana tabacum (Common tobacco) PE=2 SV=1	--	--	PREDICTED: uncharacterized protein LOC101244811 [Solanum lycopersicum]	molecular function: binding (GO:0005488);; biological process: response to stimulus (GO:0050896);; molecular function: catalytic activity (GO:0003824);; cellular component: extracellular region (GO:0005576);; cellular component: cell (GO:0005623);; cellular component: organelle (GO:0043226);; cellular component: cell part (GO:0044464);; biological process: metabolic process (GO:0008152);; biologi…
PGSC0003DMG400026273	Glycoprotein X	3.82986	125	4.03275	146	4.62559	151	0.151001	5	0.227715	7	0.133018	5	3.10272e-13	-4.38148	down	--	--	Molecular Function: binding (GO:0005488);; Cellular Component: vacuolar membrane (GO:0005774);; Biological Process: steroid biosynthetic process (GO:0006694);; Biological Process: phosphorus metabolic process (GO:0006793);; Cellular Component: plant-type cell wall (GO:0009505);; Biological Process: response to salt stress (GO:0009651);; Biological Process: plant-type cell wall organization (GO:00…	--	--	--	--	--	Fasciclin-like arabinogalactan protein 14 (Precursor) GN=FLA14 OS=Arabidopsis thaliana (Mouse-ear cress) PE=2 SV=1	R	General function prediction only	PREDICTED: fasciclin-like arabinogalactan protein 14-like [Solanum lycopersicum]	molecular function: binding (GO:0005488);; cellular component: cell (GO:0005623);; cellular component: membrane (GO:0016020);; cellular component: organelle (GO:0043226);; cellular component: organelle part (GO:0044422);; cellular component: cell part (GO:0044464);; biological process: metabolic process (GO:0008152);; biological process: single-organism process (GO:0044699);; biological process: …
PGSC0003DMG402016112	Sinapyl alcohol dehydrogenase 2	0.111152	5	0	0	0.213592	8	4.86382	218	1.07753	43	3.60002	145	0.000407278	5.11236	up	[R]	General function prediction only	Biological Process: defense response to insect (GO:0002213);; Molecular Function: glutamate-cysteine ligase activity (GO:0004357);; Cellular Component: mitochondrion (GO:0005739);; Biological Process: gluconeogenesis (GO:0006094);; Biological Process: glycolytic process (GO:0006096);; Biological Process: glutathione biosynthetic process (GO:0006750);; Biological Process: amino acid transport (GO:…	K00083|0|sot:102595339|K00083 cinnamyl-alcohol dehydrogenase [EC:1.1.1.195] | (RefSeq) 8-hydroxygeraniol dehydrogenase-like	Phenylpropanoid biosynthesis (ko00940)	[Q]	Secondary metabolites biosynthesis, transport and catabolism	Alcohol dehydrogenase GroES-like domain;; Zinc-binding dehydrogenase	8-hydroxygeraniol dehydrogenase GN=10HGO OS=Catharanthus roseus (Madagascar periwinkle) PE=1 SV=1	Q	Secondary metabolites biosynthesis, transport and catabolism	PREDICTED: geraniol dehydrogenase 1-like [Solanum lycopersicum]	biological process: response to stimulus (GO:0050896);; molecular function: catalytic activity (GO:0003824);; cellular component: cell (GO:0005623);; cellular component: organelle (GO:0043226);; cellular component: cell part (GO:0044464);; biological process: metabolic process (GO:0008152);; biological process: single-organism process (GO:0044699);; biological process: cellular process (GO:000998…
Solanum_tuberosum_newGene_6611	--	0.666998	15	0	0	0.641912	19	4.2302	83	1.75308	45	2.1437	50	9.73478e-05	2.5644	up	--	--	--	--	--	--	--	Plant transposase (Ptta/En/Spm family)	--	--	--	PREDICTED: uncharacterized protein LOC102588207 [Solanum tuberosum]	--
Solanum_tuberosum_newGene_4283	--	2.11479	81	1.3241	56	2.52124	96	0.323684	13	0	0	0.450733	16	2.67164e-05	-2.83112	down	--	--	--	--	--	--	--	--	--	--	--	--	--
PGSC0003DMG400009153	Conserved gene of unknown function	1.55316	108	3.74297	256	2.34344	147	18.3761	1423	14.7673	1011	15.7132	1145	1.22241e-35	3.04461	up	--	--	Cellular Component: nucleus (GO:0005634);; Biological Process: microtubule nucleation (GO:0007020);; Molecular Function: transferase activity, transferring glycosyl groups (GO:0016757);;	K03691|0|sot:102584575|K03691 peptide-O-fucosyltransferase [EC:2.4.1.221] | (RefSeq) fut13; uncharacterized LOC102584575	Other types of O-glycan biosynthesis (ko00514)	--	--	GDP-fucose protein O-fucosyltransferase	--	S	Function unknown	PREDICTED: uncharacterized protein LOC101268664 [Solanum lycopersicum]	cellular component: cell (GO:0005623);; cellular component: organelle (GO:0043226);; cellular component: cell part (GO:0044464);; biological process: cellular process (GO:0009987);; biological process: cellular component organization or biogenesis (GO:0071840);; molecular function: catalytic activity (GO:0003824)
PGSC0003DMG401026315	C2H2 zinc finger protein FZF	0.178369	20	0.114157	14	0.148232	17	2.38914	262	4.27051	194	2.47665	251	5.02671e-18	4.01438	up	--	--	Molecular Function: metal ion binding (GO:0046872);;	K14816|4.03889e-178|sly:101267254|K14816 pre-60S factor REI1 | (RefSeq) cytoplasmic 60S subunit biogenesis factor REI1 homolog 1	--	[R]	General function prediction only	C2H2 type zinc-finger (2 copies)	--	R	General function prediction only	PREDICTED: zinc finger protein 622-like [Solanum lycopersicum]	molecular function: binding (GO:0005488)
PGSC0003DMG400014238	Electron transporter	0.944372	26	0.670149	21	1.03265	28	3.89789	106	4.39025	105	5.31513	133	8.27144e-06	2.43111	up	[C]	Energy production and conversion	Molecular Function: iron ion binding (GO:0005506);;	--	--	--	--	Rubredoxin	--	S	Function unknown	PREDICTED: uncharacterized protein LOC101245339 [Solanum lycopersicum]	molecular function: binding (GO:0005488)
Solanum_tuberosum_newGene_11490	--	1.14748	55	2.00036	107	1.68023	80	0.157468	8	0.149493	7	0.045747	3	2.11094e-07	-3.51497	down	--	--	--	--	--	--	--	--	--	--	--	--	--
Solanum_tuberosum_newGene_1007	--	0.816539	19	0.484134	12	0.632013	14	2.16245	49	3.78948	75	3.97455	82	0.000150863	2.44624	up	--	--	--	--	--	--	--	GRF zinc finger	--	--	--	PREDICTED: uncharacterized protein LOC107057951 [Solanum tuberosum]	--
Solanum_tuberosum_newGene_7810	--	0	0	0.071775	2	0	0	2.64523	35	2.80611	32	2.96386	36	5.6112e-09	5.98309	up	--	--	--	--	--	--	--	Plant transposase (Ptta/En/Spm family)	--	--	--	PREDICTED: uncharacterized protein LOC102594207 isoform X2 [Solanum tuberosum]	--
PGSC0003DMG401020176	Conserved gene of unknown function	0.763595	41	0.675256	40	0.861471	46	0.037634	3	0.150558	8	0.122402	7	0.001179	-2.54579	down	--	--	--	--	--	--	--	--	--	S	Function unknown	predicted protein [Populus trichocarpa]	--
PGSC0003DMG400027888	Cysteine proteinase 3	0	0	0.041679	3	0	0	14.8747	652	3.46297	134	9.96825	396	2.13234e-07	8.86352	up	--	--	Cellular Component: plant-type vacuole (GO:0000325);; Molecular Function: cysteine-type endopeptidase activity (GO:0004197);; Molecular Function: protein binding (GO:0005515);; Cellular Component: extracellular region (GO:0005576);; Cellular Component: nucleus (GO:0005634);; Cellular Component: vacuole (GO:0005773);; Cellular Component: cytosol (GO:0005829);; Biological Process: glycolytic proces…	K01366|0|sot:102579266|K01366 cathepsin H [EC:3.4.22.16] | (RefSeq) cysteine proteinase 3-like	--	[O]	Posttranslational modification, protein turnover, chaperones	Papain family cysteine protease;; Cathepsin propeptide inhibitor domain (I29);; Peptidase C1-like family	Cysteine proteinase 3 (Precursor) GN=CYP-3 OS=Solanum lycopersicum (Tomato) PE=1 SV=1	O	Posttranslational modification, protein turnover, chaperones	PREDICTED: cysteine proteinase 3-like [Solanum lycopersicum]	cellular component: cell (GO:0005623);; cellular component: organelle (GO:0043226);; cellular component: cell part (GO:0044464);; molecular function: catalytic activity (GO:0003824);; biological process: metabolic process (GO:0008152);; molecular function: binding (GO:0005488);; cellular component: extracellular region (GO:0005576);; biological process: cellular process (GO:0009987);; biological …
Solanum_tuberosum_newGene_1622	--	0.044489	3	0	0	0	0	2.3358	107	0.986977	40	1.37024	58	1.56799e-08	6.27176	up	--	--	--	--	--	[R]	General function prediction only	gag-polypeptide of LTR copia-type;; gag-polypeptide of LTR copia-type;; Retrotransposon gag protein	Retrovirus-related Pol polyprotein from transposon RE1 OS=Arabidopsis thaliana OX=3702 GN=RE1 PE=2 SV=1	L	Replication, recombination and repair	PREDICTED: uncharacterized protein LOC107059406, partial [Solanum tuberosum]	--
PGSC0003DMG400018844	Beta expansin 2	0.222099	9	0.396679	15	0	0	1.02317	35	1.31714	42	1.0123	32	0.00205161	2.46073	up	--	--	Cellular Component: extracellular region (GO:0005576);; Biological Process: plant-type cell wall organization (GO:0009664);; Cellular Component: cytoplasmic vesicle (GO:0016023);; Biological Process: cellular component organization (GO:0016043);; Biological Process: sexual reproduction (GO:0019953);; Biological Process: single-organism cellular process (GO:0044763);;	--	--	--	--	Rare lipoprotein A (RlpA)-like double-psi beta-barrel;; Pollen allergen	Expansin-B15 (Precursor) GN=OSJNBa0010H02.7 OS=Oryza sativa subsp. japonica (Rice) PE=3 SV=2	R	General function prediction only	beta expansin 2 precursor [Solanum tuberosum]	cellular component: extracellular region (GO:0005576);; biological process: cellular process (GO:0009987);; biological process: cellular component organization or biogenesis (GO:0071840);; biological process: reproduction (GO:0000003);; biological process: reproductive process (GO:0022414);; biological process: multi-organism process (GO:0051704);; biological process: single-organism process (GO:…
PGSC0003DMG400004677	Hydroxyproline-rich glycoprotein (HRGP)	1.40244	142	1.5729	193	1.05394	118	0.183233	22	0.058986	5	0.176369	20	2.09527e-08	-3.0671	down	--	--	Molecular Function: binding (GO:0005488);; Cellular Component: plant-type cell wall (GO:0009505);; Biological Process: post-embryonic development (GO:0009791);; Biological Process: pollen tube growth (GO:0009860);; Biological Process: trichoblast differentiation (GO:0010054);; Biological Process: response to stimulus (GO:0050896);;	--	--	--	--	Pollen proteins Ole e I like;; Extensin-like region	Extensin-2 (Precursor) GN=T14E10_160 OS=Arabidopsis thaliana (Mouse-ear cress) PE=2 SV=1	R	General function prediction only	PREDICTED: extensin-2-like [Cicer arietinum]	molecular function: binding (GO:0005488);; cellular component: cell (GO:0005623);; cellular component: cell part (GO:0044464);; biological process: multicellular organismal process (GO:0032501);; biological process: single-organism process (GO:0044699);; biological process: reproduction (GO:0000003);; biological process: cellular process (GO:0009987);; biological process: reproductive process (GO…
PGSC0003DMG400003932	CPD photolyase	0.36671	25	0.216524	15	0.40845	24	3.1023	184	2.05765	108	3.18993	173	9.6093e-10	3.06965	up	[L]	Replication, recombination and repair	Biological Process: photoreactive repair (GO:0000719);; Molecular Function: transcription factor activity, sequence-specific DNA binding (GO:0003700);; Molecular Function: deoxyribodipyrimidine photo-lyase activity (GO:0003904);; Molecular Function: DNA (6-4) photolyase activity (GO:0003914);; Cellular Component: nucleus (GO:0005634);; Biological Process: regulation of transcription, DNA-template…	K01669|0|sot:102578286|K01669 deoxyribodipyrimidine photo-lyase [EC:4.1.99.3] | (RefSeq) deoxyribodipyrimidine photo-lyase	--	[LT]	Replication, recombination and repair;; Signal transduction mechanisms	FAD binding domain of DNA photolyase;; DNA photolyase	Deoxyribodipyrimidine photo-lyase GN=F5O11.9 OS=Arabidopsis thaliana (Mouse-ear cress) PE=2 SV=1	L	Replication, recombination and repair	PREDICTED: deoxyribodipyrimidine photo-lyase-like [Solanum lycopersicum]	biological process: metabolic process (GO:0008152);; biological process: cellular process (GO:0009987);; biological process: response to stimulus (GO:0050896);; molecular function: nucleic acid binding transcription factor activity (GO:0001071);; biological process: biological regulation (GO:0065007);; molecular function: catalytic activity (GO:0003824);; cellular component: cell (GO:0005623);; c…
PGSC0003DMG402015074	Magnesium transporter	1.27865	51	0.481348	27	0.391064	19	3.46181	159	3.19686	134	3.53019	153	1.26003e-06	2.43152	up	--	--	Cellular Component: nucleus (GO:0005634);; Cellular Component: vacuole (GO:0005773);; Cellular Component: plasma membrane (GO:0005886);; Molecular Function: magnesium ion transmembrane transporter activity (GO:0015095);; Biological Process: magnesium ion transport (GO:0015693);; Cellular Component: integral component of membrane (GO:0016021);; Biological Process: transmembrane transport (GO:00550…	K16075|0|sot:102584523|K16075 magnesium transporter | (RefSeq) magnesium transporter MRS2-I-like	--	[P]	Inorganic ion transport and metabolism	CorA-like Mg2+ transporter protein	Magnesium transporter MRS2-I GN=MRS2-I OS=Oryza sativa subsp. indica (Rice) PE=2 SV=1	P	Inorganic ion transport and metabolism	PREDICTED: magnesium transporter MRS2-I-like [Solanum lycopersicum]	cellular component: cell (GO:0005623);; cellular component: organelle (GO:0043226);; cellular component: cell part (GO:0044464);; cellular component: membrane (GO:0016020);; molecular function: transporter activity (GO:0005215);; biological process: localization (GO:0051179);; cellular component: membrane part (GO:0044425)
PGSC0003DMG400000110	Wax synthase	2.16617	123	0.630525	38	1.12444	58	20.3371	1139	6.73063	334	15.0564	775	0.000258423	3.53992	up	--	--	Molecular Function: diacylglycerol O-acyltransferase activity (GO:0004144);; Cellular Component: endoplasmic reticulum (GO:0005783);; Biological Process: wax biosynthetic process (GO:0010025);; Molecular Function: long-chain-alcohol O-fatty-acyltransferase activity (GO:0047196);;	--	--	--	--	Protein of unknown function (DUF1298);; Wax ester synthase-like Acyl-CoA acyltransferase domain;; Condensation domain	O-acyltransferase WSD1 GN=WSD1 OS=Arabidopsis thaliana (Mouse-ear cress) PE=2 SV=1	S	Function unknown	PREDICTED: O-acyltransferase WSD1-like [Solanum lycopersicum]	molecular function: catalytic activity (GO:0003824);; cellular component: cell (GO:0005623);; cellular component: organelle (GO:0043226);; cellular component: cell part (GO:0044464);; biological process: metabolic process (GO:0008152);; biological process: single-organism process (GO:0044699)
PGSC0003DMG400001661	Aldo-keto reductase	4.91996	235	6.2974	930	3.98908	203	32.553	4289	30.2356	3465	42.1827	5475	2.45183e-15	3.53784	up	[R]	General function prediction only	Cellular Component: nucleus (GO:0005634);; Cellular Component: cytosol (GO:0005829);; Molecular Function: alcohol dehydrogenase (NADP+) activity (GO:0008106);; Biological Process: response to cold (GO:0009409);; Biological Process: response to water deprivation (GO:0009414);; Cellular Component: chloroplast (GO:0009507);; Biological Process: response to salt stress (GO:0009651);; Molecular Functi…	K00011|0|sot:102596820|K00011 aldehyde reductase [EC:1.1.1.21] | (RefSeq) NADP-dependent D-sorbitol-6-phosphate dehydrogenase-like	Pentose and glucuronate interconversions (ko00040);; Fructose and mannose metabolism (ko00051);; Galactose metabolism (ko00052);; Glycerolipid metabolism (ko00561)	[R]	General function prediction only	Aldo/keto reductase family	NADP-dependent D-sorbitol-6-phosphate dehydrogenase GN=S6PDH OS=Malus domestica (Apple) PE=2 SV=1	R	General function prediction only	PREDICTED: NADP-dependent D-sorbitol-6-phosphate dehydrogenase [Vitis vinifera]	cellular component: cell (GO:0005623);; cellular component: organelle (GO:0043226);; cellular component: cell part (GO:0044464);; molecular function: catalytic activity (GO:0003824);; biological process: metabolic process (GO:0008152);; biological process: single-organism process (GO:0044699);; biological process: response to stimulus (GO:0050896);; molecular function: binding (GO:0005488);; biol…
Solanum_tuberosum_newGene_3129	--	0	0	0.109829	4	0.092656	4	1.72735	57	1.06906	32	1.03527	32	3.97115e-07	4.13509	up	--	--	--	--	--	--	--	--	--	S	Function unknown	PREDICTED: uncharacterized protein LOC107062984 [Solanum tuberosum]	--
PGSC0003DMG400030427	Hsp20.1 protein	5.1726	123	2.72619	72	3.43786	82	27.1373	644	27.6539	581	30.5345	672	4.38693e-24	3.00525	up	[O]	Posttranslational modification, protein turnover, chaperones	Cellular Component: cytoplasm (GO:0005737);; Biological Process: protein folding (GO:0006457);; Biological Process: response to stress (GO:0006950);; Biological Process: response to high light intensity (GO:0009644);; Biological Process: response to salt stress (GO:0009651);; Biological Process: heat acclimation (GO:0010286);; Biological Process: response to endoplasmic reticulum stress (GO:00349…	K13993|7.57096e-98|sot:102605762|K13993 HSP20 family protein | (RefSeq) 17.7 kDa class I heat shock protein-like	Protein processing in endoplasmic reticulum (ko04141)	[O]	Posttranslational modification, protein turnover, chaperones	Hsp20/alpha crystallin family	17.7 kDa class I heat shock protein OS=Solanum peruvianum (Peruvian tomato) PE=2 SV=1	O	Posttranslational modification, protein turnover, chaperones	Hsp20.1 protein [Solanum peruvianum]	cellular component: cell (GO:0005623);; cellular component: cell part (GO:0044464);; biological process: cellular process (GO:0009987);; biological process: response to stimulus (GO:0050896);; biological process: cellular component organization or biogenesis (GO:0071840)
Solanum_tuberosum_newGene_9709	--	0.018127	4	0	0	0.070358	7	2.91163	175	3.09659	246	2.01819	126	8.70744e-10	5.85354	up	--	--	--	--	--	--	--	--	--	--	--	--	--
PGSC0003DMG400016714	1-aminocyclopropane-1-carboxylate oxidase	1.69849	63	0	0	1.27549	46	10.3144	439	3.38732	125	6.19005	240	0.00470613	3.03965	up	[R]	General function prediction only	Biological Process: MAPK cascade (GO:0000165);; Cellular Component: cytoplasm (GO:0005737);; Biological Process: protein targeting to membrane (GO:0006612);; Biological Process: defense response (GO:0006952);; Biological Process: detection of biotic stimulus (GO:0009595);; Biological Process: ethylene biosynthetic process (GO:0009693);; Biological Process: salicylic acid biosynthetic process (GO:…	K05933|0|sot:102584835|K05933 aminocyclopropanecarboxylate oxidase [EC:1.14.17.4] | (RefSeq) 1-aminocyclopropane-1-carboxylate oxidase-like	Cysteine and methionine metabolism (ko00270)	[QR]	Secondary metabolites biosynthesis, transport and catabolism;; General function prediction only	2OG-Fe(II) oxygenase superfamily;; non-haem dioxygenase in morphine synthesis N-terminal	1-aminocyclopropane-1-carboxylate oxidase GN=ACO OS=Actinidia deliciosa (Kiwi) PE=2 SV=1	Q	Secondary metabolites biosynthesis, transport and catabolism	1-aminocyclopropane-1-carboxylate oxidase [Solanum lycopersicum]	biological process: metabolic process (GO:0008152);; biological process: cellular process (GO:0009987);; biological process: signaling (GO:0023052);; biological process: single-organism process (GO:0044699);; biological process: response to stimulus (GO:0050896);; biological process: biological regulation (GO:0065007);; cellular component: cell (GO:0005623);; cellular component: cell part (GO:004…
PGSC0003DMG400005436	Sterol desaturase	0.97023	71	0	0	0.664538	49	9.84253	697	2.64972	167	6.79706	470	0.00176985	3.63255	up	[I]	Lipid transport and metabolism	Molecular Function: iron ion binding (GO:0005506);; Cellular Component: mitochondrion (GO:0005739);; Biological Process: lipid metabolic process (GO:0006629);; Biological Process: fatty acid biosynthetic process (GO:0006633);; Biological Process: response to water deprivation (GO:0009414);; Biological Process: wax biosynthetic process (GO:0010025);; Biological Process: cutin biosynthetic process …	K15404|0|sot:102599091|K15404 aldehyde decarbonylase [EC:4.1.99.5] | (RefSeq) protein ECERIFERUM 1-like	Cutin, suberine and wax biosynthesis (ko00073)	--	--	WAX2 C-terminal domain;; Fatty acid hydroxylase superfamily	Protein ECERIFERUM 1 GN=CER1 OS=Arabidopsis thaliana (Mouse-ear cress) PE=1 SV=1	I	Lipid transport and metabolism	PREDICTED: protein ECERIFERUM 1-like [Solanum lycopersicum]	molecular function: binding (GO:0005488);; cellular component: cell (GO:0005623);; cellular component: organelle (GO:0043226);; cellular component: cell part (GO:0044464);; biological process: metabolic process (GO:0008152);; biological process: single-organism process (GO:0044699);; biological process: cellular process (GO:0009987);; biological process: response to stimulus (GO:0050896);; cellul…
PGSC0003DMG400023366	Quinonprotein alcohol dehydrogenase	2.88317	121	3.86588	216	1.91618	112	0.215074	17	0.603004	20	0.178399	16	1.37229e-05	-2.82459	down	[S]	Function unknown	--	--	--	--	--	PQQ-like domain;; PQQ enzyme repeat;; PQQ-like domain;; Peptidase propeptide and YPEB domain	--	R	General function prediction only	unnamed protein product [Vitis vinifera]	--
PGSC0003DMG400005228	Glycerophosphodiester phosphodiesterase	2.42333	134	1.946	118	2.37591	131	23.4231	1135	22.2778	962	21.1012	961	2.00155e-36	3.22474	up	[C]	Energy production and conversion	Biological Process: glycerol metabolic process (GO:0006071);; Molecular Function: glycerophosphodiester phosphodiesterase activity (GO:0008889);; Cellular Component: cytoplasmic vesicle (GO:0016023);;	K18696|0|sly:101264545|K18696 glycerophosphodiester phosphodiesterase [EC:3.1.4.46] | (RefSeq) glycerophosphodiester phosphodiesterase GDPD3-like	Glycerophospholipid metabolism (ko00564)	[R]	General function prediction only	Glycerophosphoryl diester phosphodiesterase family	--	R	General function prediction only	PREDICTED: glycerophosphodiester phosphodiesterase GDE1-like [Solanum lycopersicum]	biological process: metabolic process (GO:0008152);; biological process: cellular process (GO:0009987);; biological process: single-organism process (GO:0044699);; molecular function: catalytic activity (GO:0003824)
PGSC0003DMG400009876	Conserved gene of unknown function	2.99003	102	1.31198	50	1.62939	56	0.166367	6	0	0	0	0	3.76729e-06	-5.03091	down	--	--	Cellular Component: mitochondrion (GO:0005739);;	--	--	--	--	--	--	--	--	PREDICTED: uncharacterized protein LOC101267600 [Solanum lycopersicum]	cellular component: cell (GO:0005623);; cellular component: organelle (GO:0043226);; cellular component: cell part (GO:0044464)
Solanum_tuberosum_newGene_10991	--	0.193441	9	0	0	0.15971	7	5.53866	232	1.02832	37	4.0169	154	0.00224949	4.87326	up	[E]	Amino acid transport and metabolism	Biological Process: defense response to insect (GO:0002213);; Molecular Function: aminopeptidase activity (GO:0004177);; Biological Process: proteolysis (GO:0006508);; Molecular Function: metalloexopeptidase activity (GO:0008235);; Cellular Component: chloroplast (GO:0009507);; Molecular Function: manganese ion binding (GO:0030145);;	K01255|0|sot:102595887|K01255 leucyl aminopeptidase [EC:3.4.11.1] | (RefSeq) LAP; leucine aminopeptidase, chloroplastic	Glutathione metabolism (ko00480)	[R]	General function prediction only	Cytosol aminopeptidase family, catalytic domain;; Cytosol aminopeptidase family, N-terminal domain	Leucine aminopeptidase, chloroplastic OS=Solanum tuberosum OX=4113 GN=LAP PE=2 SV=2	E	Amino acid transport and metabolism	PREDICTED: leucine aminopeptidase, chloroplastic [Solanum tuberosum]	biological process: response to stimulus (GO:0050896);; molecular function: catalytic activity (GO:0003824);; biological process: metabolic process (GO:0008152);; cellular component: cell (GO:0005623);; cellular component: organelle (GO:0043226);; cellular component: cell part (GO:0044464);; molecular function: binding (GO:0005488)
Solanum_tuberosum_newGene_6718	--	2.04103	46	0.743226	19	1.09655	25	11.023	244	5.59582	110	7.85019	161	1.20826e-06	2.71155	up	--	--	Molecular Function: transcription corepressor activity (GO:0003714);; Cellular Component: nucleus (GO:0005634);; Biological Process: response to wounding (GO:0009611);; Biological Process: regulation of defense response (GO:0031347);; Biological Process: negative regulation of nucleic acid-templated transcription (GO:1903507);; Biological Process: regulation of jasmonic acid mediated signaling pa…	--	--	--	--	tify domain;; Divergent CCT motif	Protein TIFY 5A OS=Arabidopsis thaliana OX=3702 GN=TIFY5A PE=1 SV=1	S	Function unknown	PREDICTED: protein TIFY 5A-like [Solanum tuberosum]	molecular function: transcription factor activity, protein binding (GO:0000988);; biological process: biological regulation (GO:0065007);; cellular component: cell (GO:0005623);; cellular component: organelle (GO:0043226);; cellular component: cell part (GO:0044464);; biological process: response to stimulus (GO:0050896)
PGSC0003DMG400024362	Anthranilate N-benzoyltransferase protein	0.160861	9	0	0	0.040399	3	5.03826	254	1.47698	66	2.31222	108	0.000419628	5.31025	up	--	--	Biological Process: metabolic process (GO:0008152);; Molecular Function: O-acyltransferase activity (GO:0008374);; Biological Process: cellular process (GO:0009987);; Biological Process: cellular component organization (GO:0016043);; Molecular Function: N-acyltransferase activity (GO:0016410);; Molecular Function: transferase activity (GO:0016740);; Biological Process: cellular nitrogen compound …	--	--	--	--	Transferase family	Omega-hydroxypalmitate O-feruloyl transferase GN=MEE6.11 OS=Arabidopsis thaliana (Mouse-ear cress) PE=1 SV=1	S	Function unknown	PREDICTED: omega-hydroxypalmitate O-feruloyl transferase-like [Solanum lycopersicum]	biological process: metabolic process (GO:0008152);; molecular function: catalytic activity (GO:0003824);; biological process: cellular process (GO:0009987);; biological process: cellular component organization or biogenesis (GO:0071840);; biological process: single-organism process (GO:0044699)
PGSC0003DMG400027225	Conserved gene of unknown function	35.5772	551	17.2139	296	21.1491	326	97.2471	1505	131.446	1798	142.002	2036	3.90987e-11	2.42812	up	--	--	--	--	--	--	--	--	--	--	--	PREDICTED: uncharacterized protein LOC100854383 [Vitis vinifera]	--
PGSC0003DMG400022092	Gene of unknown function	0	0	0.012067	2	0.077859	8	5.95473	623	7.56408	616	8.48052	609	7.20424e-70	7.74313	up	--	--	--	--	--	--	--	--	--	--	--	--	--
PGSC0003DMG400016102	Non-specific lipid-transfer protein	0.572302	13	0	0	0.04791	2	6.88772	147	1.44887	28	5.5884	111	0.00198792	4.41743	up	--	--	Biological Process: transport (GO:0006810);; Biological Process: response to stress (GO:0006950);;	--	--	--	--	Protease inhibitor/seed storage/LTP family;; Probable lipid transfer	Non-specific lipid-transfer protein (Precursor) OS=Spinacia oleracea (Spinach) PE=1 SV=2	--	--	PREDICTED: non-specific lipid-transfer protein 2-like [Solanum lycopersicum]	biological process: localization (GO:0051179);; biological process: response to stimulus (GO:0050896)
PGSC0003DMG400002068	Gibberellin 2-oxidase 1	0.200372	10	0.071938	4	0.21161	11	3.42736	113	1.06354	37	1.8184	57	0.00148919	3.22042	up	[R]	General function prediction only	Cellular Component: cytoplasm (GO:0005737);; Biological Process: aging (GO:0007568);; Biological Process: response to salt stress (GO:0009651);; Biological Process: gibberellin metabolic process (GO:0009685);; Biological Process: response to hormone (GO:0009725);; Biological Process: post-embryonic development (GO:0009791);; Biological Process: fruit development (GO:0010154);; Molecular Function:…	K04125|0|sot:102582860|K04125 gibberellin 2-oxidase [EC:1.14.11.13] | (RefSeq) gibberellin 2-beta-dioxygenase 8	Diterpenoid biosynthesis (ko00904)	[QR]	Secondary metabolites biosynthesis, transport and catabolism;; General function prediction only	2OG-Fe(II) oxygenase superfamily;; non-haem dioxygenase in morphine synthesis N-terminal	Gibberellin 2-beta-dioxygenase 8 GN=GA2OX8 OS=Arabidopsis thaliana (Mouse-ear cress) PE=1 SV=2	Q	Secondary metabolites biosynthesis, transport and catabolism	PREDICTED: gibberellin 2-beta-dioxygenase 8-like [Solanum lycopersicum]	cellular component: cell (GO:0005623);; cellular component: cell part (GO:0044464);; biological process: developmental process (GO:0032502);; biological process: single-organism process (GO:0044699);; biological process: response to stimulus (GO:0050896);; biological process: metabolic process (GO:0008152);; biological process: cellular process (GO:0009987);; biological process: multicellular org…
PGSC0003DMG400010092	Cinnamoyl-CoA reductase	0.158079	9	0.198934	12	0.402034	21	1.90191	91	2.36151	98	2.56702	114	9.14815e-08	3.08432	up	[MG]	Cell wall/membrane/envelope biogenesis;; Carbohydrate transport and metabolism	Molecular Function: nucleic acid binding (GO:0003676);; Molecular Function: 3-beta-hydroxy-delta5-steroid dehydrogenase activity (GO:0003854);; Molecular Function: protein binding (GO:0005515);; Cellular Component: endoplasmic reticulum (GO:0005783);; Biological Process: RNA processing (GO:0006396);; Biological Process: steroid biosynthetic process (GO:0006694);; Biological Process: transport (GO…	--	--	[V]	Defense mechanisms	3-beta hydroxysteroid dehydrogenase/isomerase family;; NAD dependent epimerase/dehydratase family;; NADH(P)-binding;; NmrA-like family	Tetraketide alpha-pyrone reductase 1 GN=F23E12.20 OS=Arabidopsis thaliana (Mouse-ear cress) PE=2 SV=1	V	Defense mechanisms	PREDICTED: tetraketide alpha-pyrone reductase 1-like isoform 1 [Solanum lycopersicum]	molecular function: binding (GO:0005488);; molecular function: catalytic activity (GO:0003824);; biological process: metabolic process (GO:0008152);; biological process: single-organism process (GO:0044699);; cellular component: cell (GO:0005623);; cellular component: organelle (GO:0043226);; cellular component: cell part (GO:0044464);; biological process: cellular process (GO:0009987);; biologic…
PGSC0003DMG400011256	Homeobox-leucine zipper protein MERISTEM L1	0.349867	34	0.131516	15	0.105428	11	2.83279	271	1.15707	72	1.89983	170	0.00245329	3.27999	up	[K]	Transcription	Biological Process: double-strand break repair via homologous recombination (GO:0000724);; Molecular Function: transcription factor activity, sequence-specific DNA binding (GO:0003700);; Molecular Function: protein binding (GO:0005515);; Cellular Component: nucleus (GO:0005634);; Cellular Component: cytoplasm (GO:0005737);; Biological Process: regulation of transcription, DNA-templated (GO:000635…	K09338|0|sot:102595563|K09338 homeobox-leucine zipper protein | (RefSeq) homeobox-leucine zipper protein MERISTEM L1	--	--	--	START domain;; Homeobox domain	Homeobox-leucine zipper protein PROTODERMAL FACTOR 2 GN=PDF2 OS=Arabidopsis thaliana (Mouse-ear cress) PE=2 SV=1	K	Transcription	PREDICTED: homeobox-leucine zipper protein MERISTEM L1-like [Solanum lycopersicum]	biological process: metabolic process (GO:0008152);; biological process: cellular process (GO:0009987);; biological process: response to stimulus (GO:0050896);; molecular function: nucleic acid binding transcription factor activity (GO:0001071);; biological process: biological regulation (GO:0065007);; molecular function: binding (GO:0005488);; cellular component: cell (GO:0005623);; cellular com…
PGSC0003DMG400018539	Oligopeptide transporter OPT family	0.092664	7	0.072834	6	0.064606	5	0.881273	44	0.389496	26	0.516615	37	0.000387234	2.78911	up	--	--	Cellular Component: cytoplasm (GO:0005737);; Cellular Component: plasma membrane (GO:0005886);; Biological Process: protein targeting to membrane (GO:0006612);; Biological Process: oligopeptide transport (GO:0006857);; Biological Process: nucleotide transport (GO:0006862);; Biological Process: ER to Golgi vesicle-mediated transport (GO:0006888);; Biological Process: membrane fusion (GO:0006944);;…	--	--	[T]	Signal transduction mechanisms	OPT oligopeptide transporter protein	Oligopeptide transporter 7 GN=OPT7 OS=Arabidopsis thaliana (Mouse-ear cress) PE=2 SV=1	P	Inorganic ion transport and metabolism	PREDICTED: oligopeptide transporter 6-like [Solanum lycopersicum]	cellular component: cell (GO:0005623);; cellular component: cell part (GO:0044464);; cellular component: membrane (GO:0016020);; biological process: localization (GO:0051179);; biological process: single-organism process (GO:0044699);; biological process: biological regulation (GO:0065007);; molecular function: transporter activity (GO:0005215);; biological process: reproduction (GO:0000003);; bi…
PGSC0003DMG400009654	TNP2-like transposon protein	0	0	0	0	0	0	2.27788	56	2.34351	52	1.56559	28	7.78891e-13	Inf	up	--	--	Cellular Component: mitochondrion (GO:0005739);;	--	--	--	--	--	--	S	Function unknown	hypothetical protein LOC_Os11g03340 [Oryza sativa Japonica Group]	cellular component: cell (GO:0005623);; cellular component: organelle (GO:0043226);; cellular component: cell part (GO:0044464)
PGSC0003DMG400024849	Alcohol dehydrogenase 1	0.318812	16	0	0	0.286782	17	1.34015	75	0.616037	33	0.994785	55	0.000246765	2.47751	up	[C]	Energy production and conversion	Molecular Function: nucleotide binding (GO:0000166);; Biological Process: response to hypoxia (GO:0001666);; Molecular Function: alcohol dehydrogenase (NAD) activity (GO:0004022);; Cellular Component: cytosol (GO:0005829);; Cellular Component: plasma membrane (GO:0005886);; Molecular Function: zinc ion binding (GO:0008270);; Biological Process: response to salt stress (GO:0009651);; Biological Pr…	K18857|0|sot:102597889|K18857 alcohol dehydrogenase class-P [EC:1.1.1.1] | (RefSeq) alcohol dehydrogenase 1	Glycolysis / Gluconeogenesis (ko00010);; Fatty acid degradation (ko00071);; Tyrosine metabolism (ko00350);; alpha-Linolenic acid metabolism (ko00592)	[Q]	Secondary metabolites biosynthesis, transport and catabolism	Alcohol dehydrogenase GroES-like domain;; Zinc-binding dehydrogenase	Alcohol dehydrogenase 1 GN=ADH1 OS=Petunia hybrida (Petunia) PE=3 SV=1	Q	Secondary metabolites biosynthesis, transport and catabolism	PREDICTED: alcohol dehydrogenase 1-like [Solanum lycopersicum]	molecular function: binding (GO:0005488);; biological process: response to stimulus (GO:0050896);; molecular function: catalytic activity (GO:0003824);; biological process: metabolic process (GO:0008152);; biological process: single-organism process (GO:0044699);; cellular component: cell (GO:0005623);; cellular component: cell part (GO:0044464);; cellular component: membrane (GO:0016020);; biolo…
PGSC0003DMG402002698	Fatty acyl-CoA reductase 2	0	0	0	0	0	0	4.05879	233	1.20433	63	4.072	192	6.49877e-10	Inf	up	[Q]	Secondary metabolites biosynthesis, transport and catabolism	Cellular Component: cytosol (GO:0005829);; Cellular Component: plasma membrane (GO:0005886);; Biological Process: cellular protein modification process (GO:0006464);; Biological Process: response to stress (GO:0006950);; Molecular Function: methionine synthase activity (GO:0008705);; Biological Process: biosynthetic process (GO:0009058);; Cellular Component: plasmodesma (GO:0009506);; Biological …	K13356|0|sot:102592738|K13356 alcohol-forming fatty acyl-CoA reductase [EC:1.2.1.84] | (RefSeq) fatty acyl-CoA reductase 2-like	Cutin, suberine and wax biosynthesis (ko00073);; Peroxisome (ko04146)	[I]	Lipid transport and metabolism	Male sterility protein;; Male sterility protein	Fatty acyl-CoA reductase 2 OS=Arabidopsis thaliana (Mouse-ear cress) PE=2 SV=2	I	Lipid transport and metabolism	PREDICTED: fatty acyl-CoA reductase 2-like [Solanum lycopersicum]	cellular component: cell (GO:0005623);; cellular component: cell part (GO:0044464);; cellular component: membrane (GO:0016020);; biological process: metabolic process (GO:0008152);; biological process: cellular process (GO:0009987);; biological process: response to stimulus (GO:0050896);; molecular function: catalytic activity (GO:0003824);; cellular component: cell junction (GO:0030054);; cellul…
PGSC0003DMG400006915	Conserved gene of unknown function	3.01993	82	3.18198	96	3.67203	99	0.670265	19	0.211937	6	0.243666	7	4.61939e-06	-2.93336	down	--	--	Molecular Function: protein binding (GO:0005515);; Biological Process: jasmonic acid metabolic process (GO:0009694);; Biological Process: response to jasmonic acid (GO:0009753);;	--	--	--	--	--	--	S	Function unknown	PREDICTED: uncharacterized protein LOC101257136 [Solanum lycopersicum]	molecular function: binding (GO:0005488);; biological process: metabolic process (GO:0008152);; biological process: cellular process (GO:0009987);; biological process: single-organism process (GO:0044699);; biological process: response to stimulus (GO:0050896)
PGSC0003DMG400018060	Zinc finger protein	7.44072	595	10.3176	922	8.10398	633	77.9023	6978	90.0734	7128	86.7474	7189	1.41078e-65	3.55537	up	--	--	Biological Process: respiratory burst involved in defense response (GO:0002679);; Molecular Function: ubiquitin-protein transferase activity (GO:0004842);; Molecular Function: protein binding (GO:0005515);; Cellular Component: nucleus (GO:0005634);; Cellular Component: cytosol (GO:0005829);; Cellular Component: plasma membrane (GO:0005886);; Biological Process: amino acid transport (GO:0006865);;…	K11982|0|sot:102578980|K11982 E3 ubiquitin-protein ligase RNF115/126 [EC:2.3.2.27] | (RefSeq) E3 ubiquitin-protein ligase RING1	--	[O]	Posttranslational modification, protein turnover, chaperones	Ring finger domain;; zinc-finger;; Zinc finger, C3HC4 type (RING finger);; Zinc finger, C3HC4 type (RING finger)	E3 ubiquitin-protein ligase RING1 GN=RING1 OS=Gossypium hirsutum (Upland cotton) PE=2 SV=1	O	Posttranslational modification, protein turnover, chaperones	hypothetical protein PRUPE_ppa007335mg [Prunus persica]	biological process: immune system process (GO:0002376);; biological process: metabolic process (GO:0008152);; biological process: single-organism process (GO:0044699);; molecular function: catalytic activity (GO:0003824);; molecular function: binding (GO:0005488);; cellular component: cell (GO:0005623);; cellular component: organelle (GO:0043226);; cellular component: cell part (GO:0044464);; cel…
PGSC0003DMG400031236	Non-specific lipid-transfer protein	7.40812	123	1.41947	21	3.7457	48	22.3886	401	12.0896	173	18.5052	312	0.000109151	2.39583	up	--	--	Biological Process: lipid transport (GO:0006869);; Biological Process: response to stress (GO:0006950);; Biological Process: defense response (GO:0006952);; Molecular Function: lipid binding (GO:0008289);; Biological Process: response to biotic stimulus (GO:0009607);; Cellular Component: cytoplasmic vesicle (GO:0016023);; Biological Process: multi-organism process (GO:0051704);;	--	--	--	--	Protease inhibitor/seed storage/LTP family;; Probable lipid transfer	Non-specific lipid-transfer protein 2 (Precursor) OS=Nicotiana tabacum (Common tobacco) PE=3 SV=1	T	Signal transduction mechanisms	PREDICTED: non-specific lipid-transfer protein 2-like [Solanum lycopersicum]	biological process: single-organism process (GO:0044699);; biological process: localization (GO:0051179);; biological process: response to stimulus (GO:0050896);; molecular function: binding (GO:0005488);; biological process: multi-organism process (GO:0051704)
PGSC0003DMG400042886	ATP binding protein	0.994094	50	1.69948	94	1.2122	61	0.060681	4	0.211577	10	0.252887	12	6.49685e-05	-2.69706	down	--	--	Molecular Function: binding (GO:0005488);; Cellular Component: endosome (GO:0005768);; Cellular Component: Golgi apparatus (GO:0005794);; Cellular Component: trans-Golgi network (GO:0005802);; Cellular Component: plasma membrane (GO:0005886);; Biological Process: oligopeptide transport (GO:0006857);; Biological Process: response to stress (GO:0006950);; Molecular Function: transferase activity (G…	--	--	--	--	D-mannose binding lectin;; S-locus glycoprotein family;; PAN-like domain	PAN domain-containing protein At5g03700 (Precursor) GN=At5g03700 OS=Arabidopsis thaliana (Mouse-ear cress) PE=1 SV=1	R	General function prediction only	PREDICTED: PAN domain-containing protein At5g03700-like [Solanum lycopersicum]	molecular function: binding (GO:0005488);; cellular component: cell (GO:0005623);; cellular component: organelle (GO:0043226);; cellular component: cell part (GO:0044464);; cellular component: organelle part (GO:0044422);; cellular component: membrane (GO:0016020);; biological process: localization (GO:0051179);; biological process: response to stimulus (GO:0050896);; molecular function: catalyti…
PGSC0003DMG400009514	Kunitz-type protease inhibitor	0.157952	5	0	0	0.056199	2	9.8607	253	1.48716	34	6.74795	160	0.000842964	6.14579	up	--	--	Molecular Function: endopeptidase inhibitor activity (GO:0004866);; Cellular Component: vacuole (GO:0005773);; Molecular Function: peptidase inhibitor activity (GO:0030414);;	--	--	--	--	Trypsin and protease inhibitor	Aspartic protease inhibitor 1 (Precursor) OS=Solanum tuberosum (Potato) PE=1 SV=2	--	--	PREDICTED: serine protease inhibitor 1-like [Solanum lycopersicum]	molecular function: molecular function regulator (GO:0098772);; biological process: biological regulation (GO:0065007);; cellular component: cell (GO:0005623);; cellular component: organelle (GO:0043226);; cellular component: cell part (GO:0044464)
PGSC0003DMG400000546	UP-9A	39.2798	1081	52.2928	1596	43.4782	1191	7.72422	213	8.97181	219	7.0328	180	8.84619e-18	-2.41528	down	--	--	--	--	--	--	--	--	--	S	Function unknown	PREDICTED: uncharacterized protein LOC101243684 [Solanum lycopersicum]	--
PGSC0003DMG400010462	Bcl-2-associated athanogene	4.30643	144	2.75181	102	3.26393	109	27.1672	904	32.9474	969	31.0742	958	3.9455e-35	3.23357	up	--	--	Molecular Function: calmodulin binding (GO:0005516);; Biological Process: response to heat (GO:0009408);; Biological Process: response to cold (GO:0009409);; Cellular Component: plasmodesma (GO:0009506);; Biological Process: response to high light intensity (GO:0009644);; Biological Process: vegetative to reproductive phase transition of meristem (GO:0010228);; Biological Process: induction of pr…	--	--	--	--	BAG domain;; IQ calmodulin-binding motif	BAG family molecular chaperone regulator 5, mitochondrial (Precursor) GN=BAG5 OS=Arabidopsis thaliana (Mouse-ear cress) PE=1 SV=1	S	Function unknown	PREDICTED: BAG family molecular chaperone regulator 5, mitochondrial-like [Solanum lycopersicum]	molecular function: binding (GO:0005488);; biological process: response to stimulus (GO:0050896);; cellular component: cell junction (GO:0030054);; biological process: reproduction (GO:0000003);; biological process: reproductive process (GO:0022414);; biological process: developmental process (GO:0032502);; biological process: biological regulation (GO:0065007);; biological process: multi-organis…
PGSC0003DMG400012526	DREB1	7.49182	245	11.5131	418	13.6573	445	66.574	2177	70.2396	2030	57.2313	1734	4.67558e-34	2.65737	up	--	--	Molecular Function: transcription factor activity, sequence-specific DNA binding (GO:0003700);; Cellular Component: nucleus (GO:0005634);; Biological Process: regulation of transcription, DNA-templated (GO:0006355);; Biological Process: response to heat (GO:0009408);; Biological Process: response to water deprivation (GO:0009414);; Cellular Component: plastid (GO:0009536);; Biological Process: re…	--	--	--	--	AP2 domain	Dehydration-responsive element-binding protein 1F GN=T12C24.14 OS=Arabidopsis thaliana (Mouse-ear cress) PE=2 SV=1	--	--	PREDICTED: dehydration-responsive element-binding protein 1F-like [Solanum lycopersicum]	molecular function: nucleic acid binding transcription factor activity (GO:0001071);; biological process: biological regulation (GO:0065007);; cellular component: cell (GO:0005623);; cellular component: organelle (GO:0043226);; cellular component: cell part (GO:0044464);; biological process: response to stimulus (GO:0050896);; biological process: cellular process (GO:0009987);; biological process…
PGSC0003DMG400013198	Systemin receptor SR160	0.112329	5	0.16402	19	0	0	0.860341	65	0.735516	38	0.575917	45	6.55872e-05	2.88293	up	[S]	Function unknown	Biological Process: microtubule cytoskeleton organization (GO:0000226);; Biological Process: cell fate specification (GO:0001708);; Molecular Function: protein kinase activity (GO:0004672);; Molecular Function: protein serine/threonine kinase activity (GO:0004674);; Molecular Function: protein binding (GO:0005515);; Molecular Function: ATP binding (GO:0005524);; Cellular Component: cytoplasm (GO:…	--	--	--	--	Protein kinase domain;; Protein tyrosine kinase;; Leucine Rich repeats (2 copies);; Leucine rich repeat;; Leucine Rich Repeat;; Leucine Rich repeat;; Leucine rich repeat;; Leucine rich repeat N-terminal domain	Probably inactive leucine-rich repeat receptor-like protein kinase IMK2 (Precursor) GN=IMK2 OS=Arabidopsis thaliana (Mouse-ear cress) PE=1 SV=1	T	Signal transduction mechanisms	PREDICTED: probably inactive leucine-rich repeat receptor-like protein kinase IMK2-like [Solanum lycopersicum]	biological process: cellular process (GO:0009987);; biological process: cellular component organization or biogenesis (GO:0071840);; biological process: developmental process (GO:0032502);; biological process: single-organism process (GO:0044699);; molecular function: catalytic activity (GO:0003824);; biological process: metabolic process (GO:0008152);; molecular function: binding (GO:0005488);; …
PGSC0003DMG400036174	Galacturonic acid reductase	0	0	0	0	0	0	1.6314	30	3.12765	52	1.47344	26	3.88418e-07	Inf	up	[R]	General function prediction only	Cellular Component: cytosol (GO:0005829);; Biological Process: response to stress (GO:0006950);; Molecular Function: alcohol dehydrogenase (NADP+) activity (GO:0008106);; Biological Process: response to abiotic stimulus (GO:0009628);; Biological Process: response to inorganic substance (GO:0010035);; Molecular Function: oxidoreductase activity (GO:0016491);; Biological Process: cellular nitrogen …	K19642|2.89183e-107|sly:101256763|K19642 D-galacturonate reductase [EC:1.1.1.365] | (RefSeq) D-galacturonate reductase-like	Ascorbate and aldarate metabolism (ko00053)	[R]	General function prediction only	Aldo/keto reductase family	NAD(P)H-dependent 6&apos;-deoxychalcone synthase OS=Glycine max (Soybean) PE=1 SV=1	R	General function prediction only	PREDICTED: non-functional NADPH-dependent codeinone reductase 2-like [Solanum lycopersicum]	cellular component: cell (GO:0005623);; cellular component: cell part (GO:0044464);; biological process: response to stimulus (GO:0050896);; molecular function: catalytic activity (GO:0003824);; biological process: metabolic process (GO:0008152);; biological process: single-organism process (GO:0044699);; biological process: cellular process (GO:0009987);; cellular component: organelle (GO:004322…
PGSC0003DMG400027428	Sigma factor sigb regulation protein rsbq	0.307091	12	0	0	0.156508	7	10.7021	418	2.95194	102	9.04381	328	7.15258e-06	5.64344	up	[R]	General function prediction only	Cellular Component: plastid (GO:0009536);; Biological Process: response to wounding (GO:0009611);; Biological Process: de-etiolation (GO:0009704);; Biological Process: response to sucrose (GO:0009744);; Biological Process: coumarin biosynthetic process (GO:0009805);; Biological Process: flavonoid biosynthetic process (GO:0009813);; Biological Process: secondary shoot formation (GO:0010223);; Biol…	--	--	--	--	Alpha/beta hydrolase family;; alpha/beta hydrolase fold;; Alpha/beta hydrolase family	Probable strigolactone esterase DAD2 GN=DAD2 OS=Petunia hybrida (Petunia) PE=1 SV=1	R	General function prediction only	PREDICTED: sigma factor sigB regulation protein rsbQ isoform 2 [Vitis vinifera]	cellular component: cell (GO:0005623);; cellular component: organelle (GO:0043226);; cellular component: cell part (GO:0044464);; biological process: response to stimulus (GO:0050896);; biological process: metabolic process (GO:0008152);; biological process: cellular process (GO:0009987);; biological process: single-organism process (GO:0044699);; biological process: multicellular organismal proc…
PGSC0003DMG400001823	Ent-kaurenoic acid oxidase	0.81724	50	0.808967	39	0.537695	34	4.06722	237	4.22038	224	3.17688	174	5.71838e-09	2.60185	up	[Q]	Secondary metabolites biosynthesis, transport and catabolism	Molecular Function: iron ion binding (GO:0005506);; Cellular Component: endoplasmic reticulum (GO:0005783);; Biological Process: steroid biosynthetic process (GO:0006694);; Biological Process: response to stress (GO:0006950);; Molecular Function: electron carrier activity (GO:0009055);; Biological Process: response to UV (GO:0009411);; Biological Process: response to red or far red light (GO:0009…	K04123|0|sot:102603753|K04123 ent-kaurenoic acid hydroxylase [EC:1.14.13.79] | (RefSeq) ent-kaurenoic acid oxidase 2-like	Diterpenoid biosynthesis (ko00904)	[QI]	Secondary metabolites biosynthesis, transport and catabolism;; Lipid transport and metabolism	Cytochrome P450	Ent-kaurenoic acid oxidase 2 GN=T32F6.4 OS=Arabidopsis thaliana (Mouse-ear cress) PE=2 SV=2	Q	Secondary metabolites biosynthesis, transport and catabolism	PREDICTED: ent-kaurenoic acid oxidase 2-like [Solanum lycopersicum]	molecular function: binding (GO:0005488);; cellular component: cell (GO:0005623);; cellular component: organelle (GO:0043226);; cellular component: cell part (GO:0044464);; biological process: metabolic process (GO:0008152);; biological process: single-organism process (GO:0044699);; biological process: response to stimulus (GO:0050896);; molecular function: electron carrier activity (GO:0009055)…
PGSC0003DMG400024765	Epoxide hydrolase	0.216636	9	0	0	0.071814	3	4.38458	168	1.29952	45	3.85041	137	1.92246e-05	5.03615	up	[R]	General function prediction only	Molecular Function: epoxide hydrolase activity (GO:0004301);; Molecular Function: non-membrane spanning protein tyrosine kinase activity (GO:0004715);; Biological Process: metabolic process (GO:0008152);; Biological Process: response to light stimulus (GO:0009416);; Molecular Function: cis-stilbene-oxide hydrolase activity (GO:0033961);;	--	--	[I]	Lipid transport and metabolism	Alpha/beta hydrolase family;; alpha/beta hydrolase fold;; Alpha/beta hydrolase family;; Putative lysophospholipase	Probable esterase KAI2 GN=F6G17.120 OS=Arabidopsis thaliana (Mouse-ear cress) PE=1 SV=1	I	Lipid transport and metabolism	PREDICTED: bifunctional epoxide hydrolase 2-like [Solanum lycopersicum]	molecular function: catalytic activity (GO:0003824);; biological process: metabolic process (GO:0008152);; biological process: cellular process (GO:0009987);; biological process: response to stimulus (GO:0050896)
PGSC0003DMG402005881	Ferredoxin-3, chloroplast	8.81847	345	9.19353	400	9.20654	354	40.9251	1604	58.9032	2049	51.5212	1880	1.81788e-13	2.58296	up	[C]	Energy production and conversion	Molecular Function: protein binding (GO:0005515);; Biological Process: pentose-phosphate shunt (GO:0006098);; Biological Process: ferredoxin metabolic process (GO:0006124);; Molecular Function: electron carrier activity (GO:0009055);; Cellular Component: chloroplast stroma (GO:0009570);; Biological Process: response to blue light (GO:0009637);; Biological Process: response to high light intensity…	K02639|1.04909e-106|sot:102599873|K02639 ferredoxin | (RefSeq) ferredoxin, root R-B2-like	Photosynthesis (ko00195)	--	--	2Fe-2S iron-sulfur cluster binding domain	Ferredoxin-3, chloroplastic (Precursor) GN=FDX3 OS=Zea mays (Maize) PE=2 SV=1	R	General function prediction only	PREDICTED: ferredoxin-3, chloroplastic-like [Solanum lycopersicum]	molecular function: binding (GO:0005488);; biological process: metabolic process (GO:0008152);; biological process: cellular process (GO:0009987);; biological process: single-organism process (GO:0044699);; molecular function: electron carrier activity (GO:0009055);; cellular component: cell (GO:0005623);; cellular component: organelle (GO:0043226);; cellular component: organelle part (GO:0044422…
PGSC0003DMG400023388	Pleiotropic drug resistance protein 2	0.089233	15	0.019603	4	0.022688	4	1.2755	208	0.210106	31	0.902586	136	0.00936634	4.19523	up	[V]	Defense mechanisms	Molecular Function: ATP binding (GO:0005524);; Cellular Component: mitochondrion (GO:0005739);; Cellular Component: vacuolar membrane (GO:0005774);; Cellular Component: cytosol (GO:0005829);; Cellular Component: plasma membrane (GO:0005886);; Biological Process: obsolete ATP catabolic process (GO:0006200);; Biological Process: protein targeting to membrane (GO:0006612);; Biological Process: drug …	--	--	[Q]	Secondary metabolites biosynthesis, transport and catabolism	ABC-2 type transporter;; ABC transporter;; Plant PDR ABC transporter associated;; ABC-transporter extracellular N-terminal;; AAA domain;; AAA domain;; P-loop containing region of AAA domain;; AAA domain;; ATPase family associated with various cellular activities (AAA);; Protein of unknown function, DUF258;; NACHT domain	Pleiotropic drug resistance protein 2 GN=PDR2 OS=Nicotiana plumbaginifolia (Leadwort-leaved tobacco) PE=2 SV=1	Q	Secondary metabolites biosynthesis, transport and catabolism	PREDICTED: ABC transporter G family member 34-like [Solanum lycopersicum]	molecular function: binding (GO:0005488);; cellular component: cell (GO:0005623);; cellular component: organelle (GO:0043226);; cellular component: cell part (GO:0044464);; cellular component: membrane (GO:0016020);; cellular component: organelle part (GO:0044422);; biological process: localization (GO:0051179);; biological process: single-organism process (GO:0044699);; biological process: respo…
Solanum_tuberosum_newGene_11706	--	0.37573	17	0.391307	19	0.320886	14	1.95956	84	2.13147	81	2.63808	105	6.3809e-06	2.67603	up	--	--	Cellular Component: histone acetyltransferase complex (GO:0000123);;	--	--	--	--	Potential DNA-binding domain	--	S	Function unknown	PREDICTED: uncharacterized protein LOC102604518 [Solanum tuberosum]	cellular component: cell (GO:0005623);; cellular component: membrane-enclosed lumen (GO:0031974);; cellular component: macromolecular complex (GO:0032991);; cellular component: organelle (GO:0043226);; cellular component: organelle part (GO:0044422);; cellular component: cell part (GO:0044464)
PGSC0003DMG400003095	Leucoanthocyanidin dioxygenase	0.257349	12	0	0	0	0	2.90366	126	1.23582	48	2.90806	117	1.20503e-07	4.78865	up	[R]	General function prediction only	Cellular Component: cytoplasm (GO:0005737);; Biological Process: vacuole organization (GO:0007033);; Biological Process: response to wounding (GO:0009611);; Biological Process: response to abiotic stimulus (GO:0009628);; Biological Process: response to abscisic acid (GO:0009737);; Biological Process: response to jasmonic acid (GO:0009753);; Biological Process: embryo development ending in seed do…	--	--	[QR]	Secondary metabolites biosynthesis, transport and catabolism;; General function prediction only	2OG-Fe(II) oxygenase superfamily;; non-haem dioxygenase in morphine synthesis N-terminal	Protein SRG1 GN=SRG1 OS=Arabidopsis thaliana (Mouse-ear cress) PE=2 SV=1	Q	Secondary metabolites biosynthesis, transport and catabolism	PREDICTED: protein SRG1-like [Solanum lycopersicum]	cellular component: cell (GO:0005623);; cellular component: cell part (GO:0044464);; biological process: cellular process (GO:0009987);; biological process: cellular component organization or biogenesis (GO:0071840);; biological process: response to stimulus (GO:0050896);; biological process: reproduction (GO:0000003);; biological process: reproductive process (GO:0022414);; biological process: m…
PGSC0003DMG400011628	Chloroplast small heat shock protein class I	21.8617	649	13.5509	446	3.89704	116	60.5208	1795	69.9296	1833	64.8145	1781	1.75929e-20	2.40744	up	[O]	Posttranslational modification, protein turnover, chaperones	Cellular Component: nucleus (GO:0005634);; Cellular Component: cytoplasm (GO:0005737);; Biological Process: protein folding (GO:0006457);; Biological Process: response to stress (GO:0006950);; Biological Process: response to high light intensity (GO:0009644);; Biological Process: heat acclimation (GO:0010286);; Biological Process: response to hydrogen peroxide (GO:0042542);; Biological Process: r…	K13993|1.75826e-87|sot:102589396|K13993 HSP20 family protein | (RefSeq) 17.4 kDa class I heat shock protein-like	Protein processing in endoplasmic reticulum (ko04141)	[O]	Posttranslational modification, protein turnover, chaperones	Hsp20/alpha crystallin family	17.4 kDa class I heat shock protein GN=HSP17.4A OS=Arabidopsis thaliana (Mouse-ear cress) PE=2 SV=2	O	Posttranslational modification, protein turnover, chaperones	PREDICTED: 18.2 kDa class I heat shock protein-like [Solanum lycopersicum]	cellular component: cell (GO:0005623);; cellular component: organelle (GO:0043226);; cellular component: cell part (GO:0044464);; biological process: cellular process (GO:0009987);; biological process: response to stimulus (GO:0050896)
PGSC0003DMG400009852	Gene of unknown function	0	0	0	0	0	0	1.15357	78	0.969103	58	1.07148	67	1.31927e-16	Inf	up	--	--	--	--	--	--	--	--	--	--	--	--	--
PGSC0003DMG400012837	Non-specific lipid-transfer protein	0.468835	11	0	0	0	0	4.80549	88	1.88651	29	5.34179	90	6.36547e-05	4.42149	up	--	--	Biological Process: lipid transport (GO:0006869);; Biological Process: response to stress (GO:0006950);; Biological Process: defense response (GO:0006952);; Molecular Function: lipid binding (GO:0008289);; Biological Process: response to biotic stimulus (GO:0009607);; Biological Process: multi-organism process (GO:0051704);;	--	--	--	--	Protease inhibitor/seed storage/LTP family;; Probable lipid transfer	Non-specific lipid-transfer protein 2 (Precursor) GN=LE16 OS=Solanum lycopersicum (Tomato) PE=2 SV=1	T	Signal transduction mechanisms	putative non-specific lipid transfer protein StnsLTP [Solanum tuberosum]	biological process: single-organism process (GO:0044699);; biological process: localization (GO:0051179);; biological process: response to stimulus (GO:0050896);; molecular function: binding (GO:0005488);; biological process: multi-organism process (GO:0051704)
Solanum_tuberosum_newGene_2913	--	5.90361	233	4.61093	220	6.58642	267	36.7744	1360	27.616	930	30.6213	1081	1.53891e-24	2.44445	up	--	--	--	--	--	[E]	Amino acid transport and metabolism	Serine hydrolase (FSH1)	Rhodanese-like domain-containing protein 6 OS=Arabidopsis thaliana OX=3702 GN=STR6 PE=2 SV=1	S	Function unknown	PREDICTED: UPF0483 protein CG5412-like [Solanum tuberosum]	--
Solanum_tuberosum_newGene_6290	--	0	0	0.094573	10	0.082136	8	0.708984	66	0.585051	49	0.864349	75	1.22596e-07	3.6415	up	--	--	Cellular Component: nucleus (GO:0005634);; Biological Process: mitotic chromosome condensation (GO:0007076);; Biological Process: cell division (GO:0051301);;	K06677|1.49058e-19|spen:107031838|K06677 condensin complex subunit 1 | (RefSeq) condensin complex subunit 1	--	[BD]	Chromatin structure and dynamics;; Cell cycle control, cell division, chromosome partitioning	--	--	BD	Chromatin structure and dynamics;; Cell cycle control, cell division, chromosome partitioning	PREDICTED: condensin complex subunit 1 isoform X1 [Solanum pennellii]	cellular component: cell (GO:0005623);; cellular component: organelle (GO:0043226);; cellular component: cell part (GO:0044464);; biological process: cellular process (GO:0009987);; biological process: single-organism process (GO:0044699);; biological process: cellular component organization or biogenesis (GO:0071840)
PGSC0003DMG400002587	Glucose-methanol-choline (Gmc) oxidoreductase	0.112802	10	0.010583	1	0	0	1.69343	129	0.342067	25	1.32767	93	0.00127838	4.66315	up	[E]	Amino acid transport and metabolism	Cellular Component: extracellular region (GO:0005576);; Biological Process: alcohol metabolic process (GO:0006066);; Biological Process: nitrogen compound metabolic process (GO:0006807);; Biological Process: cell-cell signaling (GO:0007267);; Molecular Function: choline dehydrogenase activity (GO:0008812);; Biological Process: embryo sac development (GO:0009553);; Biological Process: fatty acid o…	K15403|0|sot:102588108|K15403 fatty acid omega-hydroxy dehydrogenase [EC:1.1.-.-] | (RefSeq) protein HOTHEAD-like	Cutin, suberine and wax biosynthesis (ko00073)	[R]	General function prediction only	GMC oxidoreductase;; GMC oxidoreductase	Protein HOTHEAD (Precursor) GN=F3N23.17 OS=Arabidopsis thaliana (Mouse-ear cress) PE=1 SV=1	R	General function prediction only	PREDICTED: protein HOTHEAD-like [Solanum lycopersicum]	cellular component: extracellular region (GO:0005576);; biological process: metabolic process (GO:0008152);; biological process: single-organism process (GO:0044699);; biological process: cellular process (GO:0009987);; biological process: signaling (GO:0023052);; molecular function: catalytic activity (GO:0003824);; biological process: multicellular organismal process (GO:0032501);; biological p…
PGSC0003DMG400002156	C-4 sterol methyl oxidase 2	0.776557	14	0.268141	11	0.423463	15	4.20897	139	1.7831	53	2.71153	85	5.5475e-05	2.98186	up	[I]	Lipid transport and metabolism	Biological Process: sulfur amino acid biosynthetic process (GO:0000097);; Molecular Function: iron ion binding (GO:0005506);; Biological Process: acetyl-CoA metabolic process (GO:0006084);; Biological Process: chromatin assembly or disassembly (GO:0006333);; Biological Process: fatty acid biosynthetic process (GO:0006633);; Biological Process: response to abiotic stimulus (GO:0009628);; Cellular …	K14424|0|sot:102589817|K14424 4-alpha-methyl-delta7-sterol-4alpha-methyl oxidase [EC:1.14.13.72] | (RefSeq) methylsterol monooxygenase 2-2-like	Steroid biosynthesis (ko00100)	[I]	Lipid transport and metabolism	Fatty acid hydroxylase superfamily	Methylsterol monooxygenase 2-2 GN=F22G5.23 OS=Arabidopsis thaliana (Mouse-ear cress) PE=2 SV=1	I	Lipid transport and metabolism	PREDICTED: methylsterol monooxygenase 2-2-like isoform 3 [Solanum lycopersicum]	biological process: metabolic process (GO:0008152);; biological process: cellular process (GO:0009987);; biological process: single-organism process (GO:0044699);; molecular function: binding (GO:0005488);; biological process: cellular component organization or biogenesis (GO:0071840);; biological process: response to stimulus (GO:0050896);; cellular component: cell (GO:0005623);; cellular compon…
PGSC0003DMG400014662	RWP-RK domain-containing protein	3.15377	385	4.02857	545	3.62335	440	0.371998	46	0.575975	62	0.474959	49	2.00652e-15	-2.86964	down	--	--	Molecular Function: transcription factor activity, sequence-specific DNA binding (GO:0003700);; Cellular Component: nucleus (GO:0005634);; Biological Process: regulation of transcription, DNA-templated (GO:0006355);; Biological Process: post-translational protein modification (GO:0043687);; Biological Process: positive regulation of transcription, DNA-templated (GO:0045893);;	--	--	--	--	--	Protein NLP2 GN=NLP2 OS=Arabidopsis thaliana (Mouse-ear cress) PE=2 SV=3	K	Transcription	PREDICTED: protein NLP2-like [Solanum lycopersicum]	molecular function: nucleic acid binding transcription factor activity (GO:0001071);; biological process: biological regulation (GO:0065007);; cellular component: cell (GO:0005623);; cellular component: organelle (GO:0043226);; cellular component: cell part (GO:0044464);; biological process: metabolic process (GO:0008152);; biological process: cellular process (GO:0009987)
PGSC0003DMG400006721	Conserved gene of unknown function	0	0	0	0	0	0	5.95324	127	2.14626	41	6.15713	122	8.85698e-10	Inf	up	--	--	--	--	--	--	--	--	Protein TAP1 (Precursor) GN=TAP1 OS=Antirrhinum majus (Garden snapdragon) PE=2 SV=1	--	--	PREDICTED: uncharacterized protein LOC101248720 [Solanum lycopersicum]	--
PGSC0003DMG400025976	Putative bHLH transcription factor	0.310201	21	0.24459	13	0.322454	15	3.47831	215	1.15261	61	1.98446	113	0.00398538	3.1682	up	--	--	Molecular Function: DNA binding (GO:0003677);; Molecular Function: transcription factor activity, sequence-specific DNA binding (GO:0003700);; Molecular Function: binding (GO:0005488);; Molecular Function: protein binding (GO:0005515);; Cellular Component: nucleus (GO:0005634);; Biological Process: regulation of transcription, DNA-templated (GO:0006355);; Biological Process: cellular amino acid m…	--	--	--	--	Helix-loop-helix DNA-binding domain	Transcription factor UNE10 GN=F6N15.11 OS=Arabidopsis thaliana (Mouse-ear cress) PE=2 SV=1	K	Transcription	PREDICTED: transcription factor UNE10-like [Solanum lycopersicum]	molecular function: binding (GO:0005488);; molecular function: nucleic acid binding transcription factor activity (GO:0001071);; biological process: biological regulation (GO:0065007);; cellular component: cell (GO:0005623);; cellular component: organelle (GO:0043226);; cellular component: cell part (GO:0044464);; biological process: metabolic process (GO:0008152);; biological process: cellular p…
PGSC0003DMG400027483	Conserved gene of unknown function	0.148344	9	0.189162	13	0.122779	8	0.928323	54	0.61072	32	1.03341	56	0.000613275	2.47164	up	--	--	--	--	--	--	--	Plant mobile domain	--	--	--	PREDICTED: uncharacterized protein LOC101265850 [Solanum lycopersicum]	--
PGSC0003DMG400012174	ATP binding protein	0.258787	36	0	0	0.164306	23	2.52369	290	0.532461	66	1.7789	202	0.00464071	3.39965	up	[O]	Posttranslational modification, protein turnover, chaperones	Molecular Function: nucleotide binding (GO:0000166);; Molecular Function: calmodulin binding (GO:0005516);; Molecular Function: ATP binding (GO:0005524);; Cellular Component: cell wall (GO:0005618);; Cellular Component: nuclear envelope (GO:0005635);; Cellular Component: nucleoplasm (GO:0005654);; Cellular Component: nucleolus (GO:0005730);; Cellular Component: Golgi apparatus (GO:0005794);; Cell…	--	--	[O]	Posttranslational modification, protein turnover, chaperones	ATPase family associated with various cellular activities (AAA);; AAA domain;; Holliday junction DNA helicase ruvB N-terminus;; AAA domain (dynein-related subfamily)	Katanin p60 ATPase-containing subunit A1 GN=At1g80350 OS=Arabidopsis thaliana (Mouse-ear cress) PE=1 SV=1	O	Posttranslational modification, protein turnover, chaperones	PREDICTED: uncharacterized protein LOC101244308 [Solanum lycopersicum]	molecular function: binding (GO:0005488);; cellular component: cell (GO:0005623);; cellular component: cell part (GO:0044464);; cellular component: organelle (GO:0043226);; cellular component: organelle part (GO:0044422);; cellular component: membrane (GO:0016020);; biological process: metabolic process (GO:0008152);; biological process: cellular process (GO:0009987);; biological process: respons…
PGSC0003DMG400013334	Ubiquitin ligase protein cop1	0.067064	7	0.087564	10	0.152922	15	1.91799	179	0.806387	68	1.97937	172	3.90125e-06	3.91018	up	[T]	Signal transduction mechanisms	Cellular Component: nuclear ubiquitin ligase complex (GO:0000152);; Molecular Function: ubiquitin-protein transferase activity (GO:0004842);; Molecular Function: protein binding (GO:0005515);; Cellular Component: cytoplasm (GO:0005737);; Biological Process: DNA metabolic process (GO:0006259);; Biological Process: DNA repair (GO:0006281);; Biological Process: RNA processing (GO:0006396);; Biologic…	K10143|0|sot:102605430|K10143 E3 ubiquitin-protein ligase RFWD2 [EC:2.3.2.27] | (RefSeq) E3 ubiquitin-protein ligase COP1-like	Ubiquitin mediated proteolysis (ko04120);; Circadian rhythm - plant (ko04712)	--	--	WD domain, G-beta repeat;; Zinc finger, C3HC4 type (RING finger);; Zinc finger, C3HC4 type (RING finger);; Ring finger domain	E3 ubiquitin-protein ligase COP1 GN=COP1 OS=Pisum sativum (Garden pea) PE=2 SV=1	O	Posttranslational modification, protein turnover, chaperones	PREDICTED: E3 ubiquitin-protein ligase COP1-like [Solanum lycopersicum]	cellular component: cell (GO:0005623);; cellular component: macromolecular complex (GO:0032991);; cellular component: organelle (GO:0043226);; cellular component: organelle part (GO:0044422);; cellular component: cell part (GO:0044464);; molecular function: catalytic activity (GO:0003824);; molecular function: binding (GO:0005488);; biological process: metabolic process (GO:0008152);; biological …
PGSC0003DMG400015553	Beta-ketoacyl-coa synthase family protein	0.27852	16	0.016829	2	0.186612	11	3.25014	177	1.41287	68	2.00255	101	4.59867e-06	3.74988	up	--	--	Biological Process: very long-chain fatty acid metabolic process (GO:0000038);; Cellular Component: extracellular region (GO:0005576);; Cellular Component: endoplasmic reticulum (GO:0005783);; Biological Process: polysaccharide metabolic process (GO:0005976);; Biological Process: nucleobase-containing compound metabolic process (GO:0006139);; Biological Process: cellular amino acid metabolic proc…	K15397|0|sot:102593970|K15397 3-ketoacyl-CoA synthase [EC:2.3.1.199] | (RefSeq) 3-ketoacyl-CoA synthase 3-like	Fatty acid elongation (ko00062)	--	--	FAE1/Type III polyketide synthase-like protein;; 3-Oxoacyl-[acyl-carrier-protein (ACP)] synthase III C terminal;; Chalcone and stilbene synthases, C-terminal domain	3-ketoacyl-CoA synthase 3 (Precursor) GN=KCS3 OS=Arabidopsis thaliana (Mouse-ear cress) PE=2 SV=3	R	General function prediction only	PREDICTED: 3-ketoacyl-CoA synthase 3-like [Solanum lycopersicum]	biological process: metabolic process (GO:0008152);; biological process: cellular process (GO:0009987);; biological process: single-organism process (GO:0044699);; cellular component: extracellular region (GO:0005576);; cellular component: cell (GO:0005623);; cellular component: organelle (GO:0043226);; cellular component: cell part (GO:0044464);; biological process: localization (GO:0051179);; b…
Solanum_tuberosum_newGene_4871	--	0	0	0	0	0	0	2.09255	58	2.00456	49	1.34862	35	3.46256e-13	Inf	up	--	--	--	--	--	--	--	Domain of unknown function (DUF4216)	--	S	Function unknown	PREDICTED: uncharacterized protein LOC104233435 [Nicotiana sylvestris]	--
PGSC0003DMG400010998	Actin depolymerizing factor	0.205123	7	0.334192	11	0.454744	14	1.95135	59	1.98272	52	1.62668	45	0.000330201	2.51365	up	--	--	Biological Process: cell morphogenesis (GO:0000902);; Molecular Function: actin binding (GO:0003779);; Cellular Component: nucleus (GO:0005634);; Cellular Component: mitochondrion (GO:0005739);; Cellular Component: cytosol (GO:0005829);; Cellular Component: actin filament (GO:0005884);; Cellular Component: plasma membrane (GO:0005886);; Biological Process: gluconeogenesis (GO:0006094);; Biologica…	K05765|1.52926e-85|sot:102596934|K05765 cofilin | (RefSeq) actin-depolymerizing factor 1-like	--	[Z]	Cytoskeleton	Cofilin/tropomyosin-type actin-binding protein	Actin-depolymerizing factor 1 GN=ADF1 OS=Petunia hybrida (Petunia) PE=2 SV=1	Z	Cytoskeleton	PREDICTED: actin-depolymerizing factor 1-like [Solanum lycopersicum]	biological process: cellular process (GO:0009987);; biological process: developmental process (GO:0032502);; biological process: single-organism process (GO:0044699);; biological process: cellular component organization or biogenesis (GO:0071840);; molecular function: binding (GO:0005488);; cellular component: cell (GO:0005623);; cellular component: organelle (GO:0043226);; cellular component: ce…
PGSC0003DMG400002519	Zinc finger protein	0.107305	5	0.118008	7	0.17497	9	9.76195	454	2.42947	100	5.7973	250	0.000156517	5.43417	up	--	--	Biological Process: very long-chain fatty acid metabolic process (GO:0000038);; Biological Process: polysaccharide biosynthetic process (GO:0000271);; Molecular Function: carboxylic ester hydrolase activity (GO:0004091);; Biological Process: lipid metabolic process (GO:0006629);; Biological Process: pattern specification process (GO:0007389);; Biological Process: regulation of cell size (GO:00083…	--	--	--	--	GDSL-like Lipase/Acylhydrolase	GDSL esterase/lipase APG (Precursor) GN=APG OS=Arabidopsis thaliana (Mouse-ear cress) PE=1 SV=1	R	General function prediction only	PREDICTED: GDSL esterase/lipase APG-like [Solanum lycopersicum]	biological process: metabolic process (GO:0008152);; biological process: cellular process (GO:0009987);; biological process: single-organism process (GO:0044699);; biological process: multicellular organismal process (GO:0032501);; biological process: biological regulation (GO:0065007);; biological process: cellular component organization or biogenesis (GO:0071840);; biological process: growth (G…
PGSC0003DMG400025174	Acyl CoA synthetase	0.315545	16	0.04571	5	0.024628	2	4.54205	322	1.52549	81	4.00159	246	3.04562e-05	5.00662	up	[I]	Lipid transport and metabolism	Biological Process: long-chain fatty acid metabolic process (GO:0001676);; Biological Process: defense response to insect (GO:0002213);; Molecular Function: long-chain fatty acid-CoA ligase activity (GO:0004467);; Cellular Component: nucleus (GO:0005634);; Cellular Component: peroxisome (GO:0005777);; Cellular Component: endoplasmic reticulum (GO:0005783);; Cellular Component: Golgi apparatus (GO…	K01897|0|sot:102589531|K01897 long-chain acyl-CoA synthetase [EC:6.2.1.3] | (RefSeq) long chain acyl-CoA synthetase 2	Fatty acid biosynthesis (ko00061);; Fatty acid degradation (ko00071);; Fatty acid metabolism (ko01212);; Peroxisome (ko04146)	[I]	Lipid transport and metabolism	AMP-binding enzyme	Long chain acyl-CoA synthetase 2 GN=F13F21.14 OS=Arabidopsis thaliana (Mouse-ear cress) PE=2 SV=1	I	Lipid transport and metabolism	PREDICTED: long chain acyl-CoA synthetase 2-like [Solanum lycopersicum]	biological process: metabolic process (GO:0008152);; biological process: cellular process (GO:0009987);; biological process: single-organism process (GO:0044699);; biological process: response to stimulus (GO:0050896);; molecular function: catalytic activity (GO:0003824);; cellular component: cell (GO:0005623);; cellular component: organelle (GO:0043226);; cellular component: cell part (GO:004446…
PGSC0003DMG400024082	AMP dependent ligase	0.068355	5	0	0	0.13881	11	3.40349	249	0.866718	56	1.82386	124	0.000900322	4.88556	up	[IQ]	Lipid transport and metabolism;; Secondary metabolites biosynthesis, transport and catabolism	Molecular Function: acetate-CoA ligase activity (GO:0003987);; Cellular Component: mitochondrion (GO:0005739);; Cellular Component: peroxisome (GO:0005777);; Biological Process: acetate metabolic process (GO:0006083);; Biological Process: glyoxylate cycle (GO:0006097);; Biological Process: metabolic process (GO:0008152);; Molecular Function: o-succinylbenzoate-CoA ligase activity (GO:0008756);; C…	--	--	[I]	Lipid transport and metabolism	AMP-binding enzyme;; AMP-binding enzyme C-terminal domain	Probable acyl-activating enzyme 9 GN=F24J8.1 OS=Arabidopsis thaliana (Mouse-ear cress) PE=2 SV=1	Q	Secondary metabolites biosynthesis, transport and catabolism	PREDICTED: probable acyl-activating enzyme 9-like [Solanum lycopersicum]	molecular function: catalytic activity (GO:0003824);; cellular component: cell (GO:0005623);; cellular component: organelle (GO:0043226);; cellular component: cell part (GO:0044464);; biological process: metabolic process (GO:0008152);; biological process: cellular process (GO:0009987);; biological process: single-organism process (GO:0044699);; biological process: signaling (GO:0023052);; biolog…
Solanum_tuberosum_newGene_3150	--	0	0	0.020518	3	0	0	2.92775	302	5.73655	520	6.14465	564	2.03508e-18	9.17424	up	--	--	Cellular Component: nuclear envelope (GO:0005635);; Cellular Component: cytosol (GO:0005829);; Biological Process: protein import into nucleus (GO:0006606);; Molecular Function: Ran GTPase binding (GO:0008536);; Molecular Function: protein transporter activity (GO:0008565);;	K20224|0|sot:102594878|K20224 importin-9 | (RefSeq) importin-9	--	[UY]	Intracellular trafficking, secretion, and vesicular transport;; Nuclear structure	HEAT-like repeat	--	O	Posttranslational modification, protein turnover, chaperones	PREDICTED: importin-9 isoform X1 [Solanum tuberosum]	cellular component: cell (GO:0005623);; cellular component: organelle (GO:0043226);; cellular component: organelle part (GO:0044422);; cellular component: cell part (GO:0044464);; biological process: single-organism process (GO:0044699);; biological process: localization (GO:0051179);; molecular function: binding (GO:0005488);; molecular function: transporter activity (GO:0005215)
PGSC0003DMG400023018	Gene of unknown function	0.624466	46	1.20868	97	0.9271	67	0.053968	4	0.157049	11	0.104361	7	1.15859e-05	-2.96616	down	--	--	--	--	--	--	--	--	F-box protein At1g80960 GN=At1g80960 OS=Arabidopsis thaliana (Mouse-ear cress) PE=2 SV=3	--	--	--	--
PGSC0003DMG402000299	Serine-threonine protein kinase, plant-type	0	0	0.013643	3	0.090073	12	0.857047	66	0.294527	30	0.770561	72	8.28908e-06	3.67387	up	[S]	Function unknown	Molecular Function: protein kinase activity (GO:0004672);; Molecular Function: binding (GO:0005488);; Biological Process: ion transport (GO:0006811);; Biological Process: epidermis development (GO:0008544);; Biological Process: detection of external stimulus (GO:0009581);; Biological Process: detection of biotic stimulus (GO:0009595);; Biological Process: response to bacterium (GO:0009617);; Biol…	--	--	--	--	Leucine Rich repeats (2 copies);; Leucine rich repeat;; Leucine Rich Repeat;; Leucine Rich repeat;; Leucine rich repeat;; Leucine rich repeat N-terminal domain	LRR receptor-like serine/threonine-protein kinase EFR (Precursor) GN=EFR OS=Arabidopsis thaliana (Mouse-ear cress) PE=1 SV=1	S	Function unknown	PREDICTED: LRR receptor-like serine/threonine-protein kinase EFR-like [Solanum lycopersicum]	molecular function: catalytic activity (GO:0003824);; biological process: metabolic process (GO:0008152);; biological process: cellular process (GO:0009987);; molecular function: binding (GO:0005488);; biological process: localization (GO:0051179);; biological process: developmental process (GO:0032502);; biological process: response to stimulus (GO:0050896);; biological process: multi-organism p…
PGSC0003DMG400011170	Protein WAX2	0.074095	5	0	0	0.252311	17	3.8939	262	1.85593	75	4.09537	254	2.48388e-05	4.90821	up	[I]	Lipid transport and metabolism	Biological Process: very long-chain fatty acid metabolic process (GO:0000038);; Molecular Function: nucleotide binding (GO:0000166);; Molecular Function: iron ion binding (GO:0005506);; Cellular Component: plasma membrane (GO:0005886);; Biological Process: fatty acid biosynthetic process (GO:0006633);; Biological Process: cuticle hydrocarbon biosynthetic process (GO:0006723);; Biological Process:…	--	--	--	--	Fatty acid hydroxylase superfamily	Protein ECERIFERUM 3 GN=MTI20.3 OS=Arabidopsis thaliana (Mouse-ear cress) PE=1 SV=1	I	Lipid transport and metabolism	PREDICTED: protein ECERIFERUM 3-like [Solanum lycopersicum]	biological process: metabolic process (GO:0008152);; biological process: cellular process (GO:0009987);; biological process: single-organism process (GO:0044699);; molecular function: binding (GO:0005488);; cellular component: cell (GO:0005623);; cellular component: membrane (GO:0016020);; cellular component: cell part (GO:0044464);; biological process: response to stimulus (GO:0050896);; cellula…
PGSC0003DMG400027054	Kunitz-type protease inhibitor KPI-D12	1.27898	32	2.45325	67	1.63109	40	25.7193	631	37.558	815	26.8511	611	1.14332e-17	4.14851	up	--	--	Molecular Function: endopeptidase inhibitor activity (GO:0004866);;	--	--	--	--	Trypsin and protease inhibitor	Miraculin (Precursor) OS=Synsepalum dulcificum (Miracle fruit) PE=1 SV=3	R	General function prediction only	PREDICTED: miraculin-like [Solanum lycopersicum]	molecular function: molecular function regulator (GO:0098772);; biological process: biological regulation (GO:0065007)
PGSC0003DMG400014311	CRT binding factor 3	59.8073	2181	51.5332	2085	56.1706	2039	261.258	9524	338.015	10895	290.453	9811	1.65455e-22	2.50491	up	--	--	Molecular Function: DNA binding (GO:0003677);; Molecular Function: transcription factor activity, sequence-specific DNA binding (GO:0003700);; Cellular Component: nucleus (GO:0005634);; Biological Process: regulation of transcription, DNA-templated (GO:0006355);; Biological Process: response to heat (GO:0009408);; Biological Process: response to water deprivation (GO:0009414);; Cellular Component…	K09286|1.85291e-159|sot:102577707|K09286 EREBP-like factor | (RefSeq) CBF3; AP2 domain CBF protein	--	--	--	AP2 domain	Dehydration-responsive element-binding protein 1A GN=At4g25480 OS=Arabidopsis thaliana (Mouse-ear cress) PE=1 SV=2	K	Transcription	CRT binding factor 3 [Solanum tuberosum]	molecular function: binding (GO:0005488);; molecular function: nucleic acid binding transcription factor activity (GO:0001071);; biological process: biological regulation (GO:0065007);; cellular component: cell (GO:0005623);; cellular component: organelle (GO:0043226);; cellular component: cell part (GO:0044464);; biological process: response to stimulus (GO:0050896);; biological process: cellula…
Solanum_tuberosum_newGene_12490	--	0.292696	14	0.277313	15	0.188804	9	1.17962	56	1.42927	60	1.80442	79	7.15447e-05	2.60949	up	--	--	--	--	--	--	--	--	B3 domain-containing protein At4g34400 OS=Arabidopsis thaliana OX=3702 GN=At4g34400 PE=2 SV=2	K	Transcription	PREDICTED: B3 domain-containing transcription factor VRN1-like [Solanum pennellii]	--
PGSC0003DMG400023989	Conserved gene of unknown function	0.567717	21	0.283233	12	0.04239	2	1.98347	71	1.44084	46	1.72708	58	0.000157884	2.54972	up	--	--	--	--	--	--	--	--	--	S	Function unknown	PREDICTED: uncharacterized protein LOC101267370 [Solanum lycopersicum]	--
PGSC0003DMG400020718	Heat-shock protein	12.7061	393	7.01725	241	9.28932	286	53.4132	1649	43.6704	1192	41.279	1181	1.53891e-24	2.34503	up	[O]	Posttranslational modification, protein turnover, chaperones	Cellular Component: endoplasmic reticulum (GO:0005783);; Biological Process: protein folding (GO:0006457);; Cellular Component: chloroplast (GO:0009507);; Biological Process: response to high light intensity (GO:0009644);; Biological Process: response to salt stress (GO:0009651);; Biological Process: heat acclimation (GO:0010286);; Cellular Component: membrane (GO:0016020);; Cellular Component: c…	K13993|1.30251e-136|sot:102601494|K13993 HSP20 family protein | (RefSeq) HSP22.7; 22.7 kDa class IV heat shock protein-like	Protein processing in endoplasmic reticulum (ko04141)	[O]	Posttranslational modification, protein turnover, chaperones	Hsp20/alpha crystallin family	22.7 kDa class IV heat shock protein (Precursor) GN=HSP22.7 OS=Pisum sativum (Garden pea) PE=2 SV=1	O	Posttranslational modification, protein turnover, chaperones	PREDICTED: 22.7 kDa class IV heat shock protein-like [Solanum lycopersicum]	cellular component: cell (GO:0005623);; cellular component: organelle (GO:0043226);; cellular component: cell part (GO:0044464);; biological process: cellular process (GO:0009987);; biological process: response to stimulus (GO:0050896);; cellular component: membrane (GO:0016020);; biological process: cellular component organization or biogenesis (GO:0071840)
PGSC0003DMG400027761	Conserved gene of unknown function	0.621494	10	0.492129	30	0.212585	12	3.21316	184	1.4976	85	1.89194	102	2.35639e-06	3.05731	up	[KR]	Transcription;; General function prediction only	Molecular Function: N-acetyltransferase activity (GO:0008080);; Biological Process: metabolic process (GO:0008152);;	--	--	--	--	Acetyltransferase (GNAT) family;; FR47-like protein;; Acetyltransferase (GNAT) domain;; Acetyltransferase (GNAT) domain;; Acetyltransferase (GNAT) domain;; Acetyltransferase (GNAT) domain;; Acetyltransferase (GNAT) domain	--	R	General function prediction only	PREDICTED: uncharacterized protein LOC101263025 [Solanum lycopersicum]	molecular function: catalytic activity (GO:0003824);; biological process: metabolic process (GO:0008152)
PGSC0003DMG400005837	AP2/ERF domain-containing transcription factor	1.19702	60	1.77858	99	1.2126	61	0.115354	6	0	0	0.190824	9	2.31769e-07	-3.67134	down	--	--	Biological Process: respiratory burst involved in defense response (GO:0002679);; Molecular Function: DNA binding (GO:0003677);; Molecular Function: transcription factor activity, sequence-specific DNA binding (GO:0003700);; Molecular Function: protein binding (GO:0005515);; Cellular Component: nucleus (GO:0005634);; Cellular Component: nucleolus (GO:0005730);; Cellular Component: cytoplasm (GO:0…	--	--	--	--	AP2 domain	Ethylene-responsive transcription factor ERF061 GN=ERF061 OS=Arabidopsis thaliana (Mouse-ear cress) PE=2 SV=1	K	Transcription	PREDICTED: ethylene-responsive transcription factor ERF061-like [Solanum lycopersicum]	biological process: immune system process (GO:0002376);; biological process: metabolic process (GO:0008152);; biological process: single-organism process (GO:0044699);; molecular function: binding (GO:0005488);; molecular function: nucleic acid binding transcription factor activity (GO:0001071);; biological process: biological regulation (GO:0065007);; cellular component: cell (GO:0005623);; cell…
PGSC0003DMG400030246	Transcription factor	0.946364	42	0.635115	30	0.955737	33	6.6767	302	2.81675	113	5.12756	214	6.66102e-05	2.77767	up	--	--	Molecular Function: transcription factor activity, sequence-specific DNA binding (GO:0003700);; Molecular Function: protein binding (GO:0005515);; Cellular Component: nucleolus (GO:0005730);; Biological Process: regulation of transcription, DNA-templated (GO:0006355);; Biological Process: pattern specification process (GO:0007389);; Biological Process: toxin catabolic process (GO:0009407);; Biolo…	--	--	[K]	Transcription	Myb/SANT-like DNA-binding domain	Trihelix transcription factor GT-3b GN=F16M14.18 OS=Arabidopsis thaliana (Mouse-ear cress) PE=1 SV=1	K	Transcription	PREDICTED: trihelix transcription factor GT-3b-like [Solanum lycopersicum]	molecular function: nucleic acid binding transcription factor activity (GO:0001071);; biological process: biological regulation (GO:0065007);; molecular function: binding (GO:0005488);; cellular component: cell (GO:0005623);; cellular component: organelle (GO:0043226);; cellular component: organelle part (GO:0044422);; cellular component: cell part (GO:0044464);; biological process: multicellular…
Solanum_tuberosum_newGene_6966	--	0.037103	3	0.026318	2	0.008538	1	1.53567	92	0.787561	42	0.524342	29	0.000147469	4.96104	up	[P]	Inorganic ion transport and metabolism	Molecular Function: nucleotide binding (GO:0000166);; Cellular Component: integral component of plasma membrane (GO:0005887);; Cellular Component: chloroplast thylakoid membrane (GO:0009535);; Biological Process: copper ion transmembrane transport (GO:0035434);; Molecular Function: copper-transporting ATPase activity (GO:0043682);; Molecular Function: metal ion binding (GO:0046872);;	K01533|0|sot:102600832|K01533 Cu2+-exporting ATPase [EC:3.6.3.4] | (RefSeq) copper-transporting ATPase PAA2, chloroplastic-like	--	[P]	Inorganic ion transport and metabolism	haloacid dehalogenase-like hydrolase;; E1-E2 ATPase	Copper-transporting ATPase PAA2, chloroplastic OS=Arabidopsis thaliana OX=3702 GN=PAA2 PE=1 SV=1	P	Inorganic ion transport and metabolism	PREDICTED: copper-transporting ATPase PAA2, chloroplastic-like isoform X3 [Solanum tuberosum]	molecular function: binding (GO:0005488);; cellular component: cell (GO:0005623);; cellular component: membrane (GO:0016020);; cellular component: membrane part (GO:0044425);; cellular component: cell part (GO:0044464);; cellular component: organelle (GO:0043226);; cellular component: organelle part (GO:0044422);; biological process: localization (GO:0051179);; molecular function: catalytic activ…
PGSC0003DMG400019120	Oxidoreductase	0.138031	6	0.103813	6	0.446486	19	1.88792	57	1.55568	44	2.3491	69	8.09e-05	2.66618	up	[R]	General function prediction only	Molecular Function: iron ion binding (GO:0005506);; Biological Process: response to abscisic acid (GO:0009737);; Biological Process: embryo development ending in seed dormancy (GO:0009793);; Biological Process: flavonoid biosynthetic process (GO:0009813);; Biological Process: cell wall modification involved in abscission (GO:0009830);; Biological Process: seed germination (GO:0009845);; Biologica…	--	--	[QR]	Secondary metabolites biosynthesis, transport and catabolism;; General function prediction only	2OG-Fe(II) oxygenase superfamily	Probable 2-oxoglutarate/Fe(II)-dependent dioxygenase GN=DIOX2 OS=Papaver somniferum (Opium poppy) PE=2 SV=1	R	General function prediction only	PREDICTED: leucoanthocyanidin dioxygenase-like [Solanum lycopersicum]	molecular function: binding (GO:0005488);; biological process: response to stimulus (GO:0050896);; biological process: reproduction (GO:0000003);; biological process: reproductive process (GO:0022414);; biological process: multicellular organismal process (GO:0032501);; biological process: developmental process (GO:0032502);; biological process: single-organism process (GO:0044699);; biological p…
PGSC0003DMG400015726	Glutathione s-transferase	0.521834	16	0	0	0.365134	11	8.88088	269	2.87772	77	5.59866	157	7.4726e-05	4.37835	up	[O]	Posttranslational modification, protein turnover, chaperones	Molecular Function: glutathione transferase activity (GO:0004364);; Molecular Function: lactoylglutathione lyase activity (GO:0004462);; Cellular Component: nucleus (GO:0005634);; Cellular Component: cytosol (GO:0005829);; Biological Process: pentose-phosphate shunt (GO:0006098);; Biological Process: fatty acid beta-oxidation (GO:0006635);; Biological Process: glutathione metabolic process (GO:00…	K00799|1.04123e-146|sot:102599652|K00799 glutathione S-transferase [EC:2.5.1.18] | (RefSeq) glutathione S-transferase U17-like	Glutathione metabolism (ko00480)	[O]	Posttranslational modification, protein turnover, chaperones	Glutathione S-transferase, N-terminal domain;; Glutathione S-transferase, N-terminal domain;; Glutathione S-transferase, C-terminal domain;; Glutathione S-transferase, N-terminal domain;; Glutathione S-transferase, C-terminal domain	Glutathione S-transferase U17 GN=At1g10370 OS=Arabidopsis thaliana (Mouse-ear cress) PE=2 SV=1	O	Posttranslational modification, protein turnover, chaperones	hypothetical protein PRUPE_ppa010869mg [Prunus persica]	molecular function: catalytic activity (GO:0003824);; cellular component: cell (GO:0005623);; cellular component: organelle (GO:0043226);; cellular component: cell part (GO:0044464);; biological process: metabolic process (GO:0008152);; biological process: cellular process (GO:0009987);; biological process: single-organism process (GO:0044699);; biological process: developmental process (GO:00325…
PGSC0003DMG400010136	Stigma expressed protein	0.462438	14	0.258559	9	0.132592	4	13.7659	389	3.28941	83	11.6057	304	0.000170063	5.03748	up	--	--	Molecular Function: peptidase inhibitor activity (GO:0030414);;	--	--	--	--	Trypsin and protease inhibitor	Cysteine protease inhibitor 9 (Precursor) OS=Solanum tuberosum (Potato) PE=2 SV=1	--	--	PREDICTED: cysteine protease inhibitor 8-like [Solanum lycopersicum]	molecular function: molecular function regulator (GO:0098772);; biological process: biological regulation (GO:0065007)
Solanum_tuberosum_newGene_6662	--	1.92308	47	2.86617	84	2.98126	75	0.278061	8	0.073718	3	0.101533	3	3.92636e-07	-3.68773	down	--	--	--	--	--	--	--	--	--	S	Function unknown	PREDICTED: uncharacterized protein LOC107019269 [Solanum pennellii]	--
PGSC0003DMG400001904	Non-specific lipid-transfer protein 1	1.11046	27	0.208342	6	0.681624	17	34.2037	812	11.051	232	27.8693	613	1.15852e-06	5.22637	up	--	--	Biological Process: lipid transport (GO:0006869);; Biological Process: defense response (GO:0006952);; Molecular Function: lipid binding (GO:0008289);; Biological Process: response to biotic stimulus (GO:0009607);; Biological Process: multi-organism process (GO:0051704);;	--	--	--	--	Protease inhibitor/seed storage/LTP family;; Probable lipid transfer	Non-specific lipid-transfer protein 1 (Precursor) GN=LTP1 OS=Nicotiana tabacum (Common tobacco) PE=1 SV=1	S	Function unknown	RecName: Full=Non-specific lipid-transfer protein 1; Short=LTP 1; AltName: Full=Pathogenesis-related protein 14; Short=PR-14; Flags: Precursor	biological process: single-organism process (GO:0044699);; biological process: localization (GO:0051179);; biological process: response to stimulus (GO:0050896);; molecular function: binding (GO:0005488);; biological process: multi-organism process (GO:0051704)
PGSC0003DMG400005563	Acyltransferase	0.169798	9	0.068572	4	0.218617	16	1.61536	106	0.719683	43	1.32299	83	2.77058e-06	3.18123	up	[Q]	Secondary metabolites biosynthesis, transport and catabolism	Biological Process: very long-chain fatty acid metabolic process (GO:0000038);; Biological Process: sulfur amino acid metabolic process (GO:0000096);; Biological Process: polysaccharide biosynthetic process (GO:0000271);; Cellular Component: extracellular region (GO:0005576);; Cellular Component: nucleus (GO:0005634);; Cellular Component: endoplasmic reticulum (GO:0005783);; Biological Process: a…	K15397|0|sot:102590104|K15397 3-ketoacyl-CoA synthase [EC:2.3.1.199] | (RefSeq) 3-ketoacyl-CoA synthase 20-like	Fatty acid elongation (ko00062)	--	--	FAE1/Type III polyketide synthase-like protein;; 3-Oxoacyl-[acyl-carrier-protein (ACP)] synthase III C terminal;; Chalcone and stilbene synthases, C-terminal domain;; 3-Oxoacyl-[acyl-carrier-protein (ACP)] synthase III;; Chalcone and stilbene synthases, N-terminal domain	3-ketoacyl-CoA synthase 19 GN=KCS19 OS=Arabidopsis thaliana (Mouse-ear cress) PE=2 SV=1	Q	Secondary metabolites biosynthesis, transport and catabolism	PREDICTED: 3-ketoacyl-CoA synthase 11-like [Solanum lycopersicum]	biological process: metabolic process (GO:0008152);; biological process: cellular process (GO:0009987);; biological process: single-organism process (GO:0044699);; cellular component: extracellular region (GO:0005576);; cellular component: cell (GO:0005623);; cellular component: organelle (GO:0043226);; cellular component: cell part (GO:0044464);; biological process: localization (GO:0051179);; b…
PGSC0003DMG400027276	Mg protoporphyrin IX chelatase	0.682151	30	0.012493	3	0.18305	6	1.15252	169	0.687059	68	0.835331	114	3.04412e-06	3.35501	up	[H]	Coenzyme transport and metabolism	Molecular Function: ATP binding (GO:0005524);; Cellular Component: mitochondrion (GO:0005739);; Cellular Component: chloroplast stroma (GO:0009570);; Cellular Component: chloroplast inner membrane (GO:0009706);; Cellular Component: magnesium chelatase complex (GO:0010007);; Biological Process: chlorophyll biosynthetic process (GO:0015995);; Molecular Function: magnesium chelatase activity (GO:001…	K03403|0|sot:102605088|K03403 magnesium chelatase subunit H [EC:6.6.1.1] | (RefSeq) magnesium-chelatase subunit ChlH, chloroplastic	Porphyrin and chlorophyll metabolism (ko00860)	--	--	CobN/Magnesium Chelatase;; Domain of unknown function (DUF3479)	Magnesium-chelatase subunit ChlH, chloroplastic (Precursor) GN=At5g13630 OS=Arabidopsis thaliana (Mouse-ear cress) PE=1 SV=1	H	Coenzyme transport and metabolism	PREDICTED: magnesium-chelatase subunit ChlH, chloroplastic-like [Solanum lycopersicum]	molecular function: binding (GO:0005488);; cellular component: cell (GO:0005623);; cellular component: organelle (GO:0043226);; cellular component: cell part (GO:0044464);; cellular component: organelle part (GO:0044422);; cellular component: membrane (GO:0016020);; cellular component: macromolecular complex (GO:0032991);; biological process: metabolic process (GO:0008152);; biological process: c…
PGSC0003DMG400011631	Chloroplast small heat shock protein class I	7.3918	205	1.48878	46	3.89307	108	23.6819	656	25.1051	615	21.5206	552	2.06448e-18	2.56349	up	[O]	Posttranslational modification, protein turnover, chaperones	Cellular Component: nucleus (GO:0005634);; Cellular Component: cytoplasm (GO:0005737);; Biological Process: protein folding (GO:0006457);; Biological Process: response to stress (GO:0006950);; Biological Process: response to high light intensity (GO:0009644);; Biological Process: heat acclimation (GO:0010286);; Biological Process: response to hydrogen peroxide (GO:0042542);; Biological Process: r…	K13993|1.79896e-89|sot:102588746|K13993 HSP20 family protein | (RefSeq) 18.2 kDa class I heat shock protein-like	Protein processing in endoplasmic reticulum (ko04141)	[O]	Posttranslational modification, protein turnover, chaperones	Hsp20/alpha crystallin family	18.2 kDa class I heat shock protein GN=HSP18.2 OS=Medicago sativa (Alfalfa) PE=2 SV=1	O	Posttranslational modification, protein turnover, chaperones	PREDICTED: 18.2 kDa class I heat shock protein-like isoform 1 [Solanum lycopersicum]	cellular component: cell (GO:0005623);; cellular component: organelle (GO:0043226);; cellular component: cell part (GO:0044464);; biological process: cellular process (GO:0009987);; biological process: response to stimulus (GO:0050896);; biological process: cellular component organization or biogenesis (GO:0071840)
PGSC0003DMG400000850	Conserved gene of unknown function	0.332711	14	0.155812	8	0.090351	4	1.85955	76	0.88982	33	1.16416	44	7.97099e-05	2.75941	up	[QR]	Secondary metabolites biosynthesis, transport and catabolism;; General function prediction only	Cellular Component: cytoplasm (GO:0005737);; Molecular Function: methyltransferase activity (GO:0008168);; Biological Process: isoflavonoid phytoalexin biosynthetic process (GO:0009701);; Biological Process: flavonoid metabolic process (GO:0009812);; Biological Process: alkaloid biosynthetic process (GO:0009821);; Molecular Function: isoflavone 4'-O-methyltransferase activity (GO:0030746);; Molec…	--	--	[R]	General function prediction only	O-methyltransferase;; Dimerisation domain	Trans-resveratrol di-O-methyltransferase GN=ROMT OS=Vitis vinifera (Grape) PE=1 SV=2	R	General function prediction only	PREDICTED: myricetin O-methyltransferase-like [Solanum lycopersicum]	cellular component: cell (GO:0005623);; cellular component: cell part (GO:0044464);; molecular function: catalytic activity (GO:0003824);; biological process: metabolic process (GO:0008152);; biological process: cellular process (GO:0009987);; biological process: single-organism process (GO:0044699);; molecular function: binding (GO:0005488)
PGSC0003DMG400011366	Transposon MuDR mudrA	0.50416	14	0.068343	2	0.157778	5	1.20845	32	1.80212	42	1.82638	44	0.000372549	2.72494	up	--	--	--	--	--	--	--	--	--	R	General function prediction only	PREDICTED: uncharacterized protein LOC101264482 [Solanum lycopersicum]	--
PGSC0003DMG400011235	Steroid binding protein	3.70516	65	6.08042	118	4.9604	86	0.233203	5	0.06594	2	0.125848	3	1.49891e-10	-4.54412	down	--	--	Cellular Component: extracellular region (GO:0005576);; Cellular Component: nucleus (GO:0005634);; Cellular Component: endoplasmic reticulum (GO:0005783);; Cellular Component: cytosol (GO:0005829);; Cellular Component: plasma membrane (GO:0005886);; Cellular Component: chloroplast thylakoid membrane (GO:0009535);; Biological Process: indoleacetic acid biosynthetic process (GO:0009684);; Biologica…	K17278|5.18715e-67|sot:102583872|K17278 membrane-associated progesterone receptor component | (RefSeq) probable steroid-binding protein 3	--	[R]	General function prediction only	Cytochrome b5-like Heme/Steroid binding domain	Probable steroid-binding protein 3 GN=MP3 OS=Arabidopsis thaliana (Mouse-ear cress) PE=1 SV=1	R	General function prediction only	PREDICTED: probable steroid-binding protein 3-like [Solanum lycopersicum]	cellular component: extracellular region (GO:0005576);; cellular component: cell (GO:0005623);; cellular component: organelle (GO:0043226);; cellular component: cell part (GO:0044464);; cellular component: membrane (GO:0016020);; cellular component: organelle part (GO:0044422);; biological process: metabolic process (GO:0008152);; biological process: cellular process (GO:0009987);; biological pro…
PGSC0003DMG400009719	1-aminocyclopropane-1-carboxylate oxidase	1.01414	35	1.15379	45	1.17379	41	0.145074	5	0.065811	2	0	0	7.05669e-06	-3.93838	down	[R]	General function prediction only	Cellular Component: cytoplasm (GO:0005737);; Biological Process: transport (GO:0006810);; Biological Process: defense response (GO:0006952);; Biological Process: response to bacterium (GO:0009617);; Biological Process: response to abiotic stimulus (GO:0009628);; Biological Process: flavonoid biosynthetic process (GO:0009813);; Biological Process: response to iron(III) ion (GO:0010041);; Cellular …	--	--	[QR]	Secondary metabolites biosynthesis, transport and catabolism;; General function prediction only	non-haem dioxygenase in morphine synthesis N-terminal;; 2OG-Fe(II) oxygenase superfamily	Hyoscyamine 6-dioxygenase GN=H6H OS=Hyoscyamus niger (Black henbane) PE=1 SV=1	R	General function prediction only	PREDICTED: hyoscyamine 6-dioxygenase-like [Solanum lycopersicum]	cellular component: cell (GO:0005623);; cellular component: cell part (GO:0044464);; biological process: localization (GO:0051179);; biological process: response to stimulus (GO:0050896);; biological process: multi-organism process (GO:0051704);; biological process: metabolic process (GO:0008152);; cellular component: membrane (GO:0016020);; molecular function: catalytic activity (GO:0003824);; b…
PGSC0003DMG400000684	Laccase	1.3994	89	0.559678	40	1.03393	66	0.220184	14	0.161583	10	0.086238	6	0.00175912	-2.49414	down	[Q]	Secondary metabolites biosynthesis, transport and catabolism	Molecular Function: copper ion binding (GO:0005507);; Cellular Component: extracellular region (GO:0005576);; Biological Process: iron ion transport (GO:0006826);; Molecular Function: L-ascorbate oxidase activity (GO:0008447);; Biological Process: response to water deprivation (GO:0009414);; Biological Process: cellular response to iron ion starvation (GO:0010106);; Biological Process: response t…	K05909|0|sot:102582004|K05909 laccase [EC:1.10.3.2] | (RefSeq) laccase-7-like	--	[Q]	Secondary metabolites biosynthesis, transport and catabolism	Multicopper oxidase;; Multicopper oxidase;; Multicopper oxidase	Laccase-7 (Precursor) GN=LAC7 OS=Arabidopsis thaliana (Mouse-ear cress) PE=2 SV=1	Q	Secondary metabolites biosynthesis, transport and catabolism	laccase precursor [Solanum lycopersicum]	molecular function: binding (GO:0005488);; cellular component: extracellular region (GO:0005576);; biological process: localization (GO:0051179);; molecular function: catalytic activity (GO:0003824);; biological process: metabolic process (GO:0008152);; biological process: single-organism process (GO:0044699);; biological process: response to stimulus (GO:0050896);; biological process: cellular p…
PGSC0003DMG400001627	Conserved gene of unknown function	0.554882	23	1.3524	62	0.27884	12	15.8549	655	4.28969	157	10.8421	415	0.00132456	3.87469	up	--	--	--	--	--	--	--	Pollen proteins Ole e I like	Leucine-rich repeat extensin-like protein 5 (Precursor) GN=LRX5 OS=Arabidopsis thaliana (Mouse-ear cress) PE=2 SV=2	R	General function prediction only	PREDICTED: uncharacterized protein LOC101256630 [Solanum lycopersicum]	--
PGSC0003DMG400007390	Beta-ketoacyl-CoA synthase	0.851108	56	0.112299	9	0.185953	13	11.4679	730	2.96943	168	6.84814	405	0.00130607	4.23	up	--	--	Biological Process: very long-chain fatty acid metabolic process (GO:0000038);; Biological Process: sulfur amino acid metabolic process (GO:0000096);; Biological Process: polysaccharide biosynthetic process (GO:0000271);; Cellular Component: nucleus (GO:0005634);; Cellular Component: endoplasmic reticulum (GO:0005783);; Biological Process: acetyl-CoA metabolic process (GO:0006084);; Biological Pr…	K15397|0|sot:102596949|K15397 3-ketoacyl-CoA synthase [EC:2.3.1.199] | (RefSeq) 3-ketoacyl-CoA synthase 10	Fatty acid elongation (ko00062)	--	--	FAE1/Type III polyketide synthase-like protein;; 3-Oxoacyl-[acyl-carrier-protein (ACP)] synthase III C terminal;; Chalcone and stilbene synthases, C-terminal domain	3-ketoacyl-CoA synthase 10 GN=T1D16.11 OS=Arabidopsis thaliana (Mouse-ear cress) PE=1 SV=2	I	Lipid transport and metabolism	PREDICTED: 3-ketoacyl-CoA synthase 10-like [Solanum lycopersicum]	biological process: metabolic process (GO:0008152);; biological process: cellular process (GO:0009987);; biological process: single-organism process (GO:0044699);; cellular component: cell (GO:0005623);; cellular component: organelle (GO:0043226);; cellular component: cell part (GO:0044464);; biological process: localization (GO:0051179);; biological process: cellular component organization or bi…
PGSC0003DMG400024476	Heat-shock protein	3.03691	101	1.06827	40	3.54912	117	16.0315	530	11.2277	328	13.1703	403	3.10272e-13	2.48824	up	[O]	Posttranslational modification, protein turnover, chaperones	Cellular Component: endoplasmic reticulum (GO:0005783);; Biological Process: protein folding (GO:0006457);; Cellular Component: chloroplast (GO:0009507);; Biological Process: response to high light intensity (GO:0009644);; Biological Process: heat acclimation (GO:0010286);; Cellular Component: membrane (GO:0016020);; Cellular Component: cytoplasmic vesicle (GO:0016023);; Biological Process: respo…	K13993|3.76403e-125|sot:102584371|K13993 HSP20 family protein | (RefSeq) 22.7 kDa class IV heat shock protein-like	Protein processing in endoplasmic reticulum (ko04141)	[O]	Posttranslational modification, protein turnover, chaperones	Hsp20/alpha crystallin family	22.7 kDa class IV heat shock protein (Precursor) GN=HSP22.7 OS=Pisum sativum (Garden pea) PE=2 SV=1	O	Posttranslational modification, protein turnover, chaperones	PREDICTED: 22.7 kDa class IV heat shock protein-like [Solanum lycopersicum]	cellular component: cell (GO:0005623);; cellular component: organelle (GO:0043226);; cellular component: cell part (GO:0044464);; biological process: cellular process (GO:0009987);; biological process: response to stimulus (GO:0050896);; cellular component: membrane (GO:0016020);; biological process: cellular component organization or biogenesis (GO:0071840)
PGSC0003DMG400011771	Amino acid transporter	38.8603	2462	36.6752	2154	39.0112	2352	370.403	22662	306.617	17001	325.188	18507	3.40787e-56	3.28398	up	--	--	Cellular Component: integral component of plasma membrane (GO:0005887);; Biological Process: protein targeting to membrane (GO:0006612);; Biological Process: water transport (GO:0006833);; Biological Process: response to nematode (GO:0009624);; Biological Process: response to salt stress (GO:0009651);; Biological Process: response to fructose (GO:0009750);; Biological Process: positive regulation…	--	--	[E]	Amino acid transport and metabolism	Transmembrane amino acid transporter protein	Amino acid permease 3 GN=AAP3 OS=Arabidopsis thaliana (Mouse-ear cress) PE=1 SV=2	E	Amino acid transport and metabolism	amino acid transporter [Solanum lycopersicum]	cellular component: cell (GO:0005623);; cellular component: membrane (GO:0016020);; cellular component: membrane part (GO:0044425);; cellular component: cell part (GO:0044464);; biological process: localization (GO:0051179);; biological process: single-organism process (GO:0044699);; biological process: response to stimulus (GO:0050896);; biological process: multi-organism process (GO:0051704);; …
PGSC0003DMG400033044	Gip1	0.172516	4	0.025424	1	0.626892	13	10.8695	210	5.79186	99	12.4819	223	9.62344e-11	5.06569	up	--	--	Molecular Function: protein binding (GO:0005515);; Cellular Component: extracellular region (GO:0005576);; Cellular Component: plasma membrane (GO:0005886);; Cellular Component: plasmodesma (GO:0009506);; Biological Process: response to salt stress (GO:0009651);; Biological Process: response to abscisic acid (GO:0009737);; Biological Process: gibberellic acid mediated signaling pathway (GO:000974…	--	--	--	--	Gibberellin regulated protein	Gibberellin-regulated protein 6 (Precursor) GN=GASA6 OS=Arabidopsis thaliana (Mouse-ear cress) PE=2 SV=1	R	General function prediction only	PREDICTED: gibberellin-regulated protein 6-like [Solanum lycopersicum]	molecular function: binding (GO:0005488);; cellular component: extracellular region (GO:0005576);; cellular component: cell (GO:0005623);; cellular component: membrane (GO:0016020);; cellular component: cell part (GO:0044464);; cellular component: cell junction (GO:0030054);; biological process: response to stimulus (GO:0050896);; biological process: cellular process (GO:0009987);; biological pro…
PGSC0003DMG401032203	Extensin	10.5248	308	3.12991	102	4.24671	124	72.0865	2108	24.7537	641	48.9335	1327	0.000898526	3.11398	up	--	--	Molecular Function: single-stranded DNA binding (GO:0003697);; Molecular Function: RNA binding (GO:0003723);; Molecular Function: structural constituent of cell wall (GO:0005199);; Molecular Function: protein binding (GO:0005515);; Biological Process: defense response (GO:0006952);; Biological Process: response to cold (GO:0009409);; Cellular Component: plant-type cell wall (GO:0009505);; Cellula…	--	--	--	--	--	Sulfated surface glycoprotein 185 (Precursor) OS=Volvox carteri (Green alga) PE=1 SV=1	--	--	Hop-interacting protein THI101 precursor [Solanum lycopersicum]	molecular function: binding (GO:0005488);; molecular function: structural molecule activity (GO:0005198);; biological process: response to stimulus (GO:0050896);; cellular component: cell (GO:0005623);; cellular component: cell part (GO:0044464);; cellular component: cell junction (GO:0030054);; cellular component: membrane (GO:0016020);; biological process: metabolic process (GO:0008152);; biolo…
PGSC0003DMG400026883	Gene of unknown function	0	0	0	0	0	0	13.4069	177	2.09886	28	14.5175	178	8.79937e-06	Inf	up	--	--	--	--	--	--	--	--	Protein TAP1 (Precursor) GN=TAP1 OS=Antirrhinum majus (Garden snapdragon) PE=2 SV=1	--	--	PREDICTED: uncharacterized protein LOC101248720 [Solanum lycopersicum]	--
PGSC0003DMG400012525	DREB1	2.43293	113	1.72746	89	1.85669	86	13.8748	642	14.6445	599	13.1563	564	1.21079e-21	2.88103	up	--	--	Molecular Function: transcription factor activity, sequence-specific DNA binding (GO:0003700);; Cellular Component: nucleus (GO:0005634);; Biological Process: regulation of transcription, DNA-templated (GO:0006355);; Biological Process: response to heat (GO:0009408);; Biological Process: response to water deprivation (GO:0009414);; Biological Process: response to salt stress (GO:0009651);; Biolog…	--	--	--	--	AP2 domain	Dehydration-responsive element-binding protein 1D GN=MSG15.7 OS=Arabidopsis thaliana (Mouse-ear cress) PE=2 SV=1	--	--	PREDICTED: dehydration-responsive element-binding protein 1F-like [Solanum lycopersicum]	molecular function: nucleic acid binding transcription factor activity (GO:0001071);; biological process: biological regulation (GO:0065007);; cellular component: cell (GO:0005623);; cellular component: organelle (GO:0043226);; cellular component: cell part (GO:0044464);; biological process: response to stimulus (GO:0050896);; biological process: reproduction (GO:0000003);; biological process: re…
PGSC0003DMG400027630	Heme-binding protein	0.966469	28	0.249687	9	0.549046	18	3.82337	172	2.12839	71	3.47655	112	9.55603e-06	2.87705	up	--	--	Cellular Component: vacuolar membrane (GO:0005774);; Cellular Component: plasma membrane (GO:0005886);; Cellular Component: chloroplast (GO:0009507);; Cellular Component: cytoplasmic vesicle (GO:0016023);; Biological Process: glucosinolate biosynthetic process (GO:0019761);;	--	--	--	--	SOUL heme-binding protein	Heme-binding-like protein At3g10130, chloroplastic (Precursor) GN=At3g10130 OS=Arabidopsis thaliana (Mouse-ear cress) PE=1 SV=1	R	General function prediction only	PREDICTED: heme-binding protein 2-like [Solanum lycopersicum]	cellular component: cell (GO:0005623);; cellular component: membrane (GO:0016020);; cellular component: organelle (GO:0043226);; cellular component: organelle part (GO:0044422);; cellular component: cell part (GO:0044464);; biological process: metabolic process (GO:0008152);; biological process: cellular process (GO:0009987);; biological process: single-organism process (GO:0044699)
PGSC0003DMG400027707	Gene of unknown function	0.260485	7	0.039514	2	0.039091	1	2.68997	63	2.55518	53	4.0824	89	1.65137e-10	4.58856	up	--	--	--	--	--	--	--	--	--	--	--	--	--
PGSC0003DMG400025948	Conserved gene of unknown function	11.0332	196	16.1542	318	13.4324	237	1.52339	27	1.6639	27	1.49065	25	4.41789e-11	-3.00421	down	--	--	--	--	--	--	--	--	--	--	--	predicted protein [Populus trichocarpa]	--
PGSC0003DMG400020360	Conserved gene of unknown function	1.95142	118	1.65299	111	1.59328	93	5.08799	471	10.1899	570	6.68741	400	4.68271e-09	2.4092	up	--	--	--	--	--	--	--	Protein of unknown function (DUF674)	--	S	Function unknown	PREDICTED: uncharacterized protein LOC101258777 [Solanum lycopersicum]	--
PGSC0003DMG400008669	Conserved gene of unknown function	0.386683	22	0.54667	34	0.4515	25	2.63961	145	2.5286	123	2.10446	107	4.22536e-06	2.44688	up	--	--	Molecular Function: binding (GO:0005488);; Biological Process: metabolic process (GO:0008152);; Molecular Function: hydrolase activity (GO:0016787);;	--	--	[R]	General function prediction only	--	Endonuclease OS=Nicotiana tabacum (Common tobacco) PE=2 SV=1	R	General function prediction only	PREDICTED: uncharacterized mitochondrial protein AtMg00810-like [Solanum lycopersicum]	molecular function: binding (GO:0005488);; biological process: metabolic process (GO:0008152);; molecular function: catalytic activity (GO:0003824)
PGSC0003DMG400039856	Beta-glucan-elicitor receptor	2.28572	160	2.23701	173	2.31957	161	14.8496	1034	14.3813	886	12.653	816	5.55712e-26	2.7006	up	--	--	Biological Process: cell wall macromolecule catabolic process (GO:0016998);; Molecular Function: glucan endo-1,3-beta-glucanase activity, C-3 substituted reducing group (GO:0052861);; Molecular Function: glucan endo-1,4-beta-glucanase activity, C-3 substituted reducing group (GO:0052862);;	K01180|0|sot:102585521|K01180 endo-1,3(4)-beta-glucanase [EC:3.2.1.6] | (RefSeq) endo-1,3(4)-beta-glucanase 1-like	--	[G]	Carbohydrate transport and metabolism	Glycosyl hydrolase family 81	--	M	Cell wall/membrane/envelope biogenesis	PREDICTED: endo-1,3(4)-beta-glucanase 1-like [Solanum lycopersicum]	biological process: metabolic process (GO:0008152);; biological process: cellular process (GO:0009987);; molecular function: catalytic activity (GO:0003824)
PGSC0003DMG400000583	NDR1/HIN1	0.065475	2	0.18443	7	0.409828	13	1.79075	53	1.0795	29	1.39953	39	0.000396405	2.66189	up	--	--	Cellular Component: plasma membrane (GO:0005886);;	--	--	--	--	Late embryogenesis abundant protein	--	S	Function unknown	PREDICTED: uncharacterized protein LOC101250578 [Solanum lycopersicum]	cellular component: cell (GO:0005623);; cellular component: membrane (GO:0016020);; cellular component: cell part (GO:0044464)
PGSC0003DMG400027127	Anthocyanin 5-aromatic acyltransferase	17.8337	997	28.6546	1777	15.3538	854	1.48262	83	2.68678	133	1.45919	76	3.16132e-06	-3.36232	down	--	--	Cellular Component: cytoplasm (GO:0005737);; Molecular Function: O-acyltransferase activity (GO:0008374);; Biological Process: anatomical structure morphogenesis (GO:0009653);; Biological Process: cellular component organization (GO:0016043);; Molecular Function: N-acyltransferase activity (GO:0016410);; Biological Process: cellular biosynthetic process (GO:0044249);; Biological Process: single-o…	--	--	--	--	Transferase family	BAHD acyltransferase DCR GN=MRO11.2 OS=Arabidopsis thaliana (Mouse-ear cress) PE=2 SV=1	S	Function unknown	PREDICTED: BAHD acyltransferase DCR-like [Solanum lycopersicum]	cellular component: cell (GO:0005623);; cellular component: cell part (GO:0044464);; molecular function: catalytic activity (GO:0003824);; biological process: developmental process (GO:0032502);; biological process: cellular process (GO:0009987);; biological process: cellular component organization or biogenesis (GO:0071840);; biological process: metabolic process (GO:0008152);; biological proces…
Solanum_tuberosum_newGene_8259	--	0.120647	8	0.140036	11	0.15759	11	5.06776	163	2.37651	92	2.54307	84	2.73475e-10	3.70732	up	--	--	--	--	--	--	--	Transposase family tnp2;; Domain of unknown function (DUF4218)	--	--	--	PREDICTED: uncharacterized protein LOC104238594 [Nicotiana sylvestris]	--
PGSC0003DMG400020084	Zinc finger protein	0.1541	7	0	0	0.051257	3	3.21729	127	1.041	37	3.3427	123	2.4854e-05	5.01764	up	--	--	Molecular Function: carboxylic ester hydrolase activity (GO:0004091);; Cellular Component: cell wall (GO:0005618);; Cellular Component: nucleus (GO:0005634);; Biological Process: lipid metabolic process (GO:0006629);; Cellular Component: chloroplast thylakoid (GO:0009534);; Biological Process: response to salicylic acid (GO:0009751);; Biological Process: stomatal complex morphogenesis (GO:0010103…	--	--	--	--	GDSL-like Lipase/Acylhydrolase	GDSL esterase/lipase At5g33370 (Precursor) GN=At5g33370 OS=Arabidopsis thaliana (Mouse-ear cress) PE=2 SV=1	I	Lipid transport and metabolism	PREDICTED: GDSL esterase/lipase At5g33370-like [Solanum lycopersicum]	cellular component: cell (GO:0005623);; cellular component: cell part (GO:0044464);; cellular component: organelle (GO:0043226);; biological process: metabolic process (GO:0008152);; biological process: single-organism process (GO:0044699);; cellular component: organelle part (GO:0044422);; biological process: response to stimulus (GO:0050896);; biological process: developmental process (GO:00325…
PGSC0003DMG400003573	Senescence-associated protein	7.28872	272	7.96243	322	6.73271	248	26.6667	1022	73.4013	2414	62.0409	2134	0.00168794	3.0022	up	[P]	Inorganic ion transport and metabolism	Biological Process: response to hypoxia (GO:0001666);; Molecular Function: thiosulfate sulfurtransferase activity (GO:0004792);; Cellular Component: nucleus (GO:0005634);; Cellular Component: cytoplasm (GO:0005737);; Biological Process: nucleobase-containing compound metabolic process (GO:0006139);; Biological Process: iron ion transport (GO:0006826);; Biological Process: response to oxidative st…	--	--	[P]	Inorganic ion transport and metabolism	Rhodanese-like domain	Thiosulfate sulfurtransferase 18 GN=STR18 OS=Arabidopsis thaliana (Mouse-ear cress) PE=1 SV=1	P	Inorganic ion transport and metabolism	PREDICTED: thiosulfate sulfurtransferase 18-like [Solanum lycopersicum]	biological process: response to stimulus (GO:0050896);; molecular function: catalytic activity (GO:0003824);; cellular component: cell (GO:0005623);; cellular component: organelle (GO:0043226);; cellular component: cell part (GO:0044464);; biological process: metabolic process (GO:0008152);; biological process: cellular process (GO:0009987);; biological process: localization (GO:0051179);; biolog…
PGSC0003DMG401002919	Gene of unknown function	0.439272	26	0.218173	15	0.380679	23	4.99812	293	5.75537	298	4.9709	270	3.2663e-20	3.97947	up	--	--	--	--	--	--	--	--	--	--	--	--	--
PGSC0003DMG400008782	Conserved gene of unknown function	0.683893	16	0.156567	5	0.586824	14	6.02241	140	2.15693	45	3.3098	72	0.00235695	3.04681	up	--	--	Molecular Function: protein binding (GO:0005515);; Biological Process: response to fungus (GO:0009620);; Biological Process: systemic acquired resistance (GO:0009627);; Biological Process: response to abiotic stimulus (GO:0009628);; Biological Process: jasmonic acid metabolic process (GO:0009694);; Biological Process: response to ethylene (GO:0009723);; Biological Process: response to salicylic a…	--	--	--	--	Divergent CCT motif;; tify domain	Protein TIFY 5A GN=T2H7 OS=Arabidopsis thaliana (Mouse-ear cress) PE=1 SV=1	S	Function unknown	PREDICTED: protein TIFY 5A-like [Solanum lycopersicum]	molecular function: binding (GO:0005488);; biological process: response to stimulus (GO:0050896);; biological process: multi-organism process (GO:0051704);; biological process: immune system process (GO:0002376);; biological process: metabolic process (GO:0008152);; biological process: cellular process (GO:0009987);; biological process: single-organism process (GO:0044699);; biological process: s…
Solanum_tuberosum_newGene_7933	--	0.145736	6	0	0	0.258145	11	1.33942	52	2.49726	82	1.41478	51	4.53921e-06	3.66668	up	--	--	--	--	--	--	--	--	--	S	Function unknown	PREDICTED: uncharacterized protein LOC109121245 [Solanum lycopersicum]	--
PGSC0003DMG400004715	Trichohyalin	0.148579	11	0.41993	30	0.240472	15	1.58172	97	1.5268	79	1.5313	87	3.33891e-05	2.47777	up	[P]	Inorganic ion transport and metabolism	--	--	--	--	--	Cleavage site for pathogenic type III effector avirulence factor Avr	--	S	Function unknown	PREDICTED: uncharacterized protein LOC101255675 [Solanum lycopersicum]	--
PGSC0003DMG400005156	F-box protein	0.342736	13	0.365535	16	0.16105	6	1.69905	63	1.45237	48	1.08727	38	0.00112165	2.32641	up	--	--	--	--	--	--	--	F-box domain	Putative F-box protein At3g10240 GN=At3g10240 OS=Arabidopsis thaliana (Mouse-ear cress) PE=4 SV=1	--	--	PREDICTED: putative F-box protein At1g47790-like [Solanum lycopersicum]	--
Solanum_tuberosum_newGene_12173	--	0.028903	3	0	0	0	0	8.24407	579	1.69047	105	6.04946	394	8.02703e-07	8.65362	up	--	--	Molecular Function: iron ion binding (GO:0005506);; Biological Process: fatty acid biosynthetic process (GO:0006633);; Cellular Component: integral component of membrane (GO:0016021);; Molecular Function: oxidoreductase activity (GO:0016491);; Biological Process: oxidation-reduction process (GO:0055114);;	K15404|0|sot:102579007|K15404 aldehyde decarbonylase [EC:4.1.99.5] | (RefSeq) protein ECERIFERUM 1-like	Cutin, suberine and wax biosynthesis (ko00073)	--	--	WAX2 C-terminal domain;; Fatty acid hydroxylase superfamily	Protein ECERIFERUM 1 OS=Arabidopsis thaliana OX=3702 GN=CER1 PE=1 SV=1	S	Function unknown	PREDICTED: protein ECERIFERUM 1-like [Solanum tuberosum]	molecular function: binding (GO:0005488);; biological process: metabolic process (GO:0008152);; biological process: cellular process (GO:0009987);; biological process: single-organism process (GO:0044699);; cellular component: membrane (GO:0016020);; cellular component: membrane part (GO:0044425);; molecular function: catalytic activity (GO:0003824)
PGSC0003DMG402025689	Conserved gene of unknown function	2.99679	134	2.98569	148	3.16376	141	0.484522	22	0.530972	21	0.361144	15	1.31266e-06	-2.63198	down	[QR]	Secondary metabolites biosynthesis, transport and catabolism;; General function prediction only	Cellular Component: cytoplasm (GO:0005737);; Molecular Function: O-methyltransferase activity (GO:0008171);; Biological Process: isoflavonoid phytoalexin biosynthetic process (GO:0009701);; Biological Process: flavonoid metabolic process (GO:0009812);; Biological Process: alkaloid biosynthetic process (GO:0009821);; Molecular Function: isoflavone 4'-O-methyltransferase activity (GO:0030746);; Mol…	--	--	[R]	General function prediction only	O-methyltransferase;; Dimerisation domain	Trans-resveratrol di-O-methyltransferase GN=ROMT OS=Vitis vinifera (Grape) PE=1 SV=2	R	General function prediction only	PREDICTED: trans-resveratrol di-O-methyltransferase-like [Solanum lycopersicum]	cellular component: cell (GO:0005623);; cellular component: cell part (GO:0044464);; molecular function: catalytic activity (GO:0003824);; biological process: metabolic process (GO:0008152);; biological process: cellular process (GO:0009987);; biological process: single-organism process (GO:0044699);; molecular function: binding (GO:0005488)
PGSC0003DMG400015229	BTB/POZ domain-containing protein	78.4677	4400	83.3999	5173	78.7857	4388	14.051	787	13.4355	666	13.1975	690	4.67558e-34	-2.47029	down	--	--	Molecular Function: transcription cofactor activity (GO:0003712);; Molecular Function: histone acetyltransferase activity (GO:0004402);; Molecular Function: calmodulin binding (GO:0005516);; Cellular Component: nucleus (GO:0005634);; Cellular Component: cytoplasm (GO:0005737);; Cellular Component: vacuolar membrane (GO:0005774);; Biological Process: regulation of transcription, DNA-templated (GO:…	--	--	[K]	Transcription	BTB/POZ domain;; TAZ zinc finger	BTB/POZ and TAZ domain-containing protein 1 GN=BT1 OS=Arabidopsis thaliana (Mouse-ear cress) PE=1 SV=1	K	Transcription	PREDICTED: BTB/POZ and TAZ domain-containing protein 1-like [Solanum lycopersicum]	molecular function: transcription factor activity, protein binding (GO:0000988);; biological process: biological regulation (GO:0065007);; molecular function: catalytic activity (GO:0003824);; molecular function: binding (GO:0005488);; cellular component: cell (GO:0005623);; cellular component: organelle (GO:0043226);; cellular component: cell part (GO:0044464);; cellular component: membrane (GO:…
PGSC0003DMG402002919	Gene of unknown function	0.695647	63	0.501148	51	0.699981	64	6.21495	563	4.0823	327	3.85766	324	6.61728e-12	2.97556	up	--	--	--	--	--	--	--	--	--	--	--	--	--
PGSC0003DMG400001415	Conserved gene of unknown function	2.23966	79	2.0137	79	2.80131	99	35.2461	1240	45.3932	1412	37.0133	1206	9.23905e-39	4.14745	up	--	--	Cellular Component: mitochondrion (GO:0005739);;	--	--	--	--	--	--	S	Function unknown	PREDICTED: uncharacterized protein LOC101260389 [Solanum lycopersicum]	cellular component: cell (GO:0005623);; cellular component: organelle (GO:0043226);; cellular component: cell part (GO:0044464)
PGSC0003DMG400031523	Glycine-rich cell wall structural protein 1.8	0.454183	20	0.04286	2	0	0	5.2363	220	3.33131	124	6.63108	212	9.49457e-20	4.86724	up	--	--	Biological Process: cell morphogenesis (GO:0000902);; Molecular Function: binding (GO:0005488);; Cellular Component: plant-type cell wall (GO:0009505);; Biological Process: trichoblast differentiation (GO:0010054);; Cellular Component: cytoplasmic vesicle (GO:0016023);; Biological Process: cell growth (GO:0016049);; Cellular Component: intracellular organelle (GO:0043229);; Biological Process: ce…	--	--	--	--	--	Glycine-rich cell wall structural protein 1 (Precursor) GN=GRP-1 OS=Petunia hybrida (Petunia) PE=1 SV=1	--	--	hypothetical protein PDIG_81210 [Penicillium digitatum PHI26]	biological process: cellular process (GO:0009987);; biological process: developmental process (GO:0032502);; biological process: single-organism process (GO:0044699);; biological process: cellular component organization or biogenesis (GO:0071840);; molecular function: binding (GO:0005488);; cellular component: cell (GO:0005623);; cellular component: cell part (GO:0044464);; biological process: mu…
PGSC0003DMG402003297	Protein ZINC INDUCED FACILITATOR-LIKE 1	0.408216	26	0.126293	9	0.365344	21	1.91169	118	1.01397	56	1.96142	111	8.88682e-06	2.54375	up	[GEPR]	Carbohydrate transport and metabolism;; Amino acid transport and metabolism;; Inorganic ion transport and metabolism;; General function prediction only	Cellular Component: plasma membrane (GO:0005886);; Biological Process: response to water deprivation (GO:0009414);; Biological Process: response to nematode (GO:0009624);; Biological Process: gravitropism (GO:0009630);; Cellular Component: plant-type vacuole membrane (GO:0009705);; Biological Process: response to zinc ion (GO:0010043);; Biological Process: basipetal auxin transport (GO:0010540);;…	--	--	[R]	General function prediction only	Major Facilitator Superfamily;; Sugar (and other) transporter	Protein ZINC INDUCED FACILITATOR-LIKE 1 GN=ZIFL1 OS=Arabidopsis thaliana (Mouse-ear cress) PE=2 SV=1	R	General function prediction only	PREDICTED: protein ZINC INDUCED FACILITATOR-LIKE 1-like [Solanum lycopersicum]	cellular component: cell (GO:0005623);; cellular component: membrane (GO:0016020);; cellular component: cell part (GO:0044464);; biological process: response to stimulus (GO:0050896);; biological process: multi-organism process (GO:0051704);; cellular component: organelle (GO:0043226);; cellular component: organelle part (GO:0044422);; biological process: single-organism process (GO:0044699);; bi…
PGSC0003DMG400009851	Gene of unknown function	0	0	0	0	0	0	1.22058	85	0.976488	60	0.642218	42	9.82222e-16	Inf	up	--	--	--	--	--	--	--	--	--	--	--	PREDICTED: uncharacterized protein LOC101259543 [Solanum lycopersicum]	--
PGSC0003DMG400024063	Phytoene synthase 1, chloroplastic	1.06993	70	0.098573	8	0.824755	53	4.45772	288	1.69438	97	3.38833	203	0.00430128	2.33844	up	[I]	Lipid transport and metabolism	Biological Process: unsaturated fatty acid biosynthetic process (GO:0006636);; Biological Process: phosphatidylglycerol biosynthetic process (GO:0006655);; Cellular Component: chloroplast (GO:0009507);; Cellular Component: plastoglobule (GO:0010287);; Biological Process: chlorophyll biosynthetic process (GO:0015995);; Biological Process: carotenoid biosynthetic process (GO:0016117);; Biological P…	K02291|0|sot:102593756|K02291 15-cis-phytoene/all-trans-phytoene synthase [EC:2.5.1.32 2.5.1.99] | (RefSeq) phytoene synthase 1, chloroplastic	Carotenoid biosynthesis (ko00906)	[I]	Lipid transport and metabolism	Squalene/phytoene synthase	Phytoene synthase 1, chloroplastic (Precursor) GN=PSY1 OS=Solanum lycopersicum (Tomato) PE=1 SV=2	I	Lipid transport and metabolism	phytoene synthase 1, chloroplastic [Solanum lycopersicum]	biological process: metabolic process (GO:0008152);; biological process: cellular process (GO:0009987);; biological process: single-organism process (GO:0044699);; cellular component: cell (GO:0005623);; cellular component: organelle (GO:0043226);; cellular component: cell part (GO:0044464);; cellular component: organelle part (GO:0044422);; molecular function: catalytic activity (GO:0003824)
PGSC0003DMG400028620	DNA photolyase	0.210252	16	0.256095	22	0.239513	19	4.55541	340	2.24074	149	3.63149	252	1.43278e-10	3.90828	up	[L]	Replication, recombination and repair	Molecular Function: nucleotide binding (GO:0000166);; Molecular Function: DNA binding (GO:0003677);; Molecular Function: deoxyribodipyrimidine photo-lyase activity (GO:0003904);; Molecular Function: DNA (6-4) photolyase activity (GO:0003914);; Cellular Component: nucleus (GO:0005634);; Biological Process: DNA repair (GO:0006281);; Biological Process: response to UV (GO:0009411);; Cellular Compone…	K02295|0|sot:102605735|K02295 cryptochrome | (RefSeq) (6-4)DNA photolyase	--	[LT]	Replication, recombination and repair;; Signal transduction mechanisms	FAD binding domain of DNA photolyase;; DNA photolyase	(6-4)DNA photolyase GN=UVR3 OS=Arabidopsis thaliana (Mouse-ear cress) PE=1 SV=2	L	Replication, recombination and repair	PREDICTED: (6-4)DNA photolyase-like [Solanum lycopersicum]	molecular function: binding (GO:0005488);; molecular function: catalytic activity (GO:0003824);; cellular component: cell (GO:0005623);; cellular component: organelle (GO:0043226);; cellular component: cell part (GO:0044464);; biological process: metabolic process (GO:0008152);; biological process: cellular process (GO:0009987);; biological process: response to stimulus (GO:0050896)
PGSC0003DMG400014093	Flavonol synthase	0.146188	8	0.075708	5	0.041919	3	4.45345	215	2.3758	102	3.423	154	8.61259e-17	5.08811	up	[R]	General function prediction only	Molecular Function: transmembrane receptor protein serine/threonine kinase activity (GO:0004675);; Molecular Function: iron ion binding (GO:0005506);; Molecular Function: protein binding (GO:0005515);; Molecular Function: ATP binding (GO:0005524);; Cellular Component: cytoplasm (GO:0005737);; Cellular Component: endosome (GO:0005768);; Cellular Component: plasma membrane (GO:0005886);; Biological…	K05278|0|sot:102577717|K05278 flavonol synthase [EC:1.14.11.23] | (RefSeq) FLS; flavonol synthase	Flavonoid biosynthesis (ko00941)	[QR]	Secondary metabolites biosynthesis, transport and catabolism;; General function prediction only	non-haem dioxygenase in morphine synthesis N-terminal;; 2OG-Fe(II) oxygenase superfamily	Flavonol synthase/flavanone 3-hydroxylase OS=Solanum tuberosum (Potato) PE=2 SV=1	H	Coenzyme transport and metabolism	flavonol synthase [Solanum tuberosum]	molecular function: catalytic activity (GO:0003824);; molecular function: signal transducer activity (GO:0004871);; molecular function: molecular transducer activity (GO:0060089);; biological process: metabolic process (GO:0008152);; biological process: cellular process (GO:0009987);; biological process: signaling (GO:0023052);; biological process: single-organism process (GO:0044699);; biologica…
PGSC0003DMG400020315	Glycerol-3-phosphate acyltransferase 6	0.276791	17	0.062486	5	0.191535	12	1.92054	113	0.900171	47	0.760043	42	0.00769055	2.74653	up	--	--	Biological Process: very long-chain fatty acid metabolic process (GO:0000038);; Biological Process: polysaccharide biosynthetic process (GO:0000271);; Molecular Function: 1-acylglycerol-3-phosphate O-acyltransferase activity (GO:0003841);; Cellular Component: mitochondrion (GO:0005739);; Cellular Component: endoplasmic reticulum (GO:0005783);; Biological Process: phosphatidylglycerol biosynthetic…	K13508|0|sot:102603688|K13508 glycerol-3-phosphate acyltransferase [EC:2.3.1.15] | (RefSeq) glycerol-3-phosphate 2-O-acyltransferase 6	Glycerolipid metabolism (ko00561);; Glycerophospholipid metabolism (ko00564)	--	--	haloacid dehalogenase-like hydrolase;; Acyltransferase	Glycerol-3-phosphate 2-O-acyltransferase 6 GN=GPAT6 OS=Arabidopsis thaliana (Mouse-ear cress) PE=1 SV=1	I	Lipid transport and metabolism	PREDICTED: glycerol-3-phosphate 2-O-acyltransferase 6-like [Solanum lycopersicum]	biological process: metabolic process (GO:0008152);; biological process: cellular process (GO:0009987);; biological process: single-organism process (GO:0044699);; molecular function: catalytic activity (GO:0003824);; cellular component: cell (GO:0005623);; cellular component: organelle (GO:0043226);; cellular component: cell part (GO:0044464);; biological process: multicellular organismal proces…
